# Supplementary material for: Characterization of the immunophenotypes and antigenomes of colorectal cancers reveals distinct tumor escape mechanisms and novel targets for immunotherapy
Source: PubMed Central journal article supplement (PMC4377852; doi:10.1186/s13059-015-0620-6), 2015-03-31
Supplement: 13059_2015_620_MOESM2_ESM.pdf [file 13059_2015_620_MOESM2_ESM.pdf]

**Table S1:** Accession numbers of the microarray profiles used to derive the compendium of immune genes

| <b>DB source</b> | <b>DATASET ID</b>          | <b>Publication (PMID)</b> | <b>Platform (s)</b> | <b>Study description</b>                                                                                                                                                                                                                                                                                                                                                                                                                                 |
|------------------|----------------------------|---------------------------|---------------------|----------------------------------------------------------------------------------------------------------------------------------------------------------------------------------------------------------------------------------------------------------------------------------------------------------------------------------------------------------------------------------------------------------------------------------------------------------|
| ArrayExpress     | <a href="#">E-MEXP-380</a> | <a href="#">16966385</a>  | HG-U133A            | Human NK cells were sorted into CD56dim and CD56bright NK cell subpopulations. Gene profiling was performed, in order to define characteristics of both populations. The experiment contains systematically annotated and consistently normalized human gene expression data matrix of 5372 samples integrated from 206 public experiments of a HG-U133A array platform, representing 369 different cell and tissue types, disease states and cell lines |
| ArrayExpress     | <a href="#">E-MTAB-62</a>  | <a href="#">20379172</a>  | HG-U133A            | Transcription profiling of human precursor-B-cell differentiation: five subsets representing the main stages of human precursor-B-cell differentiation and CD34+lin- cord blood cells were purified.                                                                                                                                                                                                                                                     |
| ArrayExpress     | <a href="#">E-MEXP-384</a> | <a href="#">21680796</a>  | HG-U133A            | Transcription profiling of human memory T cells stimulated with PhI p-extract in healthy and allergic individuals                                                                                                                                                                                                                                                                                                                                        |
| ArrayExpress     | <a href="#">E-MEXP-243</a> | <a href="#">15746248</a>  | HG-U133A            | The data contains 79 different human tissues and cell types with 2 replicates per tissue/cell type.                                                                                                                                                                                                                                                                                                                                                      |
| ArrayExpress     | <a href="#">E-TABM-145</a> | <a href="#">19274049</a>  | HG-U133A            | Expression profiling studies on colon cancer comparing tumoral and normal biopsies from a series of patients in order to identify molecular biomarkers.                                                                                                                                                                                                                                                                                                  |
| ArrayExpress     | <a href="#">E-MTAB-57</a>  | <a href="#">16919171</a>  | HG-U133A            | Expression profiles of twelve different types of human leukocytes from peripheral blood and bone marrow. The gene expression profiles are performed before and after treatment to induce activation and/or differentiation.                                                                                                                                                                                                                              |
| GEO              | <a href="#">GSE22886</a>   | <a href="#">15789058</a>  | HG-U133A            | Gene-expression profiles of non-tumor-reactive CD8+ T cells                                                                                                                                                                                                                                                                                                                                                                                              |
| GEO              | <a href="#">GSE11188</a>   | <a href="#">19435912</a>  | HG-U133A            | Gene transcription profiles for the major leukocyte types in humans: Different leukocyte subsets were either isolated or differentiated from human blood to obtain consistently >95% pure populations. Gene profiles for activated effector cells such as macrophages, neutrophils and mast cells were also generated.                                                                                                                                   |
| GEO              | <a href="#">GSE3982</a>    | <a href="#">16339519</a>  | HG-U133A            | Gene expression is measured in nine stages of T cell development.                                                                                                                                                                                                                                                                                                                                                                                        |
| GEO              | <a href="#">GSE22601</a>   | <a href="#">15928199</a>  | HG-U133A            |                                                                                                                                                                                                                                                                                                                                                                                                                                                          |

|     |                          |                          |          |                                                                                                                                                                                                                                                  |
|-----|--------------------------|--------------------------|----------|--------------------------------------------------------------------------------------------------------------------------------------------------------------------------------------------------------------------------------------------------|
| GEO | <a href="#">GSE13017</a> | <a href="#">19453521</a> | HG-U133A | Homo sapiens CD4+CD25- and CD4+CD25hi T cells were sorted from healthy individual donors and analyzed ex vivo (non-activated) or 1 day following T-cell receptor activation using anti-CD3/IL2 and anti-CD3/-CD28/IL2 (activated), respectively. |
| GEO | <a href="#">GSE1460</a>  | <a href="#">15210650</a> | HG-U133A | Subpopulations of human fetal thymocyte and circulating naïve T cells were obtained through FACS sorting.                                                                                                                                        |
| GEO | <a href="#">GSE4571</a>  | <a href="#">16836768</a> | HG-U133A | Expression profiles of human Treg cells obtained from peripheral blood by cell sorting and their naïve controls.                                                                                                                                 |
| GEO | <a href="#">GSE24634</a> | <a href="#">21347372</a> | HG-U133A | Expression data from developing regulatory T cells                                                                                                                                                                                               |
| GEO | <a href="#">GSE36476</a> | <a href="#">22434910</a> | HG-U133A | Gene expression signatures in elderly CD4 T cell responses                                                                                                                                                                                       |
| GEO | <a href="#">GSE17354</a> | <a href="#">19652199</a> | HG-U133A | Gene expression profiling of CD4+ and CD8+ T-cells from gene therapy treated ADA patients and from healthy controls                                                                                                                              |
| GEO | <a href="#">GSE1133</a>  | <a href="#">15075390</a> | HG-U133A | Tissue-specific pattern of mRNA expression in 79 human and mouse tissues                                                                                                                                                                         |
| GEO | <a href="#">GSE3996</a>  | <a href="#">17573725</a> | HG-U133A | Differential gene expression in regulatory T-cells after activation by temporary contact with dendritic cells                                                                                                                                    |
| GEO | <a href="#">GSE1323</a>  | <a href="#">16531451</a> | HG-U133A | Expression profiling of the SW480 and SW620 colon cancer cells lines derived from a primary tumor and a corresponding metastasis from the same individual.                                                                                       |
| GEO | <a href="#">GSE24514</a> | <a href="#">21544814</a> | HG-U133A | Expression data from human MSI colorectal cancer and normal colonic mucosa                                                                                                                                                                       |
| GEO | <a href="#">GSE6740</a>  | <a href="#">17251300</a> | HG-U133A | Comparison of transcriptional profiles of CD4+ and CD8+ T cells from HIV-infected patients and uninfected control group-                                                                                                                         |
| GEO | <a href="#">GSE8835</a>  | <a href="#">15965501</a> | HG-U133A | CD4 T cells and CD8 T cells were obtained from peripheral blood mononuclear cells of previously untreated patients with CLL and healthy individuals.                                                                                             |
| GEO | <a href="#">GSE13411</a> | <a href="#">19124732</a> | HG-U133A | Four subsets of human splenic B cells (naïve, IgM-memory, Ig isotype switched memory and plasma cells); sort-purified and analysed immediately ex vivo; performed in duplicate.                                                                  |
| GEO | <a href="#">GSE5580</a>  | <a href="#">17032758</a> | HG-U133A | Gene expression profiling of circulating total blood leukocytes, T-Cells, and Monocytes in severe trauma patients and healthy subjects.                                                                                                          |
| GEO | <a href="#">GSE6477</a>  | <a href="#">17409404</a> | HG-U133A | Expression data from different stages of plasma cell neoplasm.                                                                                                                                                                                   |
| GEO | <a href="#">GSE4045</a>  | <a href="#">16819509</a> | HG-U133A | Expression profile of serrated and conventional colorectal tumors                                                                                                                                                                                |
| GEO | <a href="#">GSE2328</a>  | <a href="#">15781863</a> | HG-U133A | Application of genome-wide expression analysis to human health and disease                                                                                                                                                                       |

|     |                          |                          |                |                                                                                                                                                                                                                                                                                                         |
|-----|--------------------------|--------------------------|----------------|---------------------------------------------------------------------------------------------------------------------------------------------------------------------------------------------------------------------------------------------------------------------------------------------------------|
| GEO | <a href="#">GSE11430</a> | <a href="#">18578872</a> | HG-U133_Plus_2 | Gene expression profiles of human monocytes and monocyte-derived-macrophages.                                                                                                                                                                                                                           |
| GEO | <a href="#">GSE2509</a>  | <a href="#">16531451</a> | HG-U133A       | Two colon cancer cell lines are profiled: SW480 and SW620.                                                                                                                                                                                                                                              |
| GEO | <a href="#">GSE24759</a> | <a href="#">21241896</a> | U133AAofAv2    | 38 distinct hematopoietic cell states based on cell surface marker expression, representing hematopoietic stem and progenitor cells, terminally differentiated cells, and intermediate states are defined.                                                                                              |
| GEO | <a href="#">GSE41258</a> | <a href="#">19359472</a> | HG-U133A       | 390 expression arrays from colorectal cancer patients                                                                                                                                                                                                                                                   |
| GEO | <a href="#">GSE28726</a> | <a href="#">21632718</a> | HG-U133_Plus_2 | Microarray analysis was performed to determine the transcriptional profiles of NKT, CD1d-aGC+ Va24-, and CD4 T cells.                                                                                                                                                                                   |
| GEO | <a href="#">GSE30687</a> | <a href="#">21985787</a> | HG-U133A_2     | Gene profiling of metastatic colorectal cancer cells (L1 and L2) and non-metastatic colorectal cancer cells (sw620 and sw480)                                                                                                                                                                           |
| GEO | <a href="#">GSE35340</a> | <a href="#">23074278</a> | HG-U133_Plus_2 | Transcriptome analysis of highly purified CD207+/CD1a+ Langerhans cell histiocytosis (LCH) cells derived from different locations and disease courses and three major human dendritic cell lineages: epidermal Langerhans cells, myeloid dendritic cells (mDC1) and plasmacytoid dendritic cells (pDC). |
| GEO | <a href="#">GSE49910</a> | <a href="#">24053356</a> | HG-U133_Plus_2 | Meta-analysis of publically available human primary cell data                                                                                                                                                                                                                                           |
| GEO | <a href="#">GSE51540</a> | <a href="#">24492460</a> | HG-U133_Plus_2 | Cassical Th17 cells (Th17) or those generated in the presence of the inhibitor (iTh17) are sorted and analyzed by full transcriptome microarray analysis.                                                                                                                                               |

---

**Table S2:** List of immune metagenes.

| <b>Name</b> | <b>CellType</b>   |
|-------------|-------------------|
| AKNA        | Activated B cells |
| ARHGAP25    | Activated B cells |
| CCL21       | Activated B cells |
| CD180       | Activated B cells |
| CD2         | Activated B cells |
| CD27        | Activated B cells |
| CD37        | Activated B cells |
| CD38        | Activated B cells |
| CLEC17A     | Activated B cells |
| CLEC9A      | Activated B cells |
| CLECL1      | Activated B cells |
| FAIM3       | Activated B cells |
| FAM65B      | Activated B cells |
| GIMAP4      | Activated B cells |
| MAP4K1      | Activated B cells |
| PAX5        | Activated B cells |
| TNFRSF17    | Activated B cells |
| TRAF3IP3    | Activated B cells |
| ANLN        | Activated CD4     |
| BRIP1       | Activated CD4     |
| BUB1B       | Activated CD4     |
| CASC5       | Activated CD4     |
| CCNB1       | Activated CD4     |
| CCNB2       | Activated CD4     |
| CCNE2       | Activated CD4     |
| CEP55       | Activated CD4     |
| CKAP2L      | Activated CD4     |
| DLGAP5      | Activated CD4     |
| DTL         | Activated CD4     |
| E2F8        | Activated CD4     |
| ECT2        | Activated CD4     |
| ESCO2       | Activated CD4     |
| EXO1        | Activated CD4     |
| EXOC6       | Activated CD4     |
| FBXO5       | Activated CD4     |
| FIGNL1      | Activated CD4     |
| HELLS       | Activated CD4     |
| HMMR        | Activated CD4     |
| IARS        | Activated CD4     |
| KIF11       | Activated CD4     |
| KIF18A      | Activated CD4     |
| KIF20A      | Activated CD4     |
| KNTC1       | Activated CD4     |
| MAD2L1      | Activated CD4     |
| MASTL       | Activated CD4     |
| MTHFD2      | Activated CD4     |
| NCAPG2      | Activated CD4     |

|           |                    |
|-----------|--------------------|
| NCAPH     | Activated CD4      |
| NEIL3     | Activated CD4      |
| NUF2      | Activated CD4      |
| PRC1      | Activated CD4      |
| PSAT1     | Activated CD4      |
| RTKN2     | Activated CD4      |
| ADRM1     | Activated CD8      |
| AHSA1     | Activated CD8      |
| C1GALT1C1 | Activated CD8      |
| CCT5      | Activated CD8      |
| CCT6B     | Activated CD8      |
| CETN3     | Activated CD8      |
| CSE1L     | Activated CD8      |
| EIF2S1    | Activated CD8      |
| GAL       | Activated CD8      |
| GEMIN6    | Activated CD8      |
| GPT2      | Activated CD8      |
| KIAA0101  | Activated CD8      |
| MND1      | Activated CD8      |
| MPZL1     | Activated CD8      |
| MRPS16    | Activated CD8      |
| PCNA      | Activated CD8      |
| PTRH2     | Activated CD8      |
| RFC5      | Activated CD8      |
| SPC25     | Activated CD8      |
| TIMM13    | Activated CD8      |
| TIMM8B    | Activated CD8      |
| TK1       | Activated CD8      |
| TUBB      | Activated CD8      |
| TXNDC17   | Activated CD8      |
| ADAM19    | Central memory CD4 |
| AHNAK     | Central memory CD4 |
| AIM2      | Central memory CD4 |
| COL4A1    | Central memory CD4 |
| CYLD      | Central memory CD4 |
| DPEP2     | Central memory CD4 |
| EPHA4     | Central memory CD4 |
| FYN       | Central memory CD4 |
| IL6R      | Central memory CD4 |
| IPCEF1    | Central memory CD4 |
| KLF10     | Central memory CD4 |
| MAL       | Central memory CD4 |
| MALT1     | Central memory CD4 |
| NXN       | Central memory CD4 |
| OPTN      | Central memory CD4 |
| PLCL2     | Central memory CD4 |
| PNRC1     | Central memory CD4 |
| SMAD4     | Central memory CD4 |
| SPOCK2    | Central memory CD4 |
| TRIB2     | Central memory CD4 |

|           |                    |
|-----------|--------------------|
| TXK       | Central memory CD4 |
| ADAM23    | Central memory CD8 |
| ATP2B4    | Central memory CD8 |
| BCL2L11   | Central memory CD8 |
| CD300A    | Central memory CD8 |
| CD80      | Central memory CD8 |
| CHN1      | Central memory CD8 |
| F2R       | Central memory CD8 |
| F8        | Central memory CD8 |
| GABARAPL1 | Central memory CD8 |
| GPR183    | Central memory CD8 |
| KLRK1     | Central memory CD8 |
| MSC       | Central memory CD8 |
| PYHIN1    | Central memory CD8 |
| RCAN2     | Central memory CD8 |
| RGS1      | Central memory CD8 |
| SLAMF1    | Central memory CD8 |
| SLFN11    | Central memory CD8 |
| ZEB2      | Central memory CD8 |
| BST2      | Cytotoxic cells    |
| BTN3A2    | Cytotoxic cells    |
| IL10RA    | Cytotoxic cells    |
| KLRB1     | Cytotoxic cells    |
| LAT2      | Cytotoxic cells    |
| LILRA2    | Cytotoxic cells    |
| SELL      | Cytotoxic cells    |
| SLAMF6    | Cytotoxic cells    |
| SLAMF7    | Cytotoxic cells    |
| C1QC      | DC                 |
| CCDC88A   | DC                 |
| CCL13     | DC                 |
| CCL3L1    | DC                 |
| CCL3L3    | DC                 |
| CD300E    | DC                 |
| CD86      | DC                 |
| CLEC1A    | DC                 |
| CLEC4C    | DC                 |
| CLEC5A    | DC                 |
| CLIC2     | DC                 |
| CSF2RA    | DC                 |
| FAM49A    | DC                 |
| FCGR1A    | DC                 |
| FN1       | DC                 |
| FSTL1     | DC                 |
| GPR109B   | DC                 |
| GPX3      | DC                 |
| HLA-DQA2  | DC                 |
| INHBA     | DC                 |
| LGMN      | DC                 |
| NGFR      | DC                 |

|          |                     |
|----------|---------------------|
| PDGFRL   | DC                  |
| PDPN     | DC                  |
| PRKAR2B  | DC                  |
| SIGLEC1  | DC                  |
| SIGLEC5  | DC                  |
| SLAMF9   | DC                  |
| STAB1    | DC                  |
| THBD     | DC                  |
| TNFAIP2  | DC                  |
| TTYH2    | DC                  |
| UBD      | DC                  |
| VCAM1    | DC                  |
| BMI1     | Effector memory CD4 |
| CASP3    | Effector memory CD4 |
| CNOT10   | Effector memory CD4 |
| COPB2    | Effector memory CD4 |
| DARS     | Effector memory CD4 |
| EXOSC9   | Effector memory CD4 |
| EZH2     | Effector memory CD4 |
| GDE1     | Effector memory CD4 |
| IFT74    | Effector memory CD4 |
| KLF5     | Effector memory CD4 |
| NDUFB9   | Effector memory CD4 |
| NUP205   | Effector memory CD4 |
| SHCBP1   | Effector memory CD4 |
| XRCC6    | Effector memory CD4 |
| APOBEC3H | Effector memory CD8 |
| ARHGAP10 | Effector memory CD8 |
| ATP10D   | Effector memory CD8 |
| BIRC3    | Effector memory CD8 |
| C3AR1    | Effector memory CD8 |
| CCL4     | Effector memory CD8 |
| CD244    | Effector memory CD8 |
| CD55     | Effector memory CD8 |
| CFLAR    | Effector memory CD8 |
| CMKLR1   | Effector memory CD8 |
| DAPP1    | Effector memory CD8 |
| DFNB31   | Effector memory CD8 |
| DRAM1    | Effector memory CD8 |
| EFNA5    | Effector memory CD8 |
| FCGR2C   | Effector memory CD8 |
| FCGR3A   | Effector memory CD8 |
| FCRL6    | Effector memory CD8 |
| FGR      | Effector memory CD8 |
| GPR114   | Effector memory CD8 |
| GZMH     | Effector memory CD8 |
| HAPLN3   | Effector memory CD8 |
| HLA-DMB  | Effector memory CD8 |
| HLA-DPA1 | Effector memory CD8 |
| HLA-DPB1 | Effector memory CD8 |

|         |                     |
|---------|---------------------|
| IFI16   | Effector memory CD8 |
| IKZF2   | Effector memory CD8 |
| IL15    | Effector memory CD8 |
| IL2RB   | Effector memory CD8 |
| JAKMIP1 | Effector memory CD8 |
| KLRD1   | Effector memory CD8 |
| LY96    | Effector memory CD8 |
| NFKBIA  | Effector memory CD8 |
| PLXNC1  | Effector memory CD8 |
| PPP4R1  | Effector memory CD8 |
| PTPN22  | Effector memory CD8 |
| RGS18   | Effector memory CD8 |
| SETD7   | Effector memory CD8 |
| SH2D1B  | Effector memory CD8 |
| SLA2    | Effector memory CD8 |
| STXBP1  | Effector memory CD8 |
| TLR5    | Effector memory CD8 |
| TYROBP  | Effector memory CD8 |
| CCL24   | Eosinophil          |
| CFD     | Eosinophil          |
| CREB3   | Eosinophil          |
| EGR1    | Eosinophil          |
| EPX     | Eosinophil          |
| FBXO16  | Eosinophil          |
| HFE     | Eosinophil          |
| HIVEP1  | Eosinophil          |
| HIVEP2  | Eosinophil          |
| MBP     | Eosinophil          |
| PRNP    | Eosinophil          |
| RNASE2  | Eosinophil          |
| RNASE3  | Eosinophil          |
| S100A4  | Eosinophil          |
| SIGLEC8 | Eosinophil          |
| ATP6V1A | iDC                 |
| C1QB    | iDC                 |
| CHST11  | iDC                 |
| CSF1    | iDC                 |
| DPYD    | iDC                 |
| FNDC3B  | iDC                 |
| GRP     | iDC                 |
| IL1RN   | iDC                 |
| INPP5F  | iDC                 |
| LPL     | iDC                 |
| LPXN    | iDC                 |
| MMD     | iDC                 |
| PLAU    | iDC                 |
| PLCB2   | iDC                 |
| RAB38   | iDC                 |
| RDX     | iDC                 |
| RRAGD   | iDC                 |



|          |                  |
|----------|------------------|
| TACSTD2  | iDC              |
| TGM2     | iDC              |
| TIMD4    | iDC              |
| TM7SF4   | iDC              |
| BANK1    | Immature B cells |
| CD22     | Immature B cells |
| CYBB     | Immature B cells |
| ETS1     | Immature B cells |
| FAM129C  | Immature B cells |
| FCRL1    | Immature B cells |
| FCRL2    | Immature B cells |
| FCRL3    | Immature B cells |
| FCRL5    | Immature B cells |
| FCRLA    | Immature B cells |
| HDAC9    | Immature B cells |
| HLA-DOB  | Immature B cells |
| HLA-DQA1 | Immature B cells |
| HVCN1    | Immature B cells |
| KIAA0226 | Immature B cells |
| NCF1     | Immature B cells |
| NCF1B    | Immature B cells |
| P2RY10   | Immature B cells |
| PNOC     | Immature B cells |
| SP100    | Immature B cells |
| STAP1    | Immature B cells |
| TAGAP    | Immature B cells |
| TXNIP    | Immature B cells |
| ZCCHC2   | Immature B cells |
| AIF1     | Macrophages      |
| CCL1     | Macrophages      |
| CCL14    | Macrophages      |
| CCL26    | Macrophages      |
| CD163    | Macrophages      |
| CD300LB  | Macrophages      |
| CNR1     | Macrophages      |
| CNR2     | Macrophages      |
| CPM      | Macrophages      |
| CSF3R    | Macrophages      |
| ENG      | Macrophages      |
| FCAR     | Macrophages      |
| IGF1     | Macrophages      |
| IL34     | Macrophages      |
| L1CAM    | Macrophages      |
| LILRA1   | Macrophages      |
| LILRA5   | Macrophages      |
| LRP1     | Macrophages      |
| MS4A7    | Macrophages      |
| MS4A8B   | Macrophages      |
| TREM1    | Macrophages      |
| TREML1   | Macrophages      |

|          |            |
|----------|------------|
| ACSL4    | Mast cells |
| ADAMTS3  | Mast cells |
| ADCYAP1  | Mast cells |
| ARHGAP15 | Mast cells |
| ATP8B4   | Mast cells |
| C19orf59 | Mast cells |
| CASQ1    | Mast cells |
| CLC      | Mast cells |
| CMA1     | Mast cells |
| CPA3     | Mast cells |
| CTSG     | Mast cells |
| DUSP14   | Mast cells |
| EGR3     | Mast cells |
| EMR1     | Mast cells |
| FST      | Mast cells |
| HDC      | Mast cells |
| HEY1     | Mast cells |
| KRT1     | Mast cells |
| LXN      | Mast cells |
| MEIS2    | Mast cells |
| MS4A2    | Mast cells |
| MS4A3    | Mast cells |
| NLRP3    | Mast cells |
| NTRK1    | Mast cells |
| PLAT     | Mast cells |
| PTGS1    | Mast cells |
| PTGS2    | Mast cells |
| RGS16    | Mast cells |
| SCG2     | Mast cells |
| SDPR     | Mast cells |
| SERPINB2 | Mast cells |
| SIGLEC14 | Mast cells |
| SIGLEC6  | Mast cells |
| SLC18A2  | Mast cells |
| SLC24A3  | Mast cells |
| TAL1     | Mast cells |
| TARP     | Mast cells |
| TIE1     | Mast cells |
| TIMP1    | Mast cells |
| TNFAIP6  | Mast cells |
| TSPAN4   | Mast cells |
| VAT1     | Mast cells |
| ATP5O    | mDC        |
| CBX1     | mDC        |
| DNAJC15  | mDC        |
| ENSA     | mDC        |
| FOXN3    | mDC        |
| PRCP     | mDC        |
| SSB      | mDC        |
| TPMT     | mDC        |

|          |                |
|----------|----------------|
| AICDA    | Memory B cells |
| CCNA2    | Memory B cells |
| CDKN3    | Memory B cells |
| CLCN5    | Memory B cells |
| ENPP1    | Memory B cells |
| FCER1A   | Memory B cells |
| FCRL4    | Memory B cells |
| MYC      | Memory B cells |
| RUNX2    | Memory B cells |
| SORL1    | Memory B cells |
| SOX5     | Memory B cells |
| STAT5A   | Memory B cells |
| STAT5B   | Memory B cells |
| TLR9     | Memory B cells |
| ACTR3    | Monocytes      |
| ANXA5    | Monocytes      |
| ARPC2    | Monocytes      |
| ATP6V1B2 | Monocytes      |
| BASP1    | Monocytes      |
| CD300LF  | Monocytes      |
| DAZAP2   | Monocytes      |
| EIF4A1   | Monocytes      |
| EIF4G2   | Monocytes      |
| EMP3     | Monocytes      |
| FCN1     | Monocytes      |
| FTL      | Monocytes      |
| GABARAP  | Monocytes      |
| HIF1A    | Monocytes      |
| LITAF    | Monocytes      |
| NCOA4    | Monocytes      |
| OLR1     | Monocytes      |
| RAB1A    | Monocytes      |
| RHOA     | Monocytes      |
| SAT1     | Monocytes      |
| SDCBP    | Monocytes      |
| SRGN     | Monocytes      |
| TEK      | Monocytes      |
| TMBIM6   | Monocytes      |
| UBE2D3   | Monocytes      |
| ABTB1    | Neutrophils    |
| AMPD2    | Neutrophils    |
| CAMP     | Neutrophils    |
| EMR4P    | Neutrophils    |
| FPR1     | Neutrophils    |
| FPR2     | Neutrophils    |
| GPR77    | Neutrophils    |
| MAEA     | Neutrophils    |
| PROK2    | Neutrophils    |
| SEC14L1  | Neutrophils    |
| SEPX1    | Neutrophils    |

|          |             |
|----------|-------------|
| SLC25A37 | Neutrophils |
| TNFSF14  | Neutrophils |
| TREML4   | Neutrophils |
| VNN2     | Neutrophils |
| XPO6     | Neutrophils |
| AKT3     | NK          |
| AXL      | NK          |
| CDH2     | NK          |
| CRTAM    | NK          |
| CYTH1    | NK          |
| FASLG    | NK          |
| GRB2     | NK          |
| KLRG1    | NK          |
| LILRB5   | NK          |
| LST1     | NK          |
| MAPK4    | NK          |
| NOTCH3   | NK          |
| PIK3CG   | NK          |
| PILRA    | NK          |
| PLCG2    | NK          |
| SIGLEC7  | NK          |
| SIGLEC9  | NK          |
| C11orf75 | NK56 bright |
| DYNLL1   | NK56 bright |
| HCP5     | NK56 bright |
| HDGFRP2  | NK56 bright |
| KRT86    | NK56 bright |
| MLST8    | NK56 bright |
| MYL6B    | NK56 bright |
| TAX1BP3  | NK56 bright |
| AKR7A3   | NK56 dim    |
| CLTB     | NK56 dim    |
| FAM27A   | NK56 dim    |
| GLS2     | NK56 dim    |
| GPRC5C   | NK56 dim    |
| GRIN1    | NK56 dim    |
| HLA-E    | NK56 dim    |
| KIR2DS4  | NK56 dim    |
| KLHL21   | NK56 dim    |
| KRT80    | NK56 dim    |
| MPL      | NK56 dim    |
| PHRF1    | NK56 dim    |
| PORCN    | NK56 dim    |
| PQBP1    | NK56 dim    |
| PSMC4    | NK56 dim    |
| TEX264   | NK56 dim    |
| UPP1     | NK56 dim    |
| BTN2A2   | NKT         |
| CD101    | NKT         |
| GNLY     | NKT         |

|           |         |
|-----------|---------|
| KIR2DL1   | NKT     |
| KIR2DL3   | NKT     |
| KIR3DL1   | NKT     |
| KIR3DL2   | NKT     |
| KLRC1     | NKT     |
| MICB      | NKT     |
| NCR1      | NKT     |
| NFATC2IP  | NKT     |
| TNFRSF11A | NKT     |
| CBX6      | pDC     |
| DAB2      | pDC     |
| DDX17     | pDC     |
| HIGD1A    | pDC     |
| IDH3A     | pDC     |
| IL3RA     | pDC     |
| MAGED1    | pDC     |
| NUCB2     | pDC     |
| OFD1      | pDC     |
| OGT       | pDC     |
| PDIA4     | pDC     |
| SERTAD2   | pDC     |
| SIRPA     | pDC     |
| SPCS3     | pDC     |
| TMED2     | pDC     |
| TMX1      | pDC     |
| UGCG      | pDC     |
| ZDHHC17   | pDC     |
| BATF      | T cells |
| BTLA      | T cells |
| CCL11     | T cells |
| CCL17     | T cells |
| CCL22     | T cells |
| CCL3      | T cells |
| CCL5      | T cells |
| CCL7      | T cells |
| CCR1      | T cells |
| CCR3      | T cells |
| CCR4      | T cells |
| CCR8      | T cells |
| CD1A      | T cells |
| CD1B      | T cells |
| CD1C      | T cells |
| CD1D      | T cells |
| CD1E      | T cells |
| CD247     | T cells |
| CD28      | T cells |
| CD3D      | T cells |
| CD3E      | T cells |
| CD3G      | T cells |
| CD69      | T cells |

|          |         |
|----------|---------|
| CD8A     | T cells |
| CXCR1    | T cells |
| CXCR4    | T cells |
| CXCR5    | T cells |
| CXCR6    | T cells |
| FGFBP2   | T cells |
| FLT3     | T cells |
| FOSL1    | T cells |
| GRAP2    | T cells |
| HLA-DRA  | T cells |
| HLA-DRB1 | T cells |
| HLA-DRB5 | T cells |
| HRH2     | T cells |
| IFNG     | T cells |
| IL10     | T cells |
| IL12B    | T cells |
| IL12RB1  | T cells |
| IL12RB2  | T cells |
| IL18R1   | T cells |
| IL18RAP  | T cells |
| IL1B     | T cells |
| IL21     | T cells |
| IL21R    | T cells |
| IL24     | T cells |
| IL26     | T cells |
| IL27     | T cells |
| IL2RA    | T cells |
| IL6      | T cells |
| IL7      | T cells |
| IRF4     | T cells |
| IRF8     | T cells |
| ITGAL    | T cells |
| ITK      | T cells |
| JAK2     | T cells |
| JAK3     | T cells |
| LAIR1    | T cells |
| LAT      | T cells |
| LAX1     | T cells |
| LCK      | T cells |
| LCP2     | T cells |
| LILRA3   | T cells |
| LILRA4   | T cells |
| LILRB1   | T cells |
| LILRB2   | T cells |
| LILRB3   | T cells |
| LILRB4   | T cells |
| MS4A4A   | T cells |
| NAPSB    | T cells |
| NFATC1   | T cells |
| NFKB2    | T cells |

|         |         |
|---------|---------|
| P2RY14  | T cells |
| PIK3CD  | T cells |
| POU2F2  | T cells |
| PRF1    | T cells |
| RUNX3   | T cells |
| SPI1    | T cells |
| STAT1   | T cells |
| STAT4   | T cells |
| TNF     | T cells |
| TPRG1   | T cells |
| TSLP    | T cells |
| UBASH3B | T cells |
| ZAP70   | T cells |
| B3GAT1  | TFH     |
| BCL6    | TFH     |
| CCR7    | TFH     |
| CD200   | TFH     |
| CD83    | TFH     |
| CD84    | TFH     |
| CDK5R1  | TFH     |
| FGF2    | TFH     |
| GPR18   | TFH     |
| PDCD1   | TFH     |
| ACP5    | TGD     |
| C1orf54 | TGD     |
| CARD8   | TGD     |
| CCL18   | TGD     |
| CD209   | TGD     |
| CD33    | TGD     |
| CECR1   | TGD     |
| CLEC10A | TGD     |
| CLEC4A  | TGD     |
| CSF1R   | TGD     |
| FCER1G  | TGD     |
| FCGR2A  | TGD     |
| FCGR2B  | TGD     |
| FCGR3B  | TGD     |
| FGF7    | TGD     |
| FGL2    | TGD     |
| FPR3    | TGD     |
| GM2A    | TGD     |
| GPNMB   | TGD     |
| HCK     | TGD     |
| HK3     | TGD     |
| LIPA    | TGD     |
| MARCO   | TGD     |
| MMP12   | TGD     |
| MNDA    | TGD     |
| MRC1    | TGD     |
| MS4A6A  | TGD     |

|         |     |
|---------|-----|
| NPL     | TGD |
| PLA2G7  | TGD |
| PLEK    | TGD |
| RAB23   | TGD |
| RNASE6  | TGD |
| SDC2    | TGD |
| SLAMF8  | TGD |
| SLC15A3 | TGD |
| SLC38A6 | TGD |
| SLC7A7  | TGD |
| SPP1    | TGD |
| TFEC    | TGD |
| TM6SF1  | TGD |
| TNFSF8  | TGD |
| TREM2   | TGD |
| TRPV2   | TGD |
| ADAM8   | Th1 |
| CCR5    | Th1 |
| CD151   | Th1 |
| CD48    | Th1 |
| CD52    | Th1 |
| CD53    | Th1 |
| CD6     | Th1 |
| CD68    | Th1 |
| CD7     | Th1 |
| CD96    | Th1 |
| CD97    | Th1 |
| EBI3    | Th1 |
| GPR84   | Th1 |
| HAVCR2  | Th1 |
| ICAM1   | Th1 |
| ICAM3   | Th1 |
| IGSF6   | Th1 |
| IL12A   | Th1 |
| IL7R    | Th1 |
| IRF1    | Th1 |
| ITGA4   | Th1 |
| ITGAM   | Th1 |
| ITGAX   | Th1 |
| ITGB2   | Th1 |
| ITGB4   | Th1 |
| ITGB7   | Th1 |
| LTA     | Th1 |
| LTB     | Th1 |
| METRNL  | Th1 |
| P2RX5   | Th1 |
| PTPRC   | Th1 |
| SPN     | Th1 |
| TBX21   | Th1 |
| TLR6    | Th1 |



|          |      |
|----------|------|
| TNFRSF1A | Th1  |
| TNFRSF9  | Th1  |
| TRAT1    | Th1  |
| ABP1     | Th17 |
| B4GALNT4 | Th17 |
| C2CD4A   | Th17 |
| C2CD4B   | Th17 |
| CA2      | Th17 |
| CCDC65   | Th17 |
| CEACAM3  | Th17 |
| CHRM3    | Th17 |
| DOC2B    | Th17 |
| F12      | Th17 |
| FURIN    | Th17 |
| GPR25    | Th17 |
| IL17A    | Th17 |
| IL17C    | Th17 |
| IL17F    | Th17 |
| IL17RC   | Th17 |
| IL17RE   | Th17 |
| IL23A    | Th17 |
| ILDR1    | Th17 |
| LONRF3   | Th17 |
| LTK      | Th17 |
| MOCOS    | Th17 |
| SH2D6    | Th17 |
| TNIP2    | Th17 |
| TRAF3IP2 | Th17 |
| YBX2     | Th17 |
| ASB2     | Th2  |
| CALD1    | Th2  |
| CCR2     | Th2  |
| CSRP2    | Th2  |
| DAPK1    | Th2  |
| DLC1     | Th2  |
| DNAJC12  | Th2  |
| DUSP6    | Th2  |
| GATA3    | Th2  |
| GNAI1    | Th2  |
| HTR2B    | Th2  |
| LAMP3    | Th2  |
| NRP2     | Th2  |
| OSBPL1A  | Th2  |
| PDE4B    | Th2  |
| PHLDA1   | Th2  |
| PLA2G4A  | Th2  |
| RAB27B   | Th2  |
| RBMS3    | Th2  |
| RNF125   | Th2  |
| SIGLEC10 | Th2  |

|          |      |
|----------|------|
| SKAP1    | Th2  |
| SMAD2    | Th2  |
| TMPRSS3  | Th2  |
| UBASH3A  | Th2  |
| CCL19    | Treg |
| CD34     | Treg |
| CD72     | Treg |
| CTLA4    | Treg |
| FOXP3    | Treg |
| GADD45B  | Treg |
| GEM      | Treg |
| IL1RL1   | Treg |
| IL9R     | Treg |
| MADCAM1  | Treg |
| MYH10    | Treg |
| NCF2     | Treg |
| RCSD1    | Treg |
| RYR1     | Treg |
| SELE     | Treg |
| SELP     | Treg |
| SFRP1    | Treg |
| SIT1     | Treg |
| TIGIT    | Treg |
| TLR10    | Treg |
| TLR2     | Treg |
| TLR7     | Treg |
| TLR8     | Treg |
| TRAF1    | Treg |
| WIPF1    | Treg |
| TGFB1    | Treg |
| ADORA3   | MDSC |
| AG2      | MDSC |
| ARG1     | MDSC |
| BIN2     | MDSC |
| C1orf162 | MDSC |
| CAPS     | MDSC |
| CD117    | MDSC |
| CD11B    | MDSC |
| CD11C    | MDSC |
| CD124    | MDSC |
| CD14     | MDSC |
| CD15     | MDSC |
| CD163L1  | MDSC |
| CD1D1    | MDSC |
| CD21     | MDSC |
| CD23     | MDSC |
| CD274    | MDSC |
| CD31     | MDSC |
| CD35     | MDSC |
| CD40     | MDSC |

|          |      |
|----------|------|
| CD43     | MDSC |
| CD44     | MDSC |
| CD66B    | MDSC |
| COX2     | MDSC |
| CR2      | MDSC |
| CTR9     | MDSC |
| EBP      | MDSC |
| FAM48A   | MDSC |
| FAM70B   | MDSC |
| FCER2    | MDSC |
| FCGRT    | MDSC |
| FERMT3   | MDSC |
| FLOT1    | MDSC |
| FLT1     | MDSC |
| GIMAP7   | MDSC |
| GLI4     | MDSC |
| GNA15    | MDSC |
| GPR34    | MDSC |
| GPSM3    | MDSC |
| HLA-DR   | MDSC |
| IDO      | MDSC |
| IKZF1    | MDSC |
| IL12     | MDSC |
| IL13     | MDSC |
| IL18BP   | MDSC |
| IL1R     | MDSC |
| IL4RA    | MDSC |
| INPP5D   | MDSC |
| ITGA3    | MDSC |
| KDR      | MDSC |
| KRIT1    | MDSC |
| LGALS3   | MDSC |
| MGAT4A   | MDSC |
| NAIP     | MDSC |
| NEK3     | MDSC |
| NFSF13   | MDSC |
| NOG      | MDSC |
| PARVG    | MDSC |
| PDRG1    | MDSC |
| PECAM1   | MDSC |
| PIK3R5   | MDSC |
| PPP1R2P4 | MDSC |
| PSAP     | MDSC |
| PTGES2   | MDSC |
| PTPRE    | MDSC |
| RNASE1   | MDSC |
| RP11     | MDSC |
| S100A8   | MDSC |
| S100A9   | MDSC |
| SELPLG   | MDSC |

|         |      |
|---------|------|
| SLA     | MDSC |
| SLC36A1 | MDSC |
| SLC44A1 | MDSC |
| ST8SIA4 | MDSC |
| STAT3   | MDSC |
| STAT6   | MDSC |
| TBXAS1  | MDSC |
| TFGFB1  | MDSC |
| TFGFB2  | MDSC |
| TFGFB3  | MDSC |
| TFGFB5  | MDSC |
| TFRC    | MDSC |
| TGFB2   | MDSC |
| TPP1    | MDSC |
| VTCN1   | MDSC |

**Table S3. Univariate and multivariate Cox Hazards Analysis of Patients with molecular phenotypes**

| Variables                                         | Univariate Cox model |       | Multivariate Cox model* |       |       |
|---------------------------------------------------|----------------------|-------|-------------------------|-------|-------|
|                                                   | HR (95% CI)          | p     | HR (95% CI)             | p     | sign† |
| Tem CD8                                           | 0.46 (0.16-0.85)     | 0.026 | 0.61 (0.12-0.88)        | 0.044 | *     |
| Tem CD4                                           | 0.54 (0.43-0.98)     | 0.038 | 0.59 (0.35-1.01)        | 0.051 | ·     |
| Treg                                              | 2.25 (1.57-3.69)     | 0.015 | 2.11 (1.24-3.76)        | 0.038 | *     |
| NK                                                | 0.64 (0.42-0.88)     | 0.057 | 0.69 (0.35-0.93)        | 0.065 | ·     |
| Act DC                                            | 0.71 (0.43-1.12)     | 0.031 | 0.71 (0.33-1.19)        | 0.042 | *     |
| MDSC                                              | 2.39 (1.62-4.06)     | 0.023 | 2.15 (1.33-4.21)        | 0.037 | *     |
| Act CD4                                           | 0.42 (0.33-0.87)     | 0.402 | 0.52 (0.12-1.05)        | 0.621 |       |
| Act CD8                                           | 0.36 (0.12-0.93)     | 0.052 | 0.45 (0.23-0.78)        | 0.059 | ·     |
| Tcm CD4                                           | 0.57 (0.32-1.12)     | 0.701 | 0.45 (0.11-1.32)        | 0.881 |       |
| Tcm CD8                                           | 0.31 (0.09-0.82)     | 0.023 | 0.52 (0.24-0.96)        | 0.036 | *     |
| Th1                                               | 0.65 (0.12-0.78)     | 0.041 | 0.66 (0.32-0.87)        | 0.068 | ·     |
| Th2                                               | 0.62 (0.31-1.15)     | 0.458 | 0.69 (0.23-1.48)        | 0.651 |       |
| Th17                                              | 2.35 (1.16-3.66)     | 0.057 | 2.64 (1.02-3.69)        | 0.066 | ·     |
| Tgd                                               | 0.56 (0.33-1.05)     | 0.552 | 0.44 (0.15-1.26)        | 0.651 |       |
| Tfh                                               | 0.61 (0.12-1.45)     | 0.991 | 0.75 (0.41-1.69)        | 0.875 |       |
| Act B                                             | 0.66 (0.28-1.15)     | 0.899 | 0.67 (0.24-1.56)        | 0.901 |       |
| Imm B                                             | 0.65 (0.23-1.31)     | 0.657 | 0.46 (0.30-1.67)        | 0.664 |       |
| Mem B                                             | 1.47 (1.01-3.99)     | 0.356 | 1.12 (0.93-3.68)        | 0.401 |       |
| Mac                                               | 2.57 (1.17-5.58)     | 0.097 | 2.01 (1.68-4.69)        | 0.125 |       |
| Mast                                              | 1.97 (1.05-3.59)     | 0.039 | 2.14 (0.89-3.70)        | 0.114 |       |
| Mon                                               | 0.64 (0.43-1.35)     | 0.879 | 0.45 (0.10-1.24)        | 0.993 |       |
| pDC                                               | 1.15 (0.67-2.01)     | 0.705 | 1.41 (0.45-2.96)        | 0.781 |       |
| iDC                                               | 0.77 (0.36-1.09)     | 0.845 | 0.46 (0.12-1.15)        | 0.658 |       |
| mDC                                               | 0.57 (0.24-1.06)     | 0.997 | 0.47 (0.22-1.01)        | 0.778 |       |
| NKT                                               | 0.54 (0.12-0.93)     | 0.652 | 0.61 (0.30-1.16)        | 0.933 |       |
| Eos                                               | 0.51 (0.23-1.28)     | 0.678 | 0.64 (0.11-1.34)        | 0.752 |       |
| Neu                                               | 0.78 (0.52-1.16)     | 0.999 | 0.98 (0.23-1.36)        | 0.999 |       |
| NK CD56dim                                        | 0.66 (0.35-0.98)     | 0.773 | 0.46 (0.22-1.19)        | 0.801 |       |
| NK CD56bright                                     | 0.55 (0.41-1.25)     | 0.871 | 0.75 (0.43-1.39)        | 0.923 |       |
| MSI status (MSI-H vs. MSS)                        | 0.85 (0.49-1.98)     | 0.821 |                         |       |       |
| Mutation rate (Hypermutated vs. Non-hypermutated) | 0.94 (0.46-1.86)     | 0.835 |                         |       |       |
| Methylation subtype (CIMP-H vs. CIMP-L/CIMPneg)   | 1.28 (0.94-3.68)     | 0.635 |                         |       |       |
| Tumor site (Right vs. Left colon)                 | 0.58 (0.32-1.06)     | 0.547 |                         |       |       |

\* including molecular phenotypes (MSI, mutation Rate, methylation subtype, tumor site) as binary covaria

† p<0.001 ... \*\*\*, 0.001≤p<0.01 ... \*\*, 0.01≤p<0.05 ... \*, 0.05≤p<0.1 ... ·

**Table S4:** List of predicted neo-antigens

| Peptide sequence(s)    | # Patients | Chromosome:StartPosition   | Genes      |
|------------------------|------------|----------------------------|------------|
| TEYKLVVVGAV            | 28         | 12:25398284                | KRAS       |
| QASPALASL              | 19         | 11:117789313               | TMPRSS13   |
| TQLARFFPI              | 19         | 17:56435161--17:56435252   | RNF43      |
| SPAQASPAL              | 16         | 11:117789313--11:117789312 | TMPRSS13   |
| AQASPALASL             | 16         | 11:117789313               | TMPRSS13   |
| RFFPITPPV              | 15         | 17:56435161--17:56435252   | RNF43      |
| GADGVGKSAL             | 14         | 1:115258747--12:25398284   | KRAS--NRAS |
| MQLCTQLARFF            | 14         | 17:56435252--17:56435161   | RNF43      |
| FVAEFPGSEL             | 13         | 19:1065018                 | ABCA7      |
| ARFFPITPPV             | 13         | 17:56435161--17:56435252   | RNF43      |
| FFDETRQL               | 13         | 3:178916876                | PIK3CA     |
| WRFCSGVL               | 13         | 8:120220776                | MAL2       |
| WLPPMFLYL              | 13         | 8:120220776                | MAL2       |
| MQLCTQLARF             | 12         | 17:56435252--17:56435161   | RNF43      |
| RRQPCAHLWL, RRQPCAHL   | 11         | 19:39330958--19:39330959   | HNRNPL     |
| WRFCSGVLSGF            | 11         | 8:120220776                | MAL2       |
| ARAVHLPPEL             | 11         | 2:239050033                | KLHL30     |
| YLYYKDGSCS             | 11         | 8:120220776                | MAL2       |
| QLARFFPI               | 11         | 17:56435161                | RNF43      |
| RRLGFLATAWL            | 11         | 10:17659131                | PTPLA      |
| LTITSLSLPI             | 11         | 5:140215022                | PCDHA7     |
| FLATAWLTF              | 10         | 10:17659131                | PTPLA      |
| LTITSLSL               | 10         | 5:140215022                | PCDHA7     |
| ARAVHLPPELL            | 10         | 2:239050033                | KLHL30     |
| FFDETRQLCDL            | 10         | 3:178916876                | PIK3CA     |
| SEITKQEKDFL            | 10         | 3:178936091                | PIK3CA     |
| SRQPACAHGL             | 10         | 19:39330959--19:39330958   | HNRNPL     |
| MRRNMISTL, MRRNMISTLQM | 9          | 16:2059622                 | ZNF598     |
| IMMSWMPPL              | 9          | 1:204228411                | PLEKHA6    |
| YVDPGSDHF              | 9          | 18:48591919                | SMAD4      |
| YKDGSCS                | 9          | 8:120220776                | MAL2       |
| WRPLTITL               | 9          | 17:577539                  | TP53       |
| KIGDFGLATEK            | 9          | 7:140453136                | BRAF       |
| FTPLSAHPVPV            | 9          | 1:204228411                | PLEKHA6    |
| SPAQASPALA             | 9          | 11:117789313               | TMPRSS13   |
| TRAPSSARWF             | 9          | 8:120220776                | MAL2       |
| LLGRNSFEVHV            | 9          | 17:577120                  | TP53       |
| FWLPPMFL, FWLPPMFLYL   | 9          | 8:120220776                | MAL2       |
| SAMPSAMGVAL            | 9          | 1:204228411                | PLEKHA6    |
| KRRGGPPSPPL            | 9          | 17:56435161                | RNF43      |
| VRHDPQARAV             | 9          | 2:239050033                | KLHL30     |
| RAVHLPPELLS            | 9          | 2:239050033                | KLHL30     |
| VVGADGVGK              | 8          | 1:115258747--12:25398284   | KRAS--NRAS |

|                                               |   |                            |          |
|-----------------------------------------------|---|----------------------------|----------|
| WSLGRSFLPL                                    | 8 | 16:2059622                 | ZNF598   |
| VTSATWTM                                      | 8 | 16:2059622                 | ZNF598   |
| YLLDGLVRL                                     | 8 | 19:17837512                | MARPIS   |
| CSMRRNMISTL                                   | 8 | 16:2059622                 | ZNF598   |
| TSATWTMMSCL                                   | 8 | 16:2059622                 | ZNF598   |
| AAEFPGSEL                                     | 8 | 19:1065018                 | ABCA7    |
| VRTSMLTL                                      | 8 | 1:204228411                | PLEKHA6  |
| WLPPMFL                                       | 8 | 8:120220776                | MAL2     |
|                                               |   | 5:112175626--5:112175596-- |          |
| KYLKIKHLLL                                    | 8 | 5:112175594--5:112175605-- | APC      |
|                                               |   | 5:112175572--5:112175606   |          |
| RQLCDLRLF                                     | 8 | 3:178916876                | PIK3CA   |
| ARHGGWTTKM                                    | 8 | 3:178952085                | PIK3CA   |
| VAAEFPGSEL                                    | 8 | 19:1065018                 | ABCA7    |
| FPALACSL                                      | 8 | 2:36825137                 | FEZ2     |
| MMSWMPPL, SIMMSWMPPL                          | 8 | 1:204228411                | PLEKHA6  |
| FPITPPVWHIL                                   | 8 | 17:56435161                | RNF43    |
| QARAVHLPPEL                                   | 8 | 2:239050033                | KLHL30   |
| RAEWHPLGAL                                    | 8 | 16:2059622                 | ZNF598   |
| SSAWRFCSGVL                                   | 8 | 8:120220776                | MAL2     |
| WRTSAMPASAM                                   | 8 | 1:204228411                | PLEKHA6  |
| QASPAQASPAL                                   | 8 | 11:117789313               | TMPRSS13 |
| VVGAVGVGK, VVGAVGVGK                          | 8 | 12:25398284                | KRAS     |
| FFPITPPV                                      | 8 | 17:56435161                | RNF43    |
| RMQLCTQLARF                                   | 7 | 17:56435161                | RNF43    |
| VRTSMLTLLPM, VRTSMLTLL                        | 7 | 1:204228411                | PLEKHA6  |
|                                               |   |                            |          |
| HPHHKQAGPV, GPVAHQHLV, HPHHKQAGPVA, GPVAHQHLV | 7 | 13:21562948                | LATS2    |
|                                               |   |                            |          |
| GRNSFEVHV                                     | 7 | 17:577120                  | TP53     |
| EEFFDETRQL                                    | 7 | 3:178916876                | PIK3CA   |
| RAHRVQLL                                      | 7 | 18:3452223                 | TGIF1    |
| ALPPPPPPV                                     | 7 | 10:105110740               | PCGF6    |
| RAVHLPPEL                                     | 7 | 2:239050033                | KLHL30   |
| MRSSELPLVL                                    | 7 | 18:56887507                | GRP      |
| YELSSTSV                                      | 7 | 13:21562832                | LATS2    |
| LTSAPSAQQSL                                   | 7 | 3:114058003                | ZBTB20   |
| SMRRNMISTL                                    | 7 | 16:2059622                 | ZNF598   |
| SELREAHGGRL, AEFPGSEL                         | 7 | 19:1065018                 | ABCA7    |
| HAQCPSPVL                                     | 7 | 8:145625525                | CPSP1    |
| RTSMLTLLPM                                    | 7 | 1:204228411                | PLEKHA6  |
| ASDAYPSAF                                     | 7 | 1:29138975                 | OPRD1    |
| CRVTPMTRRTV                                   | 7 | 16:2059622                 | ZNF598   |
| RRNMISTLQM, RRRNMISTL                         | 7 | 16:2059622                 | ZNF598   |
| ITPPVWHIL                                     | 7 | 17:56435252--17:56435161   | RNF43    |

|                                |   |                                                    |          |
|--------------------------------|---|----------------------------------------------------|----------|
| MMSWMPPLA, IMMSWMPPLA          | 7 | 1:204228411                                        | PLEKHA6  |
| SRLLCRPL                       | 7 | 7:128587374                                        | IRF5     |
| SRPLCSRPL                      | 7 | 7:128587381--7:128587374--7:128587374--7:128587381 | IRF5     |
| TRCATAAL                       | 7 | 16:2059622                                         | ZNF598   |
| MRATVPPPSL                     | 7 | 19:39330959                                        | HNRNPL   |
| YELSSTSVQW                     | 7 | 13:21562832                                        | LATS2    |
| SMLTLLPM                       | 7 | 1:204228411                                        | PLEKHA6  |
| TMMSCLSTCAA, MMSCLSTCAA        | 7 | 16:2059622                                         | ZNF598   |
| ARSCARWSL, ARWSLGRSFL          | 7 | 16:2059622                                         | ZNF598   |
| ARAPTAVPFAF                    | 7 | 1:204228411                                        | PLEKHA6  |
| NQRPLTITL                      | 7 | 17:577538                                          | TP53     |
| MAPTPPSTPM                     | 7 | 1:204228411                                        | PLEKHA6  |
| VASAWLTVL, AVASAWLTV, VASAWLTV | 7 | 1:228504670                                        | OBSCN    |
| SPAQASPALAS                    | 7 | 11:117789313                                       | TMPRSS13 |
| MAPETTLWL                      | 7 | 22:20130522--22:20130515                           | ZDHHC8   |
| ARAEWGL, ARAEWGLAL             | 7 | 16:2059622                                         | ZNF598   |
| LARFFPITPPV                    | 7 | 17:56435161                                        | RNF43    |
| VVAVATWR, CVVAVATWR            | 7 | 19:49611319                                        | SNRNP70  |
| FLATAWLTFY                     | 7 | 10:17659131                                        | PTPLA    |
| RRHLQPHDAL                     | 7 | 7:42005678                                         | GLI3     |
| SAMPSAMGV                      | 7 | 1:204228411                                        | PLEKHA6  |
| RRAAHSRV                       | 7 | 18:3452223                                         | TGIF1    |
| REEFFDETRQL                    | 7 | 3:178916876                                        | PIK3CA   |
| SRPTGRPATV                     | 7 | 16:2059622                                         | ZNF598   |
| SALARPVSAAL                    | 6 | 7:75677504                                         | MDH2     |
| HRAAHSRV                       | 6 | 18:3452223                                         | TGIF1    |
| WVRHDPQARAV                    | 6 | 2:239050033                                        | KLHL30   |
| MAPTPPSTPMI                    | 6 | 1:204228411                                        | PLEKHA6  |
| SQSIMMSW                       | 6 | 1:204228411                                        | PLEKHA6  |
| RRRRRCPGGRV                    | 6 | 17:3627473                                         | GS2      |
| LLAPATEHSSL                    | 6 | 17:72350412                                        | KIF19    |
| KRRRLGFL                       | 6 | 10:17659149--10:17659131--10:17659131--10:17659149 | PTPLA    |
|                                |   | 5:112175766--5:112175756--                         |          |
| LQMDFLVHPA                     | 6 | 5:112175752--5:112175772--5:112175770--5:112175761 | APC      |
| SAHPVPVL                       | 6 | 1:204228411                                        | PLEKHA6  |
| TTRCATAAL                      | 6 | 16:2059622                                         | ZNF598   |
| CLLDILDTAGK                    | 6 | 1:115256530                                        | NRAS     |
| SELPLVLLAL                     | 6 | 18:56887507                                        | GRP      |
| TRFLTVPV                       | 6 | 7:139167934                                        | KLRG2    |
| SATQASMTL                      | 6 | 22:20130515--22:20130522                           | ZDHHC8   |

|                                   |   |                                                  |            |
|-----------------------------------|---|--------------------------------------------------|------------|
| CTQLARFFPI                        | 6 | 17:56435161                                      | RNF43      |
| ARWSLGRSF                         | 6 | 16:2059622                                       | ZNF598     |
| MRAGGCCHAL                        | 6 | 10:46999601                                      | GPRIN2     |
| LRPGHLHL                          | 6 | 8:145625525                                      | CPSP1      |
| RELYDRGPPL                        | 6 | 19:49850473                                      | TEAD2      |
| QRPLTITL                          | 6 | 17:577538                                        | TP53       |
| FAVLGTVMVM                        | 6 | 1:150530506--1:150529443                         | ADAMTSL4   |
| RRGDPRLKT, LRRGDPRLKT             | 6 | 1:204228411                                      | PLEKHA6    |
| MENSHPPPTTT, MENSHPPT             | 6 | 12:122242658                                     | SETD1B     |
| TSMLTLLPM                         | 6 | 1:204228411                                      | PLEKHA6    |
| AAAGAVFL                          | 6 | 10:71906150                                      | TYSDN1     |
|                                   |   |                                                  |            |
| HVAHAAAAL, VAHAAAAL               | 6 | 2:43452464--2:43452491--2:43452244--2:43452439-- | ZFP36L2    |
|                                   |   |                                                  |            |
| APATEHSSL                         | 6 | 17:72350412                                      | KIF19      |
| TEHSSL, TEHSSLHL                  | 6 | 17:72350412                                      | KIF19      |
| LFPHPWTTDM                        | 6 | 2:171572940                                      | SP5        |
| AAALPPPPPPV                       | 6 | 10:105110740                                     | PCGF6      |
| RAPEVPRCAM                        | 6 | 22:20130515--22:20130522                         | ZDHHC8     |
| FTPLSAHPV                         | 6 | 1:204228411                                      | PLEKHA6    |
| SSYSRVVALV                        | 6 | 2:137507501                                      | CBR3       |
| SEITKQEKDF                        | 6 | 3:178936091                                      | PIK3CA     |
| STQHPVPPSTL                       | 6 | 17:17119709                                      | FLCN       |
| ALARPVSAAL                        | 6 | 7:75677504                                       | MDH2       |
| ARPGPWRTSAM                       | 6 | 1:204228411                                      | PLEKHA6    |
| RRHAQCPSVPL                       | 6 | 8:145625525                                      | CPSP1      |
| GSMSSAAV                          | 6 | 16:2059622                                       | ZNF598     |
| FAALANAL                          | 6 | 19:1004896                                       | GRIN3B     |
| RTSAMPASAM                        | 6 | 1:204228411                                      | PLEKHA6    |
| VLGSHLAV                          | 6 | 1:204228411                                      | PLEKHA6    |
| AMPSAMGV                          | 6 | 1:204228411                                      | PLEKHA6    |
| SRLFHPWTTDM                       | 6 | 2:171572940                                      | SP5        |
| AEFPGSELREA                       | 6 | 19:1065018                                       | ABCA7      |
|                                   |   |                                                  |            |
| GRRASVPCRP, RRASVPCRP, TRQECRRASV | 6 | 1:204228411                                      | PLEKHA6    |
|                                   |   |                                                  |            |
| TRHHHPAHFH                        | 6 | X:54209387                                       | FAM120C    |
| RTLACVCAL                         | 6 | 19:17837425                                      | MARPIS     |
| SSAWRFCSGV                        | 6 | 8:120220776                                      | MAL2       |
| RSCVVAVATWR                       | 6 | 19:49611319                                      | SNRNP70    |
| DTAGKEEY                          | 5 | 1:115256530--12:25380277                         | KRAS--NRAS |
| GRSVAVDPEL                        | 5 | 17:40706906                                      | HSD17B1    |
| CRKVLRL                           | 5 | 19:47878858                                      | DHX34      |



|                                               |   |                                                    |          |
|-----------------------------------------------|---|----------------------------------------------------|----------|
| RPLLHLHL                                      | 4 | 17:70119909--17:70120314--17:70120194--17:70120345 | SOX9     |
| LRCPLTAPL, ARDLRCLP                           | 4 | 12:121432115--12:121432118                         | HNFI1A   |
| TRKQTKVLWPL, LRPPPLSL, TRKQTKVL               | 4 | 5:137803132                                        | EGR1     |
| PRAHRVQL                                      | 4 | 18:3452223                                         | TGIF1    |
| RPTGRPATV                                     | 4 | 16:2059622                                         | ZNF598   |
| HPHRRHLWGPF                                   | 4 | 17:70120345--17:70120194--17:70120314--17:70119909 | SOX9     |
| SRPRSASL                                      | 4 | 5:137803132                                        | EGR1     |
| GRIIHLAL                                      | 4 | 19:6737481                                         | GPR108   |
| MRPPRAGPLGL                                   | 4 | 22:19968971                                        | ARVCF    |
| ARLVATPAL                                     | 4 | 22:20130515--22:20130522                           | ZDHH8    |
| SMQDPLLSL                                     | 4 | 3:168833257                                        | MECOM    |
| LTSRPLTL                                      | 4 | 12:58025103                                        | B4GALNT1 |
| HTSTVHCM                                      | 4 | 4:153249384                                        | FBXW7    |
| RSLELGAAPL, MRRSLELGAAP                       | 4 | 19:33167455                                        | RG59BP   |
| APFRVNHAV                                     | 4 | 5:112175350--5:112175346--5:112175484--5:112175351 | APC      |
| HRVVRPRACM                                    | 4 | 16:50745399                                        | NOD2     |
| CARWSLGRSF                                    | 4 | 16:2059622                                         | ZNF598   |
| RRPWNSFTSL, VRRPWNSFTSL                       | 4 | 16:50745399                                        | NOD2     |
| MTACSLARLV                                    | 4 | 22:20130515--22:20130522                           | ZDHH8    |
| CAMAPETTL                                     | 4 | 22:20130515--22:20130522                           | ZDHH8    |
| MNWRPILTI                                     | 4 | 17:7577539                                         | TP53     |
| RSRSWTSK                                      | 4 | 7:100283942--7:100285170                           | GIGYF1   |
| ATFSSVPLV, FSSVPLVASI                         | 4 | 1:22191454                                         | HSPG2    |
| RRPHSCLADV, RRRPHSCLADVL                      | 4 | 5:112175351--5:112175346--5:112175424              | APC      |
| QRASRMRRWWM, MRAQRASRM, SRMRRWWMNAA, SRMRRWWM | 4 | 19:871222                                          | MED16    |
| SELPLVLLALV, SELPLVLL, SELPLVLLA              | 4 | 18:56887507                                        | GRP      |
| RAAPSALGAL                                    | 4 | 6:18122506                                         | NHLRC1   |
| VVRHCPHHER                                    | 4 | 17:7578406                                         | TP53     |
| FPSAGANA                                      | 4 | 1:29138975                                         | OPRD1    |
| SAYLGRITL, SAYLGRITLLV, SAYLGRITLL            | 4 | 10:890939                                          | LARP4B   |
| FANNSGFV, WAFANNSGF, WAFANNSGFV, FANNSGFVAEL  | 4 | 9:140008750                                        | DPP7     |
| WRLRGGAL                                      | 4 | 16:705360                                          | WDR90    |

|                                                                          |   |                                                    |          |
|--------------------------------------------------------------------------|---|----------------------------------------------------|----------|
| RMTSLSASTSL                                                              | 4 | 17:17119709                                        | FLCN     |
| TSPPRRSPALR, TTTTSSPR                                                    | 4 | 12:122242658                                       | SETD1B   |
| EPAPAPATY                                                                | 4 | 16:84224967                                        | ADAD2    |
| SRPPVTQRL                                                                | 4 | 2:70315174                                         | PCBP1    |
| ERYYPVQRLPF, TRERYYPVQRL, QRLPFSTV, ERYYPVQRL                            | 4 | 2:242674803                                        | D2HGDH   |
| LARLVATPAL                                                               | 4 | 22:20130515--22:20130522                           | ZDHH8    |
| ARRESRFWAL, SRMPARRESRF                                                  | 4 | 18:34205516                                        | FHOD3    |
| NPVLVNEV, LPNEVLQEA                                                      | 4 | 19:45867259                                        | ERC2     |
| APANPEPSA                                                                | 4 | 1:41976328                                         | HIVEP3   |
| YLWPSRTL                                                                 | 4 | 14:89878534                                        | FOXN3    |
| LMVEAVAMM                                                                | 4 | X:135956575--X:135956571                           | RBMX     |
| KVHLNMTFR, KVHLNMTFRFR, KVVLRHPK                                         | 4 | 5:112175346--5:112175351--5:112175350              | APC      |
| RELLLVGRY, GERELLLVGRY                                                   | 4 | 17:18918510--17:18918511                           | SLC5A10  |
| LRGPPRKL                                                                 | 4 | 16:15802687                                        | MYH11    |
| SSRQHSALM, HRSALMTF, SRQHSALMTF, HRSALMTFL, SRQHSALM, HRSALMTFL, SRQHSAL | 4 | 16:50745399                                        | NOD2     |
| LRARGGTI                                                                 | 4 | 12:122242658                                       | SETD1B   |
| ARTARSAL, VRARTARSAL                                                     | 4 | 18:34205516                                        | FHOD3    |
| IRSEGDQLL, IRSEGDQLLIV                                                   | 4 | 19:51843808                                        | VSIG10L  |
| VRQQLRL                                                                  | 4 | 2:43452439--2:43452342--2:43452464--2:43452244     | ZFP36L2  |
| SLAALQLPA, QLPAAAPPV, ALQLPAAAPPV, SLAALQLPAA                            | 4 | 2:43452244--2:43452532--2:43452464--2:43452342     | ZFP36L2  |
| CTACVERCPWK                                                              | 4 | 10:29760116                                        | SVIL     |
| QAWWPARRGPL                                                              | 4 | 3:114058003                                        | ZBTB20   |
| AAAPPVRL                                                                 | 4 | 2:43452464--2:43452439--2:43452342                 | ZFP36L2  |
| NQRPIITI                                                                 | 4 | 17:7577538                                         | TP53     |
| LLFLGLRGL, LLLRLLFL, LLLRLLFLGL, FLGLRGLHAL                              | 4 | 2:43452244--2:43452532--2:43452464--2:43452342     | ZFP36L2  |
| RESRFWALQA                                                               | 4 | 18:34205516                                        | FHOD3    |
| APAPAQPSAT, APAQPSAT                                                     | 4 | 9:124855211                                        | TTLL11   |
| SPVRRRRRCPG                                                              | 4 | 17:3627473                                         | GS2      |
| RRGRRRL                                                                  | 4 | 2:43452464--2:43452244--2:43452439--2:43452342     | ZFP36L2  |
| AEATNGEARAA                                                              | 4 | 16:88599696                                        | ZFPM1    |
| FEPSPAEPL, MDFEPSPAEPL                                                   | 4 | 2:39187190                                         | ARHGEF33 |
| SLASCASVAI, SLASCASV                                                     | 4 | 1:150529443--1:150530506                           | ADAMTSL4 |
| VLQMDFLV                                                                 | 4 | 5:112175752--5:112175772--5:112175761--5:112175766 | APC      |

|                                                   |   |                                                    |          |
|---------------------------------------------------|---|----------------------------------------------------|----------|
| RLMAPVGSV                                         | 4 | 17:48433967                                        | XYLT2    |
| FVVADLLL                                          | 4 | 1:154304153                                        | ATP8B2   |
| RLLLLLPLLW                                        | 4 | 19:41858921                                        | TGFB1    |
| LMNLATADLLL                                       | 4 | 19:17000632                                        | F2RL3    |
| MRPLPGRIEV, MRPLPGRI                              | 4 | 18:658064                                          | C18orf56 |
| SPRRAGPT                                          | 4 | 1:155178782                                        | MTX1     |
| MTEVVRHCPH                                        | 4 | 17:7578406                                         | TP53     |
| AARAEWPLAL                                        | 4 | 16:2059622                                         | ZNF598   |
| KEAYGRHQREI                                       | 4 | 14:32561296                                        | ARHGAP5  |
| GMNQRPILTI                                        | 4 | 17:7577538                                         | TP53     |
| FWLPPPMF                                          | 4 | 8:120220776                                        | MAL2     |
| TAVPAFTPL, RAPTAVPF                               | 4 | 1:204228411                                        | PLEKHA6  |
| LLPRALPSLL                                        | 4 | 18:34205516                                        | FHOD3    |
| APFRVNHAVEV                                       | 4 | 5:112175493--5:112175424--5:112175351--5:112175484 | APC      |
| RTSMLTLL                                          | 4 | 1:204228411                                        | PLEKHA6  |
| REMVSNMSGPS, REMVSNMS, REMVSNMSG, KELRALREM       | 4 | 13:46288145                                        | SPERT    |
| GLGVEVPGV                                         | 4 | 1:227922918                                        | JMJ4     |
| LSYHRLPL, LPLWAALPL                               | 4 | 2:43452491--2:43452464--2:43452439                 | ZFP36L2  |
| SSATQASMTL, HSSATQASM                             | 4 | 22:20130522--22:20130515                           | ZDHH8    |
| GAVGVGKSAL                                        | 4 | 12:25398284                                        | KRAS     |
| LEQMLHScri                                        | 4 | X:56591874                                         | UBQLN2   |
| LWDVLLSRELF                                       | 4 | 1:15850613                                         | CASP9    |
| VRSTVCAMDSL, VRSTVCAM, LRPVRLQKY                  | 4 | 12:121432118--12:121432115                         | HNFI1A   |
| FPPRSPC, FPPRSPCPA                                | 4 | 8:120220776                                        | MAL2     |
| KLVVVGAAV                                         | 4 | 12:25398284                                        | KRAS     |
| RSFPAASPSGL                                       | 4 | 20:23066469                                        | CD93     |
| TPMTRRTVGT, WPGIACRVTPM, MTRRTVGT RSA, TPMTRRTVGT | 4 | 16:2059622                                         | ZNF598   |
| ATEHSSLSL                                         | 4 | 17:72350412                                        | KIF19    |
| KRNTGTGLSL                                        | 4 | 11:8751889                                         | ST5      |
| WATWLSLAL, RSRRWATWLSL, RSRRWATWL                 | 4 | 10:124895627                                       | HMX3     |
| CMGGMNWR                                          | 4 | 17:7577539                                         | TP53     |
| SLPTRPRL, LRPPPLSL, RLLPLTRPRL                    | 4 | 5:137803132                                        | EGR1     |
| ALRARGGTI, SPRRSPAL                               | 4 | 12:122242658                                       | SETD1B   |
| GPHRAHRVQL                                        | 4 | 18:3452223                                         | TGIF1    |
| RLLPLWAAL, RLLPLWAALPL                            | 4 | 2:43452464--2:43452491--2:43452532--2:43452342     | ZFP36L2  |
| LGLFATAWLT                                        | 4 | 10:17659131                                        | PTPLA    |

|                                            |   |                                                    |          |
|--------------------------------------------|---|----------------------------------------------------|----------|
| MSRPLRRWL, MSRPLRRWLL                      | 4 | 1:85040070                                         | CTBS     |
| GRRTSLAALQ, RRTSLAAL, RRTSLAALQ, GRRTSLAAL | 4 | 2:43452342--2:43452439--2:43452244--2:43452464     | ZFP36L2  |
| RQLCDLRL                                   | 4 | 3:178916876                                        | PIK3CA   |
| WSLGRSFL                                   | 4 | 16:2059622                                         | ZNF598   |
| LRPCSGARPV, RRPCSGARPV                     | 4 | 16:50745399                                        | NOD2     |
| VPLPTPPPPPL                                | 4 | 1:109792735                                        | CELSR2   |
| RRHAQCPV                                   | 4 | 8:145625525                                        | CPSF1    |
| TPPPPPPL                                   | 4 | 1:109792735                                        | CELSR2   |
| LASCASVAI                                  | 4 | 1:150529443--1:150530506                           | ADAMTSL4 |
| HTSTVHCMLH                                 | 4 | 4:153249384                                        | FBXW7    |
| CRPACTCISM                                 | 4 | 17:48433967                                        | XYLT2    |
| HLVGSYPPA                                  | 4 | 17:48433967                                        | XYLT2    |
| TEHSSLSLH, TEHSSLSLHS                      | 4 | 17:72350412                                        | KIF19    |
| LLSPLDSSPL                                 | 4 | 3:77657038                                         | ROBO2    |
| LRPGLHL                                    | 4 | 8:145625525                                        | CPSF1    |
| GRPDMLRL                                   | 4 | 2:43452439--2:43452342--2:43452464--2:43452244     | ZFP36L2  |
| LRWLFPPTGGSV                               | 4 | 20:60887581                                        | LAMA5    |
| KYLKIKHLL, KYLIKHL                         | 4 | 5:112175594--5:112175606--5:112175605--5:112175572 | APC      |
| CSMRNNMI                                   | 4 | 16:2059622                                         | ZNF598   |
| AEASTGAW, AEASTGAWTA                       | 4 | 18:34205516                                        | FHOD3    |
| KYSRWIFL                                   | 4 | 5:112175760--5:112175752--5:112175756              | APC      |
| GRTPTRTLM                                  | 4 | 17:48433967                                        | XYLT2    |
| GLPAGAAVQ                                  | 4 | 2:43452244--2:43452532--2:43452464--2:43452342     | ZFP36L2  |
| GIACRVTPM                                  | 4 | 16:2059622                                         | ZNF598   |
| CEICVKSRRV                                 | 4 | 18:34205516                                        | FHOD3    |
| LPRCGCSASSA, LPRCGCSA                      | 4 | 16:2059622                                         | ZNF598   |
| SEKYLKIKHLL                                | 4 | 5:112175594--5:112175553--5:112175596--5:112175626 | APC      |
| CTPPAYLL                                   | 4 | 19:17837512                                        | MAP1S    |
| RASVPCPRM                                  | 4 | 1:204228411                                        | PLEKHA6  |
| MASAPGERL                                  | 4 | 1:248020556                                        | TRIM58   |
| VRSEALTPL                                  | 4 | 19:17393015                                        | ANKLE1   |
| YSATHRIHEI                                 | 4 | 19:11978669                                        | ZNF439   |
| FGPCTPPAYL                                 | 4 | 19:17837512                                        | MAP1S    |
| WTMRMKWAPL                                 | 4 | 7:100285170                                        | GIGYF1   |
| CRPRSRTTF, RPRSRTTF                        | 4 | 16:50745399                                        | NOD2     |
| ARHPDQL                                    | 4 | 2:43452464--2:43452244--2:43452439--2:43452342     | ZFP36L2  |
| FPVNGPPRDSL                                | 4 | 1:213031948                                        | FLVCR1   |
| ARALPPDVHLL                                | 4 | 22:24121378                                        | MMP11    |





|                                                                                    |   |                                       |           |
|------------------------------------------------------------------------------------|---|---------------------------------------|-----------|
| RPACTCISM                                                                          | 3 | 17:48433967                           | XYLT2     |
| RERTAWAQL                                                                          | 3 | 16:50745399                           | NOD2      |
| LVASISAVSL, SSVPLVASI                                                              | 3 | 1:22191454                            | HSPG2     |
| ILARLVATPAL, ILARLVATPA                                                            | 3 | 22:20130522--22:20130515              | ZDHH8     |
| GRSSRQPL                                                                           | 3 | 10:124895627                          | HMX3      |
| LPHALLAPSL                                                                         | 3 | 1:228559450                           | OBSCN     |
| TSSPRRSPAL                                                                         | 3 | 12:22242658                           | SETD1B    |
| MPSAMGVAL                                                                          | 3 | 1:204228411                           | PLEKHA6   |
| APSGHEGILAL                                                                        | 3 | 11:76751542                           | B3GNT6    |
| RTSLAALQL                                                                          | 3 | 2:43452439--2:43452464                | ZFP36L2   |
| NWRPILTI                                                                           | 3 | 17:7577539                            | TP53      |
| GRTPTRL, TRLMAPVGSV                                                                | 3 | 17:48433967                           | XYLT2     |
| LQMIWAFY                                                                           | 3 | 1:35972480                            | KIAA0319L |
| LRQARRGPPGL                                                                        | 3 | 3:183951135                           | VWA5B2    |
| APPSTRMMAT, APPSTRMM, APPSTRMMA                                                    | 3 | 2:227661664                           | IRS1      |
| SPFRSVGV, SPFRSVGVA                                                                | 3 | 17:7577036--17:7577065--17:7576881    | TP53      |
| FPISFIPG, TPGGAAPFL, STPPGGAAP, FPISFIPGA                                          | 3 | 1:154942910                           | SHC1      |
| CPLCSRWL                                                                           | 3 | 3:183951135                           | VWA5B2    |
| LCMFPEPLTI                                                                         | 3 | 2:46987060                            | SOCS5     |
| YVDPGSGDH                                                                          | 3 | 18:48591919                           | SMAD4     |
| RHWLWVWVW, RHWLWVWV                                                                | 3 | 12:53207602                           | KRT4      |
| AEWPLALA                                                                           | 3 | 16:2059622                            | ZNF598    |
| HPADPQPPA, HPADPQPPAL                                                              | 3 | 17:70120194--17:70120345--17:70119909 | SOX9      |
| LRSSRRGL                                                                           | 3 | 10:124895627                          | HMX3      |
| KLMHTKIDKLR                                                                        | 3 | 10:91497569                           | KIF20B    |
| RASPSAVCL                                                                          | 3 | 20:23066469                           | CD93      |
| NVFLNLHFV, FVLNLHFV, YVYIETNVFV, LLYVYIETNV, VLNLHFV, YIETNVFV, FVLNLHFV, YIETNVFV | 3 | 18:12699829                           | CEP76     |
| TVHCMHLHEKR                                                                        | 3 | 4:153249384                           | FBXW7     |
| MAVLPALL                                                                           | 3 | 11:107992346                          | ACAT1     |
| KTSTIALF                                                                           | 3 | 8:25154087                            | DOCK5     |
| CSRLCSR                                                                            | 3 | 7:128587374                           | IRF5      |
| RRETEPCMLL, ARRETEPCMLL                                                            | 3 | 1:156814343--1:156814053              | INSRR     |
| RRRRCPPGRV                                                                         | 3 | 17:3627473                            | GS62      |
| ALFAALANAL                                                                         | 3 | 19:1004896                            | GRIN3B    |
| MTFLLASWCV                                                                         | 3 | 16:50745399                           | NOD2      |
| SQSGAWTM                                                                           | 3 | 7:100285170                           | GIGYF1    |
| YGMWGGGCWVW                                                                        | 3 | 8:145689659                           | CYHR1     |
| KLFNEMAERH, KLFNEMAER                                                              | 3 | 22:25315953                           | SGSM1     |

|                                                                 |   |                                       |          |
|-----------------------------------------------------------------|---|---------------------------------------|----------|
| TMNDSKHK, LTMNDSKHK, KLESAPK                                    | 3 | 2:203420130                           | BMPR2    |
| YAARGRGQWAV                                                     | 3 | 10:1094906                            | ID1I     |
| TSFPFLSGL                                                       | 3 | 16:30736370                           | SRCAP    |
| SSHRFCFHQY                                                      | 3 | 7:91732038                            | AKAP9    |
| WLLQAQAAGV                                                      | 3 | 1:6614391                             | NOL9     |
| LAGSLSTM, FGVPLGSLCL                                            | 3 | 1:204228411                           | PLEKHA6  |
| YMMKKGKRDKL, KLPFLLLL, KRDKLPFL, KRDKLPFL                       | 3 | 10:63958149                           | RTKN2    |
| LEGGTPPMPF, LEGGTPPVM, LEGGTPPW                                 | 3 | 10:100186987                          | HPS1     |
| WRVSPRPLSPL, WRVSPRPL                                           | 3 | 13:111368164                          | ING1     |
| MTSMTSMTSM, TSMSTSM                                             | 3 | 22:38483198--22:38483204--22:38483174 | BAIAP2L2 |
| HVHPSRLL                                                        | 3 | 10:114900984                          | TCF7L2   |
| QQTGKSPV                                                        | 3 | 19:58879976                           | ZNF837   |
| VAFPRPRF                                                        | 3 | 19:1231142                            | C19orf26 |
| FRRLVSTL, RRLVSTLNF, FFRRLVSTL, KFFRRLVSTL, KFFRRLV, FRRLVSTLNF | 3 | 10:94243045                           | IDE      |
| RPLCSRLL                                                        | 3 | 7:128587374                           | IRF5     |
| AVASAWLTVL                                                      | 3 | 1:228504670                           | OBSCN    |
| RRDDDGTL                                                        | 3 | 4:24801315                            | SOD3     |
| TRWKPLQTVRL, TRWKPLQTV                                          | 3 | 6:151673000                           | AKAP12   |
| FLPPMHCPTA                                                      | 3 | 22:20130515--22:20130522              | ZDHHC8   |
| GEWELCRA                                                        | 3 | 1:200880978                           | C1orf106 |
| RPIAQWHL                                                        | 3 | 11:1858572                            | SYT8     |
| MAAMRLMPKF, MAAMRLMPKFL                                         | 3 | 2:27248517                            | MAPRE3   |
| FRFRGRV, VRFRFRGRV, FRFRGRV, FRFRGRV, FRFRGRV                   | 3 | 19:54974318                           | LENG9    |
| RMWNTVQK                                                        | 3 | 4:62910205                            | LPHN3    |
| MSPMTPMTPM, MSPMTPMTPM                                          | 3 | 22:38483155                           | BAIAP2L2 |
| STNPNFPPF, ISTNPNFPPF, STNPNFPPF                                | 3 | 17:10258071                           | MYH13    |
| KSSCLQIHR                                                       | 3 | 19:44778796--19:44778797              | ZNF233   |
| FTFCDVFWL, KLIRFLCF, FTFCDVFWL, KLIRFLCF, FYKLIRFLCF            | 3 | 11:111742146                          | ALG9     |
| LYYKDGSC                                                        | 3 | 8:120220776                           | MAL2     |
| RAPSSFHPL, RAPSSFHPLV                                           | 3 | 1:228559450                           | OBSCN    |
| RVPVSTTL, VWPVSTTL                                              | 3 | 6:13206135                            | PHACTR1  |
| KLAACARECV                                                      | 3 | 17:2266799                            | SGSM2    |
| SALPQGRAPL                                                      | 3 | 18:34205516                           | FHOD3    |

|                                                       |   |                                                    |         |
|-------------------------------------------------------|---|----------------------------------------------------|---------|
| LPWHIQIGI, LPWHIQIGI                                  | 3 | 12:66622063                                        | IRAK3   |
| FSNVNYYVH                                             | 3 | 16:88599701--16:88599696--16:88599696--16:88599701 | ZFPM1   |
| WLGPAVAPA, TLWLGPAV                                   | 3 | 22:20130515--22:20130522                           | ZDHH8   |
| LRLQRSLEL, IRKQRQHL, LRLQRSLL                         | 3 | 10:61828580                                        | ANK3    |
| SRRWATWLSLA                                           | 3 | 10:124895627                                       | HMX3    |
| HLWGPFFPA                                             | 3 | 17:70120314--17:70120194--17:70120345              | SOX9    |
| RVLLSCAR                                              | 3 | 10:135186806                                       | ECHS1   |
| HRPLCQRFPPL, SRHAHRPL                                 | 3 | 16:14346300                                        | MKL2    |
| SWTPALRTM                                             | 3 | 3:52551362--3:52550119                             | STAB1   |
| ETRQLCDLR                                             | 3 | 3:178916876                                        | PIK3CA  |
| SRCSSFLPL, SRCSSFL                                    | 3 | 1:156814343--1:156814053                           | INSRR   |
| VAPPTPPLLL, LLLSLHPSL                                 | 3 | 2:204305619                                        | RAPH1   |
| HVWSHHTL                                              | 3 | 19:990281                                          | WDR18   |
| ASVAPATL                                              | 3 | 22:20130522--22:20130515                           | ZDHH8   |
| VRAGNPAVAAL                                           | 3 | 3:139258508                                        | RBP1    |
| NAPQLTITSL                                            | 3 | 5:140215022                                        | PCDHA7  |
| MAHPPHYL, IMAHPPHYL                                   | 3 | 1:55081756                                         | FAM151A |
| FANNSGFVA                                             | 3 | 9:140008750                                        | DPP7    |
| TLWGVMTSL                                             | 3 | 17:17119709                                        | FLCN    |
| LPPMFYLY, LPPMFYLY                                    | 3 | 8:120220776                                        | MAL2    |
| FQEEPMTGFYV                                           | 3 | 16:28847350--16:28847356                           | ATXN2L  |
| SRKRIVI, SRKRIVINI                                    | 3 | 10:63958149                                        | RTKN2   |
| KSHHRVVF                                              | 3 | 18:34205516                                        | FHOD3   |
| AALANALL, FAALANALLSA                                 | 3 | 19:1004896                                         | GRIN3B  |
| LPAPFRVNA, VVRLPAPFR, VVRLPAPF                        | 3 | 5:112175351--5:112175346--5:112175350              | APC     |
| KRTKCTF                                               | 3 | 10:89717770                                        | PTEN    |
| SEGAETPRI, AESEGAETPRI                                | 3 | 19:51843808                                        | VSIG10L |
| FMQEFYKILRF, FYKLIRFLCF, KLIRFLCF, KLIRFLCF, FYKLIRFL | 3 | 11:111742146                                       | ALG9    |
| KQMNDARHGGW                                           | 3 | 3:178952085                                        | PIK3CA  |
| RMMRRQWSL                                             | 3 | 6:116836954                                        | FAM26E  |
| SREERLWF                                              | 3 | 9:101900288                                        | TGFBRI  |
| RTGPRTTTATM                                           | 3 | 16:2059622                                         | ZNF598  |
| GRNSFEVCV                                             | 3 | 17:7577121                                         | TP53    |
| YGPPTSL                                               | 3 | 19:39330958                                        | HNRNPL  |
| YPSAFPSAG, FPSAGANAS                                  | 3 | 1:29138975                                         | OPRD1   |
| FTLGAQPRFL                                            | 3 | 8:144810138                                        | FAM83H  |
| RQPCAHGLW                                             | 3 | 19:39330959--19:39330958                           | HNRNPL  |
| RLWRARRPFL, RAWRRPFL, RAWRRPFL, RAWRRPFLMM            | 3 | 22:18300932                                        | MICAL3  |
| MSPSLDLY, YEMSPSLDLY                                  | 3 | 9:134183379                                        | PPAPDC3 |

|                                              |   |                                                |          |
|----------------------------------------------|---|------------------------------------------------|----------|
| GEAVAPAL, GEAVAPALL                          | 3 | 8:8860620                                      | ERI1     |
| RAGTRGSL                                     | 3 | 16:2059622                                     | ZNF598   |
| LLAPPPSAPL                                   | 3 | 14:75230947                                    | YLPM1    |
| SPTECLGHPV                                   | 3 | 19:10202224                                    | C19orf66 |
| SQNDQSL                                      | 3 | 21:30701851                                    | BACH1    |
| REMVSNMSGP, KELRALREMV, ALREMVSNM            | 3 | 13:46288145                                    | SPERT    |
| QSGAWTMRMK, QSGAWTMRMK, QSGAWTMRMK, GAWTMRMK | 3 | 7:100283942--7:100285170                       | GIGYF1   |
| GSELPLVLL                                    | 3 | 18:56887507                                    | GRP      |
| TPRIRSEGDQ                                   | 3 | 19:51843808                                    | VSI10L   |
| SELREAHG, SELREAHGG                          | 3 | 19:1065018                                     | ABCA7    |
| FARRCEPPEA                                   | 3 | 17:79899272                                    | MYADM2   |
| TADLLAL, TADLLALAL                           | 3 | 19:17000632                                    | FRL3     |
| FLHPCKIALF, FLHPCKIAL                        | 3 | 10:85978958                                    | CDHR1    |
| MAPVGSVM                                     | 3 | 17:48433967                                    | XYLT2    |
| GEKTEIQL                                     | 3 | 2:203420130                                    | BMPR2    |
| LRELYDRGPP                                   | 3 | 19:49850473                                    | TEAD2    |
| RMPARRSRF                                    | 3 | 18:34205516                                    | FHOD3    |
| MRMRWWMNA, MRMRWWMNA                         | 3 | 19:871222                                      | MED16    |
| ATGSSPGK                                     | 3 | 20:23618427                                    | CST3     |
| IQDFIFVMP                                    | 3 | 5:72199545                                     | TNPO1    |
| WLVLVLEPV, LLLVWLV                           | 3 | 3:66550762--3:66550756--3:66550756--3:66550762 | LRIG1    |
| CTYPTQKPF                                    | 3 | 8:39091459                                     | ADAM32   |
| RTLACVCALLV                                  | 3 | 19:17837425                                    | MAP1S    |
| ASAPTSPL                                     | 3 | 22:46449891                                    | C22orf26 |
| FTRAERLTL, TRAERLTL                          | 3 | 11:72408055                                    | ARAP1    |
| KRSSQSRSPV                                   | 3 | 18:34205516                                    | FHOD3    |
| ASRPPVTQRL                                   | 3 | 2:70315174                                     | PCBP1    |
| YMLLWVENL                                    | 3 | 14:103593950                                   | TNFAIP2  |
| LLRFSMRV, WLPSPMTALL                         | 3 | 14:20846338                                    | TEP1     |
| RRRHPRAL, RRRHPRAL, RRRHPRAL, RRRHPRAL       | 3 | 8:145106939                                    | OPLAH    |
| WPDTHPTCAL                                   | 3 | 22:20130522                                    | ZDHH8    |
| STVHCMHLHEK, STVHCMHLH, TVHCMHLHEK           | 3 | 4:153249384                                    | FBXW7    |
| WTRRRDPRRA                                   | 3 | 1:155178782                                    | MTX1     |
| LLSAPCAQVL                                   | 3 | 19:1004896                                     | GRIN3B   |
| VLSLTSR                                      | 3 | 17:56448298                                    | RNF43    |
| CRRIWSTV                                     | 3 | 17:11998898                                    | MAP2K4   |
| RMQLCTQL                                     | 3 | 17:56435161--17:56435252                       | RNF43    |















|                                                                            |        |                                       |                                       |                                                                                                                                   |             |                                           |                                        |
|----------------------------------------------------------------------------|--------|---------------------------------------|---------------------------------------|-----------------------------------------------------------------------------------------------------------------------------------|-------------|-------------------------------------------|----------------------------------------|
| SPFRKHFRPGT, SPFRKHFRPG,<br>MENISPRKHF, NISPRKHF,<br>FRKHFRPGTV, ENISPRKHF | 2      | 17:7577065--17:7576881                | TP53                                  | RQYMDKILTI, YMDKILTL,<br>YMDKILTI                                                                                                 | 2           | 17:29858706                               | RAB11FIP4                              |
| LLPTASFL, SLLPKNPRTL,<br>TLPTASFL, FLGWASAQTA,<br>FLGWASAQ, LLPKNPRTL      | 2      | 17:73501069                           | CASKIN2                               | QWVMHLCW, NQWVMHLCW<br>LRLLLLLLPL, MPPSGLRLLL<br>RELEKILVF, LEKKILVF                                                              | 2<br>2      | 2:230661315<br>19:41858921<br>1:37947226  | TRIP12<br>TGF1<br>ZC3H12A<br>SOX9      |
| ETATAGAPPA, ETATAGAPPAL                                                    | 2      | 7:100285170                           | GIGYF1                                | QEQAARQAA, QEQAARQA<br>VSADSGLLV, SADSGLLV,<br>VSADSGLL                                                                           | 2<br>2      | 17:70117710--17:70117715<br>16:624114     | PIGQ                                   |
| VFSPSLQNHYL, FSPSLQNHYL,<br>GVFSPSLQNHY                                    | 2      | 17:42232679                           | C17orf53                              | SWAPKTSV<br>LEYNLVC<br>AVALQSPL, RAGNPAAAL                                                                                        | 2<br>2<br>2 | 1:156715104<br>6:56915605<br>3:139258508  | HDGF<br>KIAA1586<br>RBP1               |
| RQMGSSLLVSM, VSMKNPYHL,<br>RQMGSSLL, SMKNPYHL,<br>KRQMGSSLLV               | 2      | 10:63958149                           | RTKN2                                 | KMKKAHFLKTW, FLPSAAQKM                                                                                                            | 2           | 16:68835781                               | CDH1                                   |
| AMAPETTLW, MAPETTLW<br>SLRTDCLLAV, SLRTDCLLAV                              | 2      | 22:20130522--22:20130515              | ZDHC8<br>PLK2                         | FPERSRVRM, RSRVRRML,<br>RVRRLAGSV, FPERSRVRRL,<br>RSRVRRLA                                                                        | 2           | 2:242149010                               | ANO7                                   |
| QMIWAFYLKMM,<br>LQMIWAFYLKM, YLKMMYHIF,<br>QMIWAFYLKM                      | 2      | 1:35972480                            | KIAA0319L                             | MNGGGASLNL                                                                                                                        | 2           | 7:100285170                               | GIGYF1                                 |
| AAAALLL, AHAAAALLL<br>ILFSSVYF, LFSSVYF                                    | 2<br>2 | 2:43452439--2:43452464<br>1:111216188 | ZFP36L2<br>KCNA3                      | TSMKMKMGY, MSKMKMGY                                                                                                               | 2           | 12:41967381                               | PDZRN4                                 |
| MSPPGRTQL, SMSPPGRTQL,<br>KSMSPPGRTQL                                      | 2      | 12:124848228                          | NCOR2                                 | YAALLTKTNI<br>TRMPGIPAGL                                                                                                          | 2<br>2      | 3:7620629<br>17:61781804                  | GRM7<br>STRADA                         |
| MQWNNKMMAM,<br>TMQWNNKMMAM                                                 | 2      | 3:77657038                            | ROBO2                                 | KRNYLSELM, KRNYLSEL<br>MSISLVMAI, YMSISLVM                                                                                        | 2<br>2      | 1:39759288<br>2:241569692                 | MACF1<br>GPR35                         |
| VRRKVPRAWL,<br>RRKVPRAWL                                                   | 2      | 2:43452464--2:43452439                | ZFP36L2                               | KAARKARDREL<br>SRDGPARPYRL                                                                                                        | 2<br>2      | 19:2226772<br>X:153039502                 | DOT1L<br>PLXNB3                        |
| NRKPHPTF                                                                   | 2      | 5:174156219                           | MSX2<br>LUC7L2,<br>C7orf55-<br>LUC7L2 | SRDKLPRPPL<br>DPQARAVHL                                                                                                           | 2<br>2      | 1:207195389<br>2:239050033                | C1orf16<br>KLHL30                      |
| TEYARVTF, TEYARVTFSTV                                                      | 2      | 7:139056179                           | ADCYAP1                               | LLSSSWAL, ALALLSSSWAL,<br>ALLSSSWAL                                                                                               | 2           | 12:14019044                               | GRIN2B                                 |
| YRPAGRRDVTH, RRDVTHGIL,<br>GRRDVTHGIL                                      | 2      | 18:908273                             | LRRK2<br>MDN1                         | IPASLNDTAL<br>FYTLVSEGLV                                                                                                          | 2<br>2      | 10:15255561<br>5:140481456                | FAM171A1<br>PCDHB3                     |
| RTTCHSIL                                                                   | 2      | 12:40713870                           | LRRK2                                 | WLPSPRQKTL, LLLASGAPRY,<br>WLPSPRQKTL, LPSRQKTL,LL,<br>WLPSPRQKTL                                                                 | 2           | 16:30505572                               | ITGAL                                  |
| AAFFNFVM, LAFFNFVM                                                         | 2      | 6:90415853                            | NEB                                   | KYEQLALDL, KYEQLALDL,<br>QLALDLFSECY, YEQLALDL,<br>REAKYEQLAL, REAKYEQLA,<br>REAKYEQL                                             | 2           | 11:2435956                                | TRPM5                                  |
| KTAGNQISOR                                                                 | 2      | 2:152390743                           | PIGK                                  | FAAARVDVF                                                                                                                         | 2           | 2:179472135                               | TTN                                    |
| QFYSFNIMAL                                                                 | 2      | 1:77627340                            | CASP8AP2<br>WNT9A                     | TFCDVFWL, CFTFCDVFWLL,<br>CFTFCDVFW, RFLCFTFCDVF,<br>TFCDVFWLL, CFTFCDVF                                                          | 2           | 11:111742146                              | ALG9                                   |
| ILDNYLQADTV                                                                | 2      | 6:90578192                            | ADAM9                                 | SAPCLHGASCL                                                                                                                       | 2           | 9:126128253                               | CRB2                                   |
| WQWGAETTL                                                                  | 2      | 1:228111954                           | GOLPH3                                | RRPIAQWHPL, ARRPIAQWHPL                                                                                                           | 2           | 11:1858572                                | SYT8                                   |
| YQMDVYKEPL                                                                 | 2      | 8:38874818                            | F2RL3<br>PTPLA<br>DHX57<br>IARS2      |                                                                                                                                   |             |                                           |                                        |
| HIYQMDVY, HIYQMDVY                                                         | 2      | 5:32126695                            |                                       |                                                                                                                                   |             |                                           |                                        |
| HYQLRNVWERL, LRNVWERL,<br>YQLRNVWERL                                       | 2      | 19:17000632                           |                                       |                                                                                                                                   |             |                                           |                                        |
| LATADLLL, NLATADLLLAL                                                      | 2      | 10:17659131                           |                                       |                                                                                                                                   |             |                                           |                                        |
| GFLATAWLF                                                                  | 2      | 2:39074185                            |                                       |                                                                                                                                   |             |                                           |                                        |
| FPVDQFFLKM                                                                 | 2      | 1:220267581                           |                                       |                                                                                                                                   |             |                                           |                                        |
| MRWGLRPL, LRPLGPGAAAL                                                      | 2      |                                       |                                       |                                                                                                                                   |             |                                           |                                        |
| SEVLAAGA, SEVLAAGAVF,<br>SEVLAAGAV                                         | 2      | 10:71906150                           | TYSND1                                | VSRATQLAF                                                                                                                         | 2           | 10:12136141                               | DHTKD1                                 |
| FQMTGSTL, YSFLTTFQM,<br>TTFQMTGSTL                                         | 2      | 6:71004213                            | COL9A1                                | MVEDKAL, VEDKALF<br>EEYIIQTL, WEYIIQT,<br>WEYIIQTL, EEYIIQTL,<br>EEYIIQTL, WEYIIQTL,<br>WEYIIQTL, EEYIIQTL,<br>EEYIIQTL, EEYIIQTL | 2<br>2      | 2:169746017<br>6:118596709                | SPC25<br>SLC35F1                       |
| EADSKAY, ITEADSKAY                                                         | 2      | 14:32561296                           | ARHGAP5                               | EIRQLSSKTL                                                                                                                        | 2           | 14:75230947                               | YLPM1                                  |
| MFFVAISF, YMFFVAL                                                          | 2      | 12:63541343                           | AVPR1A                                | YIIRREGAM, YIIRREGAMGK                                                                                                            | 2           | 5:45303797                                | HCN1                                   |
| IYMFVAISF, YMFVAISFKT                                                      | 2      | 3:5809788                             | FLNB                                  | KTDPAPEPQFK                                                                                                                       | 2           | 16:74773946                               | FA2H                                   |
| TFQRAPLKF                                                                  | 2      | 2:43452439--2:43452491                | ZFP36L2                               | SQNFALTKHHW,<br>FALTKHHWLIL, FALTKHHWL,<br>ALTKHHWLI                                                                              | 2           | 8:32453511                                | NRG1                                   |
| RAVPHLSYHR                                                                 | 2      | 13:109661386                          | MYO16                                 | HSRVVPSR, AAHSRVVPSR                                                                                                              | 2           | 18:3452223                                | TGIF1                                  |
| FFSRSHLDF, DFFSRSHLDF,<br>FSRSHLDFSPY                                      | 2      | 22:19839750                           | C22orf29                              | WTEPECGF                                                                                                                          | 2           | 2:202344861                               | STRADB                                 |
| RQQGPHIPI, CRQQGPHIPI                                                      | 2      | 5:112174117                           | APC                                   | NSVIKCDGFY, VIKCDGFY                                                                                                              | 2           | 1:173155919                               | TNFSF4                                 |
| SENQIGHVLCL, SENQIGHVL                                                     | 2      | 9:126128253                           | CRB2                                  | KENTLIL                                                                                                                           | 2           | 10:100995386                              | HPSE2                                  |
| APCLHGASCL                                                                 | 2      | 11:31436427                           | DNAJC24                               | FWSQFFL, SYLKTMYSSLF,<br>FLQCCHHHH, MYSSLFWSQF,<br>YSSLFWSQF, KTYMYSSLF,<br>YSSLFWSQFF, YLKTMYSSLF,<br>KTYMYSSLF                  | 2<br>2      | 6:102503432                               | GRIK2                                  |
| VEECVQKFIK                                                                 | 2      | 9:214706                              | C9orf66                               | IPTEKLREM                                                                                                                         | 2           | 11:61290608                               | SYT7                                   |
| SGYWGRRAL                                                                  | 2      | 10:104176197--10:104176203            | PSD                                   | REHREWEI, REWEIQLVN,<br>REWEIQL, REWEIQLVNES,<br>REHREWEIQL                                                                       | 2           | 7:139056179                               | LUC7L2,<br>C7orf55-<br>LUC7L2<br>ZDHC8 |
| WPHSSEDLTL, WPHSSEDL,<br>WPHSSEDL                                          | 2      | 11:111742146                          | ALG9                                  | WPDTHPTCI                                                                                                                         | 2           | 22:20130522                               |                                        |
| RTEHTTSSM                                                                  | 2      | 1:203037706                           | PPFIA4                                | LGKQYWI, QYWPIAF,<br>ELGKQYWI                                                                                                     | 2           | 3:30713643                                | TGFBR2                                 |
| FNHNTLAL, FNHNTLALIL,<br>ALDENFNHNTL, FNHNTLAL                             | 2      | 3:77657038                            | ROBO2                                 | RRVEPQTPWV                                                                                                                        | 2           | 6:26091204                                | HFE                                    |
| FLARSWNT                                                                   | 2      | 1:32800539                            | MARCKSL1                              | EEAALCPA                                                                                                                          | 2           | 17:7462459                                | TNFSF13                                |
| ILFQEAFOI, FOIERPVL                                                        | 2      | 14:55429791                           | WDHD1                                 | KAHAFVVQK, HAFVVQK<br>LPEALHEAL, LPEALHEA                                                                                         | 2<br>2      | 8:144997927<br>11:64083221                | PLEC<br>ESRR                           |
| SRSWKLIL, KYASRSWKL,<br>KYASRSWKLIL                                        | 2      | 16:1250389                            | CACNA1H                               | YSELSGDV                                                                                                                          | 2           | 1:115267948                               | CSDE1                                  |
| RRELVPCTL                                                                  | 2      | 12:121432118--12:121432115            | HNFA                                  | WWPARRGPL                                                                                                                         | 2           | 3:114058003                               | ZBTB20                                 |
| RPVRLQKYPQA                                                                | 2      | 9:2824764                             | KIAA0020                              | MNGGGASL                                                                                                                          | 2           | 7:100285170                               | GIGYF1                                 |
| MARPRGTG, GMARPRGTG                                                        | 2      | 2:43452439--2:43452244                | ZFP36L2                               | PEWKCSPL, PEWKCSPL<br>AQRPRGHPAL, QRPRGHPAL<br>RPRPARPPA, RAGPRRPPA,<br>LPRAGPRRPPA                                               | 2<br>2<br>2 | 11:10328153<br>11:76751585<br>16:88599701 | ADM<br>B3GT6<br>ZFPM1                  |
| VRGLLVGLV                                                                  | 2      | 8:104337567                           | FZD6                                  | VPLRIHFCV, CPVHRPPW,<br>SPVPLRIHF                                                                                                 | 2           | 7:128852004                               | SMO                                    |
| GRNQEKLNKFM                                                                | 2      | 3:119720928                           | GSK3B                                 | KLAEFLTS, KLAEFLTSWI<br>KSYWEDYHQF                                                                                                | 2           | 5:138643806                               | MATR3                                  |
| KLDCSDELVTI                                                                | 2      | 10:119134615                          | PDZ8                                  | HVAHVHCYQY                                                                                                                        | 2           | 4:153247288                               | SLC44A5                                |
| RASEGRFY                                                                   | 2      | 22:50297991                           | ALG12                                 | GQRCAITL, TRGQRCAITL,<br>GQRCAITLWF                                                                                               | 2           | 1:43212981                                | FBXW7                                  |
| TTRGRMCSR                                                                  | 2      | 1:225211543                           | DNAH14                                |                                                                                                                                   |             |                                           | LEPRE1                                 |
| ILSEHSRTTLF, FLLERQQM,<br>SRTTLFLL                                         | 2      | 12:58157486                           | CYP27B1                               |                                                                                                                                   |             |                                           |                                        |
| WGDAWQSLNCK,<br>AWQSLNCKWLW,<br>WQSLNCKWLW, AWQSLNCKW,<br>VWGDAWQSL        | 2      | 3:168833257                           | MECOM                                 |                                                                                                                                   |             |                                           |                                        |
| KEATSNQDL, KEATSNQDL                                                       | 2      | 3:52550119                            | PCNT1                                 |                                                                                                                                   |             |                                           |                                        |
| QRWTPAPTAM                                                                 | 2      | 21:47754665                           | STAB1                                 |                                                                                                                                   |             |                                           |                                        |
| HPAEQCGM, HPAEQCGMF                                                        | 2      | 12:53207602                           | KRT4                                  |                                                                                                                                   |             |                                           |                                        |
| HWLWVWVWGL,<br>RHWLWVWVWGL,<br>WWWVWVWVWGL                                 | 2      |                                       |                                       |                                                                                                                                   |             |                                           |                                        |



|                                                                                   |   |                            |         |                                                                                                                                 |   |                          |          |
|-----------------------------------------------------------------------------------|---|----------------------------|---------|---------------------------------------------------------------------------------------------------------------------------------|---|--------------------------|----------|
| VPREKRAQW, VPREKRAQWV, QWVSVATL                                                   | 2 | 9:137677855--9:137688741   | COL5A1  | VIDKMNKL                                                                                                                        | 2 | 15:62233987              | VPS13C   |
| LLHSWISL, CLLHSWISL                                                               | 2 | 1:35370639--1:35370731     | DLGAP3  | KIQNEGIG, IQNEGIG                                                                                                               | 2 | 7:87479241               | SLC25A40 |
| KTSNHLIF                                                                          | 2 | 10:25861759                | GPR158  | RRLGHNWSI, LRLGHNWSI                                                                                                            | 2 | 1:17266586               | CROCC    |
| GVFEYHNWVY, WYDDEEATDLL                                                           | 2 | 17:27977745                | SSH2    | LLMQEITAM                                                                                                                       | 2 | 6:152644655              | SYNE1    |
| YADAGILY                                                                          | 2 | 1:197073231                | ASPM    | TMCECVPV                                                                                                                        | 2 | 20:57767560              | ZNF831   |
| RLVSTLNFA                                                                         | 2 | 10:94243045                | IDE     | ILNGISAL, YILNGISALR, YILNGISAL, IRYILNGI, KQIRYILNGI                                                                           | 2 | 7:22767227               | IL6      |
| YQNEEEEAAY                                                                        | 2 | 4:27019558                 | STIM2   | IDNHLHV                                                                                                                         | 2 | 12:78591108              | NAV3     |
| STPAGFHPV                                                                         | 2 | 12:123351891               | VPS37B  | RAVARMGQGM, RAVARMGQGM                                                                                                          | 2 | 17:79803764              | P4HB     |
| KTDKVPPFK                                                                         | 2 | 6:151673370                | AKAP12  | LRREKSNL                                                                                                                        | 2 | 1:17266586               | CROCC    |
| IRAKTASI                                                                          | 2 | 14:27066542                | NOVA1   | AASSRAQVLAL                                                                                                                     | 2 | 6:5260936                | LYRM4    |
| FFRFRGRL, VRRFRFRGRL                                                              | 2 | 19:54974318                | LENG9   | SLKSHLLKY                                                                                                                       | 2 | 2:179529600--2:179528765 | TTN      |
| FATWSALV, FFFATWSALV, FFFATWSAL, FFFATWSALVRL, FFFATWSAL, FFFATWSALV, FATWSALVRLF | 2 | 14:55818554                | FBXO34  | LPYPFHVL, YPFHVLAL, ISACPRLL, LPYPFHVLAL, ISACPRLLPY                                                                            | 2 | 17:40939870--17:40937417 | WNK4     |
| VRHHPWCWSP                                                                        | 2 | 5:14487781                 | TRIO    | FSINSDIWSY                                                                                                                      | 2 | 9:94486762               | ROR2     |
| HVVDIHTSPA                                                                        | 2 | 2:74590132                 | DCTN1   | FVVCCTGWL                                                                                                                       | 2 | 3:32554549               | SUSD5    |
| ARLARTAI                                                                          | 2 | 2:43452623                 | ZFP36L2 | MAISLTAL, MMTMAISLTAL, FTCMNTMAISL, MMTMAISLTA, MTMAISLTA, MTMAISLTAL, CMMTMAISLTA, FTCMNTMAI, MMTMAISL, CMMTMAISL, MAISLTALCAA | 2 | 20:31384651              | DNMT3B   |
| VTYHHHL                                                                           | 2 | 19:33202775                | NUDT19  | VASDVTKQL                                                                                                                       | 2 | 2:179454575              | TTN      |
| ATEHSSLH                                                                          | 2 | 17:72350412                | KIF19   | HLALTKGKRA, GRIHLALT                                                                                                            | 2 | 19:6737481               | GPR108   |
| KQLKPSEKYL                                                                        | 2 | 5:112175594--5:112175596   | APC     | YAHPSAF, KYAHPSSAF, YAHPSAFAPK                                                                                                  | 2 | 5:173317785              | CPEB4    |
| FQISTYQA, LLAVVIQFQI, STYQAQLRI, LAVVIQFQI, STYQAQLRISL, CLLAVVIQFQI, FQISTYQAQL  | 2 | 5:57753012                 | PLK2    | SPLLEWQWVM                                                                                                                      | 2 | 2:230661315              | TRIP12   |
| KITTANVVY                                                                         | 2 | 14:30100143                | PRKD1   | VMPFDTSTL, LVMPFDTSTL                                                                                                           | 2 | 6:51890015--6:51889974   | PKHD1    |
| ALMRSHWPSA                                                                        | 2 | 11:64457919                | NRXN2   | AQCPSPVL                                                                                                                        | 2 | 8:145625525              | CP5F1    |
| YQAQLRISL                                                                         | 2 | 5:57753012                 | PLK2    | SEVSRISKVL                                                                                                                      | 2 | 12:106634007             | CKAP4    |
| FATANRGNL                                                                         | 2 | 1:246670481                | SMYD3   | AADVQLTH                                                                                                                        | 2 | 1:66829220               | PDE4B    |
| LDFDVTDNQI, NQIYWTDI                                                              | 2 | 12:12317235                | LRP6    | AREASLLL, REASLLPSW, REASLLPSWV, EPAAREASL, REASLLLP, REASLLPS                                                                  | 2 | 16:2070164               | NPW      |
| VRGSSRGPVL                                                                        | 2 | 1:161696782                | FCRLB   | FQDLQNDAPV, LQNDAPVPY                                                                                                           | 2 | 19:48879376              | SYNGR4   |
| MLDMAECEGIV                                                                       | 2 | 1:29641954                 | PTPRU   | MYQVQSPM, MYQVQSPML                                                                                                             | 2 | 1:147092566              | BCL9     |
| MVRWAAASKL, MVRWAAASK                                                             | 2 | 19:52715982                | PPP2R1A | YKFSNTPKNVL                                                                                                                     | 2 | 19:12089902              | ZNF763   |
| FLNPRKATQSF                                                                       | 2 | 6:80383444                 | SH3BGR2 | APSTEWWTMV                                                                                                                      | 2 | 6:116836954              | FAM26E   |
| MEHRGPPQNI                                                                        | 2 | X:112065639                | AMOT    | LPAPHCQW                                                                                                                        | 2 | 1:204438071              | PIK3C2B  |
| YMQPPRHYL, MQPPRHYL, YMQPPRHY, LYMQPPRHYL, HYLCSM                                 | 2 | 11:6590002                 | DNHD1   | FPGSEAREAH                                                                                                                      | 2 | 19:1065018               | ABCA7    |
| HSHKRNCLQK                                                                        | 2 | 15:51860704                | DMXL2   | KIMCQLLFRQF, CQLLFRQF, IMCQLLFRQF                                                                                               | 2 | X:41555920               | GPR34    |
| MLHSCRIQ, EQMLHSCRI                                                               | 2 | X:56591874                 | UBQLN2  |                                                                                                                                 |   |                          |          |
| ALSPEPPAYSL                                                                       | 2 | X:3631167                  | PRKX    |                                                                                                                                 |   |                          |          |
| RQNRFASSK                                                                         | 2 | 8:109796543                | TMEM74  |                                                                                                                                 |   |                          |          |
| VEGQIHKLCL                                                                        | 2 | 13:31232879                | USPL1   |                                                                                                                                 |   |                          |          |
| LMVWVWHQV, MVWVWHQV, FSYLMVWVWV, YLMVWVWHQV, AVFSYLMVWVWV                         | 2 | 9:19528054                 | SLC24A2 | HMPRTALCY, ARPWFPRHM, RHMPRTPAL                                                                                                 | 2 | 19:50926264--19:50926165 | SPIB     |
| LLPSPAPHVL                                                                        | 2 | 10:100186986--10:100186987 | HPS1    | STPPGPGPAV                                                                                                                      | 2 | 20:21493012              | NKX2-2   |
| APGERRRIGF, APGERRRIGFL                                                           | 2 | 10:17659131                | PTPLA   | WSPHTSAQSPV, HSAQSPVPL, AQSPVPLRHF                                                                                              | 2 | 7:128852004              | SMO      |
| ARPWSSAPTRM                                                                       | 2 | 19:5231449                 | PTPRS   | LEDKRKNPTLW                                                                                                                     | 2 | 8:28989877               | KIF13B   |
| MMGQNGNLYFA, MMGQNGNLYF                                                           | 2 | X:153136382                | LICAM   | INDKPYST, LEIKPYSTKMK                                                                                                           | 2 | 16:15131990              | NTAN1    |
| HPSRSTWTV                                                                         | 2 | 19:17838753--19:17838385   | MAP1S   | ATCGCPSSRR, ATCGCPSSR                                                                                                           | 2 | 17:70119913--17:70119870 | SOX9     |
| FDKFLQDV, FDKFLQDVSSV, FSHKDFDKL                                                  | 2 | 2:32475708                 | NLRC4   | FANFDQFIQL                                                                                                                      | 2 | 3:164737505              | SI       |
| TRPSRAREAL                                                                        | 2 | 9:98211549                 | PTCH1   | APAFHTGGPLA, APAFHTGGPL                                                                                                         | 2 | 22:28196403              | MN1      |
| EWKVKFPFL                                                                         | 2 | 15:45003781                | B2M     | FSLQREELRAV                                                                                                                     | 2 | 19:55598724              | EPS8L1   |
| LLGDPFHPL, GLLGDPFHPL                                                             | 2 | 19:10116508                | COL5A3  | KLALCETPAPL                                                                                                                     | 2 | 21:35183447              | ITSN1    |
| HLLLHTEV, VNHHTLLL                                                                | 2 | 7:99145140--7:99145142     | FAM200A | FLTDREVQL, LTDREVQL                                                                                                             | 2 | 2:11362292               | ROCK2    |
| YGHSTVHCM                                                                         | 2 | 4:153249384                | FBXW7   | RVVGEVFEVPR, VRSRVVGEVPR                                                                                                        | 2 | 20:49197838              | PTPN1    |
| TRAGTRGSLV, TRAGTRGSL                                                             | 2 | 16:2059622                 | ZNF598  | RAAAGVSV, FAATRAAAGV                                                                                                            | 2 | 20:31384651              | DNMT3B   |
| TASPHSSSF, CTASPHSSSF, CTASPHSSSFL, FLPVPTGRSL, ASPHSSSFLPV, HSSSFLPV, TASPHSSSFL | 2 | 17:79803764                | P4HB    | LVRQQLRL                                                                                                                        | 2 | 2:43452491--2:43452464   | ZFP36L2  |
| SRNYNRRYQI, NYNRRYQISI, YQISICPL, SRNYNRRY, NRRYQISICPL, NYNRRYQI, RRYQISICPL     | 2 | 10:121341501--10:121341690 | TIAL1   | SRWWSAPSRWL                                                                                                                     | 2 | 22:50900047--22:50899955 | SBF1     |
| YLVDHKVHF                                                                         | 2 | 2:112922646                | FBLN7   | QRLLYVYI, YIETNVF, LYLDKVFQRL, LYLDKVFQRL                                                                                       | 2 | 18:12699829              | CEP76    |
| CDLQSSLY                                                                          | 2 | 6:32811743                 | PSMB8   | GRRLGCRV, GRRLGCRVQAL, GREARGRL, REARGRRL                                                                                       | 2 | 9:140100317              | NDOR1    |
| VEEASVPA, LEVEEASVPA, LEVEEASV, EASVPA, VEEASVPA, LEVEEASVPA, EASVPAEPA           | 2 | 2:239039057                | ESPNL   | FQILFTMTLI, FRLFIQNLFF, FIQNLFFQI, RLFIQNLFFQI, FQILFTMTL, ILFTMTLI                                                             | 2 | 3:98506942               | ST3GAL6  |
| SVPVSPV, DHSVPVSPV, HSPVSPV                                                       | 2 | 19:17838385--19:17838753   | MAP1S   | WRTAPLLASL                                                                                                                      | 2 | 1:27100176--1:27100350   | ARID1A   |
| GSVEVIQTL                                                                         | 2 | 19:51217155                | SHANK1  | LYLPRKVLQM, LYLPRKVL                                                                                                            | 2 | 5:112175756              | APC      |
| QAAVDHTTEL, AAVDHTTEL                                                             | 2 | 9:95480987                 | BICD2   | FFHAMHVV, MVFFHAMHVV, MVFFHAMHVV                                                                                                | 2 | 4:4285458                | LYAR     |
| IQIGLIGI, WHIQIGILI                                                               | 2 | 12:66622063                | IRAK3   | YPMSSSGL                                                                                                                        | 2 | 19:39663913              | PAK4     |
| EESLPGAM                                                                          | 2 | 5:137803132                | EGR1    | YVSATTGAI                                                                                                                       | 2 | 5:174938494              | SPXN1    |
| VYEHLEKAAM, YEHLEKAAM, YEHLEKAAMH                                                 | 2 | 12:101705568               | UTP20   | GPAGRIGGNF, GPRLGAPAGRI                                                                                                         | 2 | 18:3452223               | TGIF1    |
| FVSDAVATY, FVSDAVATYY, FVSDAVATYYL, TYFVSDAVATY                                   | 2 | 12:133249847               | POLE    | AWVPAPAGWDL, AWVPAPAGW                                                                                                          | 2 | 17:39780697              | KRT17    |
| FALRPSTV, FALRPSTVPF, STVPLTRAV                                                   | 2 | 15:75942664--15:75942736   | SNX33   | FILGRNRTDVM                                                                                                                     | 2 | 19:52888438              | ZNF880   |
| DRSPQAPLRL                                                                        | 2 | X:129190011                | BCORL1  | GTPPWWPFR                                                                                                                       | 2 | 10:100186987             | HPS1     |
|                                                                                   |   |                            |         | MASGPASSW                                                                                                                       | 2 | 3:52550119--3:52551362   | STAB1    |
|                                                                                   |   |                            |         | GETGRPTLNQM                                                                                                                     | 2 | 17:48619249              | EPN3     |
|                                                                                   |   |                            |         | MQHVRKVDTV, MQHVVRKV                                                                                                            | 2 | 3:9426224                | THUMPD3  |
|                                                                                   |   |                            |         | DRSPQAPL                                                                                                                        | 2 | X:129190011              | BCORL1   |
|                                                                                   |   |                            |         | ASRVWPSTTTL, SRVWPSTTTL                                                                                                         | 2 | 6:13206135               | PHACTR1  |
|                                                                                   |   |                            |         | REAFLEQMMGL, LEQMMGLEAV                                                                                                         | 2 | 9:133948049              | LAMC3    |
|                                                                                   |   |                            |         | AEFRCPGSL, AESPGAEF                                                                                                             | 2 | 17:7462459               | TNFSF13  |

|                          |   |                        |                |
|--------------------------|---|------------------------|----------------|
| MRCWSWSSSL               | 2 | 19:16314384            | AP1M1          |
| NMQTIWVTGRK, VEERRNMQTL  | 2 | 3:121209199            | POLQ           |
| QTIWVTGRK, RRRNMQTIWV,   | 2 |                        |                |
| QTIWVTGRK                | 2 |                        |                |
| LSYHKLAWAR, KIGLSYHK,    | 2 | 6:90387403             | MDN1           |
| HLAKIGLSYHK              | 2 |                        |                |
| TELGFTLLKL, TELGFTLLKLL, | 2 | 8:67752239             | SGK3, C8orf44- |
| TELGFTLL                 | 2 |                        | SGK3           |
| NFIDSKEVYR, KVVQNFIDSK,  | 2 | 10:50684305            | ERCC6          |
| FIDSKEVYR                | 2 |                        |                |
| FWPQRCAQV, FWPQRCAQVL    | 2 | 6:46656871             | TDRD6          |
| RRWRCSQTTSL              | 2 | 5:131042147            | FNIP1          |
| KLYCLIKI, IQKLYCLIKI     | 2 | 10:128908585           | DOCK1          |
| ALQDLAPPAPL, ALQDLAPPA   | 2 | 18:72998443            | TSHZ1          |
| WPARRGPL                 | 2 | 3:114058003            | ZBTB20         |
| RRTSKWMEML,              | 2 |                        |                |
| MRRTSKWMEML,             | 2 | 17:5036224             | USP6           |
| RRTSKWMEM, MRRTSKWM,     | 2 |                        |                |
| MRRTSKWMEM               | 2 |                        |                |
| GRRVCLFL                 | 2 | 3:65346916             | MAG11          |
| SPFRSVGVAS, MENISPFPSV   | 2 | 17:7577065--17:7576881 | TP53           |
| LYQESLPTLF, YQESLPTL,    | 2 |                        |                |
| LYQESLPTL                | 2 | 6:10557410             | GCNT2          |
| MQDPLLSL                 | 2 | 3:168833257            | MCOM           |
| NRKIINQL, NRKIINQILL,    | 2 | 16:46836877            | C16orf87       |
| NRKIINQLI                | 2 |                        |                |
| KSSNFRRYK, SSNFRRYK,     | 2 | 21:38302646            | H LCS          |
| LLKSSNFRRYK              | 2 |                        |                |
| KYLMKPLI, TWPLKYL        | 2 | 12:52379121            | ACVR1B         |
| FTLPFNMV, FTLPFNMV       | 2 | 18:43316498            | SLC14A1        |
| MEQGHLMQ                 | 2 | 8:125109516            | FER1L6         |
| HLVGIALPEVM              | 2 | 1:46120890             | GNBP1L1        |
| LEQLSQGA                 | 2 | 19:17393530            | ANKLE1         |
| FTAQYRQLF, AQYYRQLF,     | 2 | 17:29120666            | CRLF3          |
| FTAQYRQL                 | 2 |                        |                |
| VAPQPQLL                 | 2 | 2:43452464--2:43452439 | ZFP36L2        |
| KENVENRAEM, AEMALLDSL,   | 2 |                        |                |
| VENRAEMAL, AEMALLDS,     | 2 | 3:48612871             | COL7A1         |
| AEMALLDSL, VENRAEMALL,   | 2 |                        |                |
| AEMALLDSL                | 2 |                        |                |
| VRAAWAASAV, QQVTGIVAV    | 2 | 17:73501069            | CASKIN2        |
| KNISLVIGMFI, ISLVIGMFI,  | 2 | 5:5486894              | KIAA0947       |
| VKNISLVI                 | 2 |                        |                |
| FGAGETGRPTL              | 2 | 17:48619249            | EPN3           |
| MFLKKTHLQL               | 2 | 16:15131990            | NTAN1          |

|                          |   |                          |          |
|--------------------------|---|--------------------------|----------|
| RMYGWNFRV, KRMYGWNFRV    | 2 | 14:56137474              | KTN1     |
| APRSTSRPT, RPTGRPAT,     | 2 |                          |          |
| RPTGRPATVA               | 2 | 16:2059622               | ZNF598   |
| AEIWFGLSS, AEIWFGLSSAS,  | 2 |                          |          |
| AEIWFGLSSA, AEIWFGLS     | 2 | 9:139945517              | ENTPD2   |
| SQEMFSQALL               | 2 | 15:91304139              | BLM      |
| RIYITNYYY, ITNYYYGNTLV,  | 2 |                          |          |
| RIYITNYYY, YITNYYYGNTL   | 2 | 1:161954657              | OLFML2B  |
| LRLRRMHV, LRRMHVCGSSL    | 2 | 16:1273490               | TPSG1    |
| STWHSVLM, RSTWHSVLM,     | 2 |                          |          |
| RSTWHSV                  | 2 | 16:50745399              | NOD2     |
| SLKNLSWK, QSLKNLSWK,     | 2 |                          |          |
| QSLKNLSWK,               | 2 | 7:26245989--7:26245999   | CBX3     |
| RVKKLRKQSLK, SLKNLSWK    | 2 |                          |          |
| VFKFCAPRLW, KFCAPRLW     | 2 | 1:201983066              | ELF3     |
| LENRDLPSRV, WMSQVLDL     | 2 |                          |          |
| RVLRGSRAAM,              | 2 | 3:48612871               | COL7A1   |
| CLWMSQVLDL               | 2 |                          |          |
| KALITRRSSL, LRSPSPKAL    | 2 | 11:618971--11:618999     | CDHR5    |
| HRLSLVDPDL               | 2 | 15:94841631              | MCTP2    |
| MRATGPPPPHY              | 2 | 19:39330958              | HNRNPL   |
| FLSPWSPAL, WPSPAIPL,     | 2 |                          |          |
| WPSPAIPL, SPWSPAIPL,     | 2 | 6:33263965               | RGL2     |
| FLSPWSPA                 | 2 |                          |          |
| MTLPAPTACSR              | 2 | 22:20130522              | ZDHHC8   |
| LVIDTMTVE                | 2 | 13:46288409              | SPERT    |
| EMEDQKHSY, LLEMEDQKHSY,  | 2 |                          |          |
| MEDQKHSY                 | 2 | 1:209948748              | TRAF3IP3 |
| IYWTGRKL, IYWTGRKIDPV    | 2 | 4:123283194              | KIAA1109 |
| SSPPPLLL                 | 2 | 8:144886852              | SCRIB    |
| QPLLPAHPL, QPLQPPTLQPL,  | 2 |                          |          |
| QPPTLQPL, LPAHPLTV,      | 2 | 17:70120194--17:70119909 | SOX9     |
| LPAHPLTV                 | 2 |                          |          |
| CRKSDASSL, CRKSDASSLM    | 2 | 11:9172291               | DENND5A  |
| YGDIIQQDF, YGDIIQQDFL    | 2 | 3:160804109              | B3GALNT1 |
| RTMEDAAHM                | 2 | 3:52551362--3:52550119   | STAB1    |
| TMTVWMAV, GTMTVWMAV      | 2 | 12:57595335              | LRP1     |
| ALMVPALL, TAGAPPAL,      | 2 |                          |          |
| TATAGAPPAL, ALMVPALLA,   | 2 | 7:100285170              | GIGYF1   |
| TATAGAPPALM              | 2 |                          |          |
| WVADSNVFTK               | 2 | 1:220311332              | IARS2    |
| RTSWPSALAY, RTSWPSALAYL, | 2 |                          |          |
| RTSWPSAL, RTSWPSALAY,    | 2 | 5:140176838              | PCDHA2   |
| TSWPSALAYL               | 2 |                          |          |

|                        |   |                            |         |
|------------------------|---|----------------------------|---------|
| QMLAVSATYPK            | 2 | 1:112303389                | DDX20   |
| VASISAVSLE             | 2 | 1:22191454                 | HSPG2   |
| QEKLDQYSVI             | 2 | 6:152679555                | SYNE1   |
| RVPSVTLV               | 2 | 18:44400988                | PIAS2   |
| LSCVVFINK, LSCVVFINKK, | 2 |                            |         |
| PLSCVVFINK, CVVVFINKK  | 2 | 9:95610657                 | ZNF484  |
| CFPGNQHL, FPGNQHL      | 2 | 11:124845049               | CCDC15  |
| HQFVWWDISK, CRILWGHQF  | 2 | 9:134073007                | NUP214  |
| TRCSWARPL              | 2 | 4:860923--4:861066         | GAK     |
| LPPSPSTCSM, LPLPSPST,  | 2 |                            |         |
| SPSTSCSM               | 2 | 16:2059622                 | ZNF598  |
| MERCTHCT               | 2 | 16:2059622                 | ZNF598  |
| EASKKAMGPL             | 2 | 7:100285170                | GIGYF1  |
| IENSSIQELF, IENSSIQEL  | 2 | 2:210558484                | MAP2    |
| FSKRCDSPPLV, FSKRCDSP  | 2 | 11:4674564                 | OR51E1  |
| CTWVRGPTAPR            | 2 | X:1407724                  | CSF2RA  |
| SLHFLCWSL, FLPGSTPSLHF | 2 | 16:84213651                | TAF1C   |
| KLDFETMSLY             | 2 | 5:140626087                | PCDHB15 |
| KLLGQLYK               | 2 | 11:33054956                | DEPDC7  |
| RSWMWNQLF, SWMWNQLF,   | 2 |                            |         |
| NQLFLLEEY, RSWMWNQLFL, | 2 | 5:31267760                 | CDH6    |
| RSWMWNQL, WMWNQLFL,    | 2 |                            |         |
| RSWMWNQLFL             | 2 |                            |         |
| YHHPQAPV               | 2 | 14:105173873--14:105174013 | INF2    |
| AEWPLALAE              | 2 | 16:2059622                 | ZNF598  |
| KENLIGTLL, KENLIGTL,   | 2 |                            |         |
| KENLIGTLAI             | 2 | 1:24766677                 | NIPAL3  |
| SAPHHVLPAV             | 2 | 10:100186986               | HPS1    |
| MVPWGMEAL              | 2 | 14:104642555--14:104642401 | KIF26A  |
| WMVPWGMEAL             | 2 | 14:104642401               | KIF26A  |
| IRPQSPPEL              | 2 | 16:677579                  | RAB40C  |
| DLEFHGMIFY             | 2 | 6:168265256                | MLLT4   |
| LPLRRRPGPW             | 2 | 10:124895627               | HM3     |
| HALQILLV, RVLRATHAL    | 2 | 10:112838962--10:112837855 | ADRA2A  |
| LLSFVPGGYPA            | 2 | 15:45003781                | B2M     |
| HRPLCQRF, RFPTLTVSRWM  | 2 | 16:14346300                | MKL2    |
| GQWMAHMAL              | 2 | 1:27100176--1:27100350     | ARID1A  |
| ARLFAILLL              | 2 | 20:43976991                | SDC4    |
| ITFLFDSL               | 2 | 8:124799557                | FAM91A1 |
| SLPPPPPSQL             | 2 | 7:101839973                | CUX1    |
| STFEGAKML              | 2 | 6:87967866                 | ZNF292  |
| LLSLPLDSSPL            | 2 | 3:77657038                 | ROBO2   |
| KMDLDGMLTV,            | 2 |                            |         |
| GMLTVIGQLV             | 2 | 17:76046980                | TNRC6C  |
| LLLWVENL, MLLLWVENL    | 2 | 14:103593950               | TNFAIP2 |

|                          |   |                            |          |
|--------------------------|---|----------------------------|----------|
| NPHIQRL, SEYLLGNPHI,     | 2 |                            |          |
| NPHIQRLNNT, YLLGNPHIQRL  | 2 | 4:8607830                  | CPZ      |
| HPQWAPHSAGL, MPPLHPQW,   | 2 |                            |          |
| HPQWAPHSA                | 2 | 17:48433967                | XYLT2    |
| RQPGLSA                  | 2 | 1:204159787                | KISS1    |
| HPSPFSLG                 | 2 | 2:204305618                | RAPH1    |
| KLSPCLATW                | 2 | 17:61560426--17:61560412   | ACE      |
| FYISSTVCF, FYISSTVCF     | 2 | 3:182603763--3:182602674   | ATP11B   |
| YRCEGDTPTI               | 2 | 7:81346553                 | HGF      |
| NISSRVL, SRTRVLMV        | 2 | 5:140801569                | PCDHGA11 |
| HTSTVCCMHLH              | 2 | 4:153249385                | FBXW7    |
| VQDRVPHL                 | 2 | 2:43452464--2:43452439     | ZFP36L2  |
| AESPGAAL                 | 2 | 17:7462459                 | TNFSF13  |
| FRITRGPRAA, RRSVSCF      | 2 | 7:42005573                 | GLI3     |
| WATSGAATPV, WATSGAATPVI  | 2 | 9:16436658                 | BNC2     |
| TLLPSTSSL                | 2 | 9:5921755                  | KIAA2026 |
| STMAPGSSAAV, TMAPGSSAAV, | 2 |                            |          |
| LASPSLSTSTM              | 2 | 11:618999--11:618971       | CDHR5    |
| SRHGTQPL                 | 2 | 5:141046035                | ARAP3    |
| NSCQTTTY, FQNSCQTTTY     | 2 | 1:82408841                 | LPNH2    |
| STFNVMQNF                | 2 | 8:12957475                 | DLC1     |
| LATPPPLL                 | 2 | 2:60688969                 | BCL11A   |
| SAQSLTK                  | 2 | 3:114058003                | ZBTB20   |
| YVAEAGPPPA               | 2 | 14:74967607                | LTBP2    |
| SLMEQPHLK, SLMEQPHL      | 2 | 13:53049034                | CKAP2    |
| SEQADKVS                 | 2 | 8:70667685                 | SLC05A1  |
| FTNKENL                  | 2 | 9:86617158                 | RM1      |
| HYPCPPAL                 | 2 | 11:64507638                | RASGRP2  |
| SEMAVHRTHS, SEMAVHRRT,   | 2 |                            |          |
| SEMAVHRR, SEMAVHRRH      | 2 | 16:30566747                | ZNF764   |
| ARMAQAYVL, RMAQAYVL      | 2 | 18:21453109--18:21451595   | LAMA3    |
| ALNKHSLE                 | 2 | 16:12136879                | SNX29    |
| KMNFVTGTL, KMNFVTGTLAI   | 2 | 6:160485488                | IGF2R    |
| REIDVLEW, LEWELNILIF,    | 2 |                            |          |
| WEIDVLEWEL, LEWELNIL,    | 2 | 1:233497916                | KIAA1804 |
| LEWELNIL                 | 2 |                            |          |
| ELSRCEPEY, LSRCEPEY      | 2 | 11:118770651               | BCL9L    |
| QSPHHAGHLR               | 2 | 16:68026995                | DPEP2    |
| KIFWPHDDPA               | 2 | 14:104642401--14:104642560 | KIF26A   |
| LARMGGAASF               | 2 | 7:91732038                 | AKAP9    |
| CEGFKLHF                 | 2 | 7:115874657                | TES      |
| FEMVTAGDMRV, FEFEMVTA    | 2 | 1:237729972                | RYR2     |
| NPSSWLVS, FVVQNPSSWL     | 2 | 4:154513664                | KIAA0922 |







|                                                        |   |                            |                   |
|--------------------------------------------------------|---|----------------------------|-------------------|
| VRALAASGTWF, ALAASGTWFL, ALAASGTWFL, ALQSPAV           | 2 | 1:35370639--1:35370731     | DLGAP3            |
| WSWCGTSQTY                                             | 2 | X:129190011                | BCORL1            |
| AYEIHSDSF                                              | 2 | 2:179611639                | TTN               |
| HRASMQPIQI, HRASMQPI                                   | 2 | 11:71715795                | NUMA1             |
| FVIPPQTL                                               | 2 | 16:4944500                 | PPL               |
| KIIGHFLFW                                              | 2 | 7:106513165                | PIK3CG            |
| ATASPSPL                                               | 2 | 9:98209617--9:98209593     | PTCH1             |
| LLKIPRTLK, SLLKIPRTLK                                  | 2 | 6:89793677                 | PNRC1             |
| SAVMSANAAY, AVMSANAAY                                  | 2 | 8:22054260--8:22054259     | BMP1              |
| NEQKARGAAL                                             | 2 | 7:150698398                | NOS3              |
| KMIKWTL                                                | 2 | 14:92472698                | TRIP11            |
| FEIEMNEI, FEIEMNEITNV, IEMNEITNV, IEMNEITNVI           | 2 | 18:28914134                | DSG1              |
| RPQLRRWL                                               | 2 | 1:85040070                 | CTBS              |
| KSNPGQLQY                                              | 2 | 7:107823349                | NRCAM             |
| KQVGFISL                                               | 2 | 2:152522864                | NEB               |
| CSHFPTLL                                               | 2 | 16:68835781                | CDH1              |
| VTETNNSPLM                                             | 2 | 19:50547943                | ZNF473            |
| ARPCLPQAM, ASARPCLPQAM, SARPCLPQAM                     | 2 | 1:53974841                 | GLIS1             |
| RRNPTQGGLL                                             | 2 | 20:3870079                 | PANK2             |
| YIIQTLRSVEF                                            | 2 | 6:118596709                | SLC35F1           |
| KRAQWVSVATL, KRAQWVSV                                  | 2 | 9:137688741--9:137693829   | COL5A1            |
| ASDGSDTSM, TASDGSDTSM                                  | 2 | X:75649461                 | MAGEE1            |
| LPWMPWGMEA, VPWGMEA                                    | 2 | 14:104642555--14:104642560 | KIF26A            |
| TAYWALAGL, TAYWALAGL, HPLVATQAL, HPLVATQALL            | 2 | 1:116569517                | SLC22A15          |
| LRHEASRPLR, LRHEASRPL                                  | 2 | 1:228559450                | OBSCN             |
| WPLASPPA                                               | 2 | 16:632283                  | PIGQ              |
| VIQDIFFFV, GVIQDIFFFV, IQDIFFFV                        | 2 | 8:10583646                 | SOX7              |
| LLMRPAGAL                                              | 2 | 5:72199545                 | TNPO1             |
| FSDKMGTL                                               | 2 | 9:114393784                | DNAJC25, DNAJC25- |
| SQIEEAV                                                | 2 | 1:154313476                | GNG10             |
| LTSTPNVHMV                                             | 2 | 8:99115125                 | ATP8B2            |
| YTFASEPNNV, YTFASEPNNV, FASEPNNV, FASEPNNVF, FASEPNNVF | 2 | 3:12645699                 | HRSP12            |
| HRLSQLKPPVL                                            | 2 | 2:238249185                | RAF1              |
| KRERVDSLK                                              | 2 | 22:50962782                | COL6A3            |
|                                                        | 2 | 5:112175649--5:112175552   | SCO2, APC         |

|                                                                                            |   |                          |        |
|--------------------------------------------------------------------------------------------|---|--------------------------|--------|
| VTHPPWAAAM, WAAMASACSL                                                                     | 2 | 16:67325658              | KCTD19 |
| WSSTCCGGSM                                                                                 | 2 | 16:2059622               | ZNF598 |
| TMAKTSAV, VTMAKTSAV                                                                        | 2 | 19:31768228              | TSHZ3  |
| VMMLEVCRSI, LEVCSRIQEF, TVPEVMMLEV, MMLEVCRSI                                              | 2 | 16:71602123              | TAT    |
| FTLRWSYNEL, LRWSYNEL, LRWSYNELGGL, LRWSYNELGGL                                             | 2 | 8:73848578               | KCNB2  |
| IPGAHPASSAW                                                                                | 2 | 1:154942910              | SHC1   |
| AEVKHLHLLL                                                                                 | 2 | 5:112175572--5:112175553 | APC    |
| YVMAGLGSPIY, ILDEAYVMAGL, YVMAGLGSPIY                                                      | 2 | 17:37881000              | ERBB2  |
| DELFTMMRSFI, LFTMMRSF, GFLSKDELFL                                                          | 2 | 15:45396172              | DUOX2  |
| FYFIPSQL, FYFIPSQLCEI, YFIPSQLCEI                                                          | 2 | 11:59633897              | TCN1   |
| LAPPPSAPL                                                                                  | 2 | 14:75230947              | YLFPM1 |
| CSSVSSSDGSF                                                                                | 2 | 3:78666908               | ROBO1  |
| IVHNLFVLR                                                                                  | 2 | 4:3182271                | HTT    |
| QIQAAATLQAK, FQIQAAATL, YSMESRTHFQI                                                        | 2 | 1:51753908               | TTC39A |
| CRVRHERYFLL, VRHERYFLL                                                                     | 2 | 14:74004517              | ACOT1  |
| ERNRCVML, VMLFRQLHQEL                                                                      | 2 | 12:121746350             | ANAPC5 |
| NYWKRHIEVVM, YWKRHIEVVM, NYWKRHIEV, RHIEVVMREY, KRHIEVVM, KRHIEVVMREY, NYWKRHIEV, YWKRHIEV | 2 | 7:73021716               | MLXIPL |
| RWWRAAGF, ARWWRAAGF                                                                        | 2 | 2:38301663               | CYP1B1 |
| RMPARRESRFW                                                                                | 2 | 18:34205516              | FHOD3  |
| WMWAVEHSLPR, FLWMWAVEHSL                                                                   | 2 | 10:134158106             | LRRC27 |
| KDLAWLYFKIF, LAWLYFKI, KDLAWLYFKI                                                          | 2 | 3:186281890              | TBCCD1 |
| RPAPRPTA                                                                                   | 2 | 16:88599701              | ZFPM1  |
| CRILGVTEI                                                                                  | 2 | 21:45402199              | AGPAT3 |
| KLFDILDHYT                                                                                 | 2 | 4:115544340              | UGT8   |
| RPRTARAAGAA, AARAARARV, AARAARARVA, RPRTARAAG, RPRTARAA, RPRTARAAGA, RPRPTARA, RPRPTARAA   | 2 | 16:88599701              | ZFPM1  |
| RTPMITRL                                                                                   | 2 | 22:18300932              | MICAL3 |

|                                                                  |   |                        |         |
|------------------------------------------------------------------|---|------------------------|---------|
| MSPSLLDYTM, MSPSLLDY, EMPSLLDY                                   | 2 | 9:134183379            | PPAPDC3 |
| EAWWCRCPL                                                        | 2 | 18:60639886            | PHLP1   |
| IQEVTVNQSL, ILTPLNLQI                                            | 2 | 12:52913636            | KRT5    |
| VLFTGILY, SVLFTGILY, VLFTGILYV, ILYVDPVGNV                       | 2 | 1:216138672            | USH2A   |
| ASALPEALV                                                        | 2 | 17:80274142            | CD7     |
| IIDQLFAV                                                         | 2 | 5:13928280             | DNAH5   |
| IEGQVQLQI, IEGQVQLQIAV                                           | 2 | 12:46230605            | ARID2   |
| RLRRLHRRLP, RLRRLHRR                                             | 2 | 15:59981590            | BNIP2   |
| WPCPCSWCTA                                                       | 2 | 16:88599701            | ZFPM1   |
| SLPRSTWHSV                                                       | 2 | 16:50745399            | NOD2    |
| WSSSPTPCPK                                                       | 2 | 8:22054259--8:22054260 | BMP1    |
| KRTWSRPSL                                                        | 2 | 14:59112895            | DACT1   |
| RDKLPLFLLI, KRDKLPLFL, KRDKLPLFLLI                               | 2 | 10:63958149            | RTKN2   |
| YFQVNITADSL, LRIQPAVKYF                                          | 2 | 1:117556033            | CD101   |
| ASACTMPLL                                                        | 2 | 17:48433967            | XYLT2   |
| FSCMRVASY                                                        | 2 | 14:20846338            | TEP1    |
| TRMPGPVPA                                                        | 2 | 17:61781804            | STRADA  |
| SFWPGGYPAY                                                       | 2 | 15:45003781            | B2M     |
| AEHQAINTI, YRKAHAHQAI, AEHQAINTI, AEHQAINTI                      | 2 | 3:121155115            | POLQ    |
| GLAPETLSA                                                        | 2 | 17:46629593            | HOXB3   |
| RRSSPPRRPL, SPPRRPLQTL, RRPLQTL                                  | 2 | 1:36643530--1:36643581 | MAP7D1  |
| LDLEPGGASAW, LEPPGGASAW                                          | 2 | 19:1004710             | GRIN3B  |
| GYCFRMSL, WLRGHETGYCF, YLWLRGHETGY                               | 2 | X:39913253             | BCOR    |
| ETLNPMYV, MYVPCVKEL, NPMYVPCV, MYVPCVKEL, NPMYVPCVKEL, GETLNPMYV | 2 | 19:10659690            | ATG4D   |
| MRLMLAL, STMRLMLAL, MRLMLALL, MSTMRLML, MRLMLALL                 | 2 | 9:140033961            | GRIN1   |
| MQLYMQLLHEI                                                      | 2 | 9:129870607            | ANGPTL2 |
| LLFPSTAHYL, TAHYLGAYV, FPSTAHYL, LFPSTAHYL, STAHYLGAYV           | 2 | 12:8075422             | SLC2A3  |
| FLCATEWLT, FLCATEWLT, FLCATEWL, VMFLCATEWL                       | 2 | 14:54898881            | CNIH    |
| IIFDTSWNPSY                                                      | 2 | X:76814235             | ATRX    |
| CPLICQQA, VPLCPLICQQA, HPVPLCPL, HPVPLCPLI                       | 2 | 1:207139176            | FCAMR   |
| APQLTITSL, APQLTITSL                                             | 2 | 5:140215022            | PCDHA7  |

|                                                                                          |   |                          |         |
|------------------------------------------------------------------------------------------|---|--------------------------|---------|
| GLWPWGAQV                                                                                | 2 | 20:23066469              | CD93    |
| KECQATARKF                                                                               | 2 | 1:76198353               | ACADM   |
| RWISEDLDGF, FLRDWHS, RWISEDLDGFL, WFSIVQTRW, SWFSIVQTRWL, SWFSIVQTRW, FLRDWHS, FSIVQTRWI | 2 | 5:13830840               | DNAH5   |
| FRQNELKTTY                                                                               | 2 | X:84526620               | ZNF711  |
| RTDCLLAV, RTDCLLAV                                                                       | 2 | 5:57753012               | PLK2    |
| FAREDRIRM                                                                                | 2 | 15:54919114              | UNC13C  |
| MQLMAIFKR, MQLMAIFK                                                                      | 2 | 6:76715225               | IMP1    |
| ALRRAACLAH                                                                               | 2 | 11:76751542              | B3GNT6  |
| GELANGLTL                                                                                | 2 | 2:238296564              | COL6A3  |
| ESNKLETICY                                                                               | 2 | 11:82976919              | CCDC90B |
| FLIQPEEC                                                                                 | 2 | 5:112175788--5:112175755 | APC     |
| AEDLLGVAVF                                                                               | 2 | 1:200378558              | ZNF281  |
| WQIYQYNY, KIWIYQY, QKIWIYQY, KIWIYQYNY                                                   | 2 | 7:82579967               | PLO     |
| VALPQPQPSL, LAAVRGVAL, AAVRGVAL                                                          | 2 | 12:111800827             | FAM109A |
| KWCRPWLEQM, KWCRPWLEQML, SFSKWCRPW                                                       | 2 | X:56591874               | UBQLN2  |
| SRKHHHKL                                                                                 | 2 | 2:171705836              | GAD1    |
| AAAPPVRLAR                                                                               | 2 | 2:43452439--2:43452491   | ZFP36L2 |
| RQPPHHLVPL, RQPPHHLVPL, RQPPHHLV, RQPPHHLV, RQPPHHLV                                     | 2 | 16:30736371              | SRCAP   |
| TRTVLQVTL, TRTVLQVTL, RTVLQVTL, RTVLQVTL                                                 | 2 | 6:101094534              | ASCC3   |
| LRQGRGLL, LRQGRGLL, LRQGRGLL, LRQGRGLL                                                   | 2 | 7:99818416--7:99817848   | PVRIG   |
| CRSSLPSPTL                                                                               | 2 | 1:35370639--1:35370731   | DLGAP3  |
| FEVRVCACT, FEVRVCACTG                                                                    | 2 | 17:7577106               | TP53    |
| FFSKPKRIKNL, KRIKNSL                                                                     | 2 | 2:201436992              | SGOL2   |
| MERCCTCTG                                                                                | 2 | 16:2059622               | ZNF598  |
| SEGWHWGAAAPM                                                                             | 2 | 7:120971879              | WNT16   |
| RRANKDATAEL, ATAEIIDEF                                                                   | 2 | 11:116656573             | ZNF259  |
| ILCQKLMQV, WLLQGIFSTTI                                                                   | 2 | 16:87866620              | SLC7A5  |
| LEGMILPRAL                                                                               | 2 | 18:34205516              | FHOD3   |
| WRRRGSGTIM, RRRRGSGTIM, RRGSGTIM                                                         | 2 | 1:35370731--1:35370639   | DLGAP3  |
| SERVMRVQGNV, MRVQGNVYHL                                                                  | 2 | 1:87805290               | LMO4    |
| HRPGTPPPLI, HRPGTPPPLIL                                                                  | 2 | 2:74687410               | WBPI    |
| TRMTVQASL                                                                                | 2 | 2:220494118              | SLC4A3  |



|                                                         |   |                          |           |
|---------------------------------------------------------|---|--------------------------|-----------|
| HQWLALLPL                                               | 2 | 16:28913639              | ATP2A1    |
| FQMHMRWQSF                                              | 2 | 19:20044269              | ZNF93     |
| GVAFPCPR, CPRSAVDI                                      | 2 | 1:150529443--1:150530506 | ADAMTSL4  |
| YSFQVAKDMEF                                             | 2 | 4:55958809               | KDR       |
| ALAEPELI                                                | 2 | 18:72775210              | ZNF407    |
| LSELTMEI                                                | 2 | 1:39759288               | MACF1     |
| LKMMYHIF, LQMIWAFYL,<br>QMIWAFYL                        | 2 | 1:35972480               | KIAA0319L |
| HQFKSPPEIFY, SFPEIFYL                                   | 2 | 17:42818751              | DBF4B     |
| AAPPVRLARV                                              | 2 | 2:43452439--2:43452244   | ZFP36L2   |
| SWFNGTEL                                                | 2 | 7:1097183                | GPR146    |
| LLSSCSSR                                                | 2 | 17:56448298              | RNF43     |
| RLLTRCCSSA                                              | 2 | 6:116783330              | FAM26F    |
| MCGSALAFFYR, SALAFFYR,<br>GSALAFFYR, CGSALAFFYR         | 2 | 7:20371449               | ITGB8     |
| TSQPPQLNLK                                              | 2 | 8:59728228               | TOX       |
| ARTWPGIACRV                                             | 2 | 16:2059622               | ZNF598    |
| KTYPISEGLTM, TYPISSEGLTM,<br>YPISEGLTM                  | 2 | 2:54093345               | PSME4     |
| VVVVCRPENTK                                             | 2 | 11:28119446              | KIF18A    |
| WTSWPTATWWA                                             | 2 | 8:145150876              | CYC1      |
| RSWTSKGWR, RSWTSKGWRRR                                  | 2 | 7:100285170--7:100283942 | GIGYF1    |
| PHSSGLAL                                                | 2 | 22:31485922              | SMTN      |
| YSYRGPQDFNY,<br>YRGPQDFNYFV,<br>SYRGPQDFNYF, YRGPQDFNYF | 2 | 14:72171471              | SIPA1L1   |
| KVPVRAWLPR                                              | 2 | 2:43452439--2:43452491   | ZFP36L2   |
| LPGGKAEAAA, FPFLSGLPG                                   | 2 | 16:30736370              | SRCAP     |
| IAITGGRI, ITGGRIVPR,<br>TTGGRIVPR                       | 2 | 5:10261684               | CCT5      |
| VAVKILLTF, FVAVKILLTF,<br>FVAVKILL                      | 2 | 6:13306704               | TBC1D7    |
| WEPHTVQVTF                                              | 2 | 10:119805617             | RAB11FIP2 |
| RERLYQDTSL                                              | 2 | 13:20638677              | ZMYM2     |
| APSSAWRF                                                | 2 | 8:120220776              | MAL2      |
| TEVPSLTA                                                | 2 | 2:1481231                | IRX5      |
| TPSEGRDLA, TPSEGRDLAL                                   | 2 | 16:54967096              | OLAH      |
| YLMEFGGTFSI                                             | 2 | 10:15107665              | ACVR1     |
| ITHYHEMGLLY,<br>LLYDYLQTLT, HEMGLLYDYL                  | 2 | 2:158622630              | ZNF793    |
| RSHTSMYI, LVRSHTSM                                      | 2 | 19:38028415              | SPIB      |
| KTYRWTAL, YRWTALPW,<br>KTYRWTALPW                       | 2 | 19:50926264--19:50926165 |           |

|                                                                                                                   |   |                                                |                |
|-------------------------------------------------------------------------------------------------------------------|---|------------------------------------------------|----------------|
| SSMNPTSL, RSSMNPTSL                                                                                               | 2 | 7:100855927                                    | PLOD3          |
| LFYAKGTGYL, GQFRVSLFY,<br>SLFYAKGTY                                                                               | 2 | 2:21235259                                     | APOB           |
| QTDSCTFYI                                                                                                         | 2 | 11:3123436                                     | OSBPL5         |
| YAPCCLSL, GLSDSYAPCCL                                                                                             | 2 | 22:50315971                                    | CRELD2         |
| HSLEYSLQIQK, SLEYSLQIQK                                                                                           | 2 | 3:115805269                                    | LSAMP          |
| FQLCLHYRYF, CLHYRYFIPGV,<br>YRYFIPGVAI, FQLCLHYRY,<br>YFIPGVAI, YRYFIPGV,<br>YRYFIPGVAI, FQLCLHYRYF,<br>YRYFIPGVA | 2 | 9:120476537                                    | TLR4           |
| MPTLHTQV, MPTLHTQVQRV                                                                                             | 2 | 16:633353--16:633354--<br>16:633354--16:633353 | PIGQ           |
| LENIKTVI                                                                                                          | 2 | 1:76343855                                     | MSH4           |
| LLLGALGL, LLLGALGLKAL                                                                                             | 2 | 18:43419003                                    | SIGLEC15       |
| FSLVHVHQL, FSLVHVHQL                                                                                              | 2 | 19:58084067                                    | ZNF416         |
| RMVRGTQVY, LPLPNLRM,<br>MVRGTQVYDGK                                                                               | 2 | 12:56478854                                    | ERBB3          |
| IEIVCRVF, IEIVCRVFS                                                                                               | 2 | 14:36217850                                    | RALGAPA1       |
| CQKTLTLHQI                                                                                                        | 2 | 19:37118166                                    | ZNF382         |
| LLPAPSAVL, SWISVPCPNLL,<br>LLPAPSAVL                                                                              | 2 | 16:30736371                                    | SRCAP          |
| STNSDGSV, STNSDGSVTV                                                                                              | 2 | X:8538695                                      | KAL1           |
| HATPQTLQPK                                                                                                        | 2 | 16:50745399                                    | NOD2           |
| YWEALGAPEAL                                                                                                       | 2 | 19:622336                                      | POLRMT         |
| VVVGAVG                                                                                                           | 2 | 12:25398284                                    | KRAS           |
| GRAAARAV                                                                                                          | 2 | 2:43452464--2:43452439                         | ZFP36L2        |
| TWHVAHTL, TWHVAHTF,<br>STWHVAHTF, TWHVAHTFLLM                                                                     | 2 | 11:57185284                                    | SLC43A3        |
| FLWPGTSPHRL                                                                                                       | 2 | X:128926360                                    | SASH3          |
| GEGPDTFSCSW                                                                                                       | 2 | 22:21982892                                    | YDJC           |
| RLTRAHVECL, LTRAHVECL,<br>MLYGNDRFEGY,                                                                            | 2 | 4:1389117--4:1389384                           | CRIPAK         |
| FVMFRKSDRM                                                                                                        | 2 | 1:37307503                                     | GRIK3          |
| LILAVFSPV, YLILAVFSPV,<br>ILAVFSPV                                                                                | 2 | 19:47969003                                    | SLC8A2         |
| EVKHLHLL, EVKHLHLL                                                                                                | 2 | 5:112175552--5:112175572                       | APC            |
| RFPQSLYRGTV                                                                                                       | 2 | 11:619789                                      | CDHR5          |
| WRFCGVLG                                                                                                          | 2 | 8:120220776                                    | MAL2           |
| LMNLTVLVYQF, QFSRLQPSKF,<br>MNLTVLVYQF, YQFSRLQPSKF,<br>MNLTVLVI                                                  | 2 | 5:13830840                                     | DNAH5          |
| LRWLKRDYSYL, IHMDCLRWL,<br>VDLNTNFKKI                                                                             | 2 | 12:133250289<br>7:84727134                     | POLE<br>SEMA3D |

|                                                                  |   |                           |                  |
|------------------------------------------------------------------|---|---------------------------|------------------|
| TRASCLGWSM                                                       | 2 | 19:7592423--19:7592444    | MCOLN1           |
| CENSLPYQVSL                                                      | 2 | 9:33796691                | PRSS3            |
| ATWWCTGAATR                                                      | 2 | 2:60688969                | BCL11A           |
| FTVPSNRSREV                                                      | 2 | 5:112128184--5:112116559  | APC              |
| RWAAASKL                                                         | 2 | 19:52715982               | PPP2R1A          |
| YTVCRFSI                                                         | 2 | 3:62254809                | PTPRG            |
| LEERGSPOYL                                                       | 2 | 6:75875478                | COL12A1          |
| YCINLAALSF                                                       | 2 | 12:65857005               | MSRB3            |
| TVIAGHHCQY, IAGHHCQY,<br>GAHHCQYKLT, Y,<br>VIAGHHCQY, MAMTVIAGAH | 2 | 3:77657038                | ROBO2            |
| ATDKWAFFL, ATDKWAFF<br>CSSWRSSSP, SSWRSSSPR                      | 2 | 1:156912567<br>6:41555186 | ARHGEP11<br>FOX4 |
| WLWWWIWLGL,<br>FRHWLWWWI,<br>WLWWWIWLGL, WIWGLLQW                | 2 | 12:53207602               | KRT4             |
| AECNVHSVCI, AECNVHSVCI,<br>AECNVHSV                              | 2 | 18:7032076                | LAMA1            |
| SLHQITFI                                                         | 2 | 4:122756323               | BBS7             |
| GLELKTINY                                                        | 2 | 6:43305257                | ZNF318           |
| FMLILSIAT, TLFNSVATFML,<br>FMLILSIA                              | 2 | 10:94243045               | IDE              |
| KLAMKIGGV, LAMKIGGV,<br>SVRSFMDLKIK, FMDLKIKL                    | 2 | 5:72199545                | TNPO1            |
| CPTTAPL, LPSQRNHW                                                | 2 | 17:7577065--17:7577036    | TP53             |
| FLKGLALAI, FLLKGLAL                                              | 2 | 9:98209593--9:98209617    | PTCH1            |
| SRSVQQLQTSF                                                      | 2 | 3:137983011               | ARMC8            |
| LRIASQVLI                                                        | 2 | 16:88494506--16:88494491  | ZNF469           |
| RRQKKEPLI, RRQKKEPL,<br>RRQKKEPLI                                | 2 | 5:31322961                | CDH6             |
| SMDASSKM                                                         | 2 | 10:93220255               | HECTD2           |
| LENKLKAAAYM                                                      | 2 | 15:56739117               | MNS1             |
| ALDKPCHQAEV                                                      | 2 | 5:112175552--5:112175553  | APC              |
| TRNPRSL                                                          | 2 | 1:156715104               | HDGF             |
| KDHIFSNLV, FSNLVNIKDF,<br>KDHIFSNLV                              | 2 | 7:83764139                | SEMA3A           |
| LPMNWSPL                                                         | 2 | 15:65678360--15:65678319  | IGDC4            |
| VRPPGPPCL                                                        | 2 | 5:14487781                | TRIO             |
| RETPQNHS                                                         | 2 | 18:19144267               | ESCO1            |
| TPLLNGLDYTV, TPLNGLDY,<br>LPSHTPLL, ISSLPSHTPLL,<br>LPSHTPLLNL   | 2 | 1:180243511               | LHX4             |
| LEGGQAEVQL, AEVQLRRNA                                            | 2 | 16:3304463                | MEFV             |
| RVCLFLKR                                                         | 2 | 3:65346916                | MAGI1            |
| ALACSLLEK                                                        | 2 | 2:36825137                | FEZ2             |

|                                                                                       |   |                          |          |
|---------------------------------------------------------------------------------------|---|--------------------------|----------|
| RLTWGRRR                                                                              | 2 | 7:102715804              | ARMC10   |
| KEICIEKL                                                                              | 2 | 14:92471873              | TRIP11   |
| YGNPIEASLY                                                                            | 2 | 16:20335551              | GP2      |
| REILDGLVEL, REILDGLV                                                                  | 2 | 7:43918139               | URGCP    |
| SROGDVHSDV                                                                            | 2 | 17:12028657              | MAP2K4   |
| RYKDLVLNETL, YKDLVLNETL                                                               | 2 | 10:101455842             | ENTPD7   |
| STDDQIVSYL                                                                            | 2 | 6:24566874               | KIAA0319 |
| HRNAYQTEF                                                                             | 2 | 7:94539496               | PPP19A   |
| VTANSWLPF, TANSWLPF,<br>SSMPHGVV                                                      | 2 | 17:79803764              | P4HB     |
| NRHWHWSSGSL                                                                           | 2 | 2:79349974               | REG1A    |
| RPAPSIWGMML                                                                           | 2 | 8:28210809               | ZNF395   |
| CAWASTTRSSL                                                                           | 2 | 19:16314384              | AP1M1    |
| VLNPLPSI, GMFVLNPL,<br>VLNPLPSIML, FVLNPLPSI                                          | 2 | 22:38895455              | DDX17    |
| RYFLKRQEM, YFLKRQEM,<br>LRRYFLKRQEM                                                   | 2 | 13:95735432              | ABCC4    |
| TVSYLKTQK, MTTVSYLKTQK,<br>VSYLKTQK, GNMVTVSYL,<br>MTTVSYLK, TTVSYLKTQK,<br>NMVTVSYLK | 2 | 3:39159652               | TTC21A   |
| FEATEKKIF, FFQKCIYI,<br>TYLFEATEKKI, IFQKCIYI,<br>FEATEKKIFF                          | 2 | 1:87025657               | CLCA4    |
| EHSAGV, EHSAGVVAL,<br>EHSAGV, EHSAGVVA                                                | 2 | 19:17039884              | CPAMD8   |
| SLLSLQFQV                                                                             | 2 | 5:36985083               | NIPBL    |
| SPVFLNGNYFI, FLNGNYFI,<br>YFIQGPSGVIL                                                 | 2 | 14:61186924              | SIX4     |
| VPAQLRLEA                                                                             | 2 | 8:144996029              | PLEC     |
| LSFAYMPPHL, YMPHLRGRLL,<br>AYMPPHLRGRLL, MPPHLRGRLL,<br>FAYMPPHL                      | 2 | 6:33273072               | TAPBP    |
| QPLQRAAAL, ALAPTDRQLPL                                                                | 2 | 17:70120194--17:70119909 | SOX9     |
| EDMVVALVLAW                                                                           | 2 | 17:39742887              | KRT14    |
| FGMALGTLF, FGMALGTL,<br>TLFVHEHF, FGMALGTLFV,<br>MALGTLFV, RHFGMALGTLF                | 2 | 2:233348755              | ECEL1    |
| TLALTVLKS, QTLALTVLK,<br>TLALTVLK                                                     | 2 | 3:52740182               | SPCS1    |
| LRNPNKDVCLL                                                                           | 2 | 4:39929664               | PDSSA    |
| WRMKAPAKKTL                                                                           | 2 | 10:67680207              | CTNNA3   |
| PRHDGRLYPL                                                                            | 2 | 2:38301663               | CYP1B1   |





|                                                                                                                                                                                                                                                                                                                                                                                                                                                                                                                                                                                                                                                                                                                                                                                                                                                                                                                                                                                                                                                                                                                                                                                                                                                                                                                                                                                                                                                                                                                                                                                                                                                                                                                                                                                                                                                                                                                                                             |                                                                                                                                                                                                                                                                                                                                                                                                                                                                                                                                                                                                                                                                                                                                                                                                                                                                                                                                                                                                                                                                                                                                                                                                                                                                                                                                                                                                                                                                                                                                                                                                                                                                                                                                                                                                                                                                                                                                                                                                                                                                           |
|-------------------------------------------------------------------------------------------------------------------------------------------------------------------------------------------------------------------------------------------------------------------------------------------------------------------------------------------------------------------------------------------------------------------------------------------------------------------------------------------------------------------------------------------------------------------------------------------------------------------------------------------------------------------------------------------------------------------------------------------------------------------------------------------------------------------------------------------------------------------------------------------------------------------------------------------------------------------------------------------------------------------------------------------------------------------------------------------------------------------------------------------------------------------------------------------------------------------------------------------------------------------------------------------------------------------------------------------------------------------------------------------------------------------------------------------------------------------------------------------------------------------------------------------------------------------------------------------------------------------------------------------------------------------------------------------------------------------------------------------------------------------------------------------------------------------------------------------------------------------------------------------------------------------------------------------------------------|---------------------------------------------------------------------------------------------------------------------------------------------------------------------------------------------------------------------------------------------------------------------------------------------------------------------------------------------------------------------------------------------------------------------------------------------------------------------------------------------------------------------------------------------------------------------------------------------------------------------------------------------------------------------------------------------------------------------------------------------------------------------------------------------------------------------------------------------------------------------------------------------------------------------------------------------------------------------------------------------------------------------------------------------------------------------------------------------------------------------------------------------------------------------------------------------------------------------------------------------------------------------------------------------------------------------------------------------------------------------------------------------------------------------------------------------------------------------------------------------------------------------------------------------------------------------------------------------------------------------------------------------------------------------------------------------------------------------------------------------------------------------------------------------------------------------------------------------------------------------------------------------------------------------------------------------------------------------------------------------------------------------------------------------------------------------------|
| <p>           FVIKHSFL 2 1:92769903--1:92772747 RPAP2<br/>           RFRFRGRGLVW 2 19:54974318 LENG9<br/>           KTHSTSMHM.LSSSKTHSTSM, 2 10:94243045 IDE<br/>           SSKTHSTSM.SSSKTHSTSM<br/>           ADYQAVNDEI,YQAVNDEI 2 1:223949290 CAPN2<br/>           YTVELRGATLL 2 17:43480123 ARHGAP27<br/>           SEARYKDVVY 2 2:152548665 NEB<br/>           HSIQDVQFM 2 8:113241029 CSM3<br/>           VEVSSEAPPA 2 X:99662505 PCDH19<br/>           YSSAPRWKACL 2 17:46135788 NFE2L1<br/>           SASTRHVTP,ASTRHVTP, 2 3:195506746 MUC4<br/>           ASTRHVTP,ASTRHVTP<br/>           SRTLTVV, KYVSRRTL, 2 4:141888889 RNF150<br/>           KYVSRRTL, YVSRRTL, KYVSRTLV<br/>           FLSLVHHTY,LQFLSLVHHTY 2 10:50025369 WDFY4<br/>           ASMFQNHVEK,MVFQNHVEK, 2 9:100257990 TDRD7<br/>           MVFQNHVEK, SMVFQNHVEK,<br/>           SMVFQNHVEK<br/>           SRDLAKKLLFL 2 5:98206409 CHD1<br/>           RWSRAVLYH, SARRWSRAV, 2 3:19384132 KCNH8<br/>           RRWSRAV,ARRWSRAV, ARRWSRAV, SARRWSRAV<br/>           YANLPEYF, YANLPEYFKRL 2 11:126126690 FAM118B<br/>           TVFGTLASLY, TVFGTLASL, 2 1:230846185 AGT<br/>           TVFGTLASLY, SPTTVFGTL<br/>           RIDNNSTASYL 2 2:165551820 COBL1<br/>           SYHRLPLW, SYHRLPLWAA 2 2:43452464--2:43452439 ZFP36L2<br/>           HEIHTGERPY 2 22:24086597 ZNF70<br/>           IPPTSRGSSL,PPTSRGSSL 2 17:16285785 UBB<br/>           RTVHAFAM,RTVHAFAM, 2 7:150733024 ABCB8<br/>           HAFAMEQR,RTVHAFAMEQR, TVHAFAMEQR<br/>           SPTEPSTEAL 2 6:32017322 TNXB<br/>           YTIKFEV 2 11:114183101 NNMT<br/>           ITVPRCKVMAY 2 8:104312432 FZD6<br/>           AAVPPTAGAL 2 11:64981481 SLC22A20<br/>           MQLQAIQI, IEMQLQAIQI, 2 2:55756108 CCDC104<br/>           IEMQLQAIQI, MQLQAIQI<br/>           FVICWLPFL 2 3:88040823 HTR1F<br/>           YKQDRDITL, YKQDRDITLL, 2 3:136287655 STAG1<br/>           TLDLINFPI         </p> | <p>           MMGCIDLVEV, NMMGCIDL, 2 1:15901300 AGMAT<br/>           NMMGCIDLVEV<br/>           CSSHFPYL,FPYIQYQFW, 2 3:46414947 CCR5<br/>           FPYIQYQF<br/>           DRVPHLSY,SEVQDRVPH, 2 2:43452464 ZFP36L2<br/>           SEVQDRVPHL<br/>           VAPPTPPPL, QVAPPTPPPL, 2 2:204305619 RAPH1<br/>           VAPPTPPPL, QVAPPTPPPL<br/>           QLLGADSWK, RVQLLGADSWK, 2 18:3452223 TGF1<br/>           LLGADSWK<br/>           AEAADVTA, AEAADVTA, 2 7:100285170 GIGYF1<br/>           AEAADVTA<br/>           EAAAAAGVLY 2 18:48723146 MEX3C<br/>           GLQGSWWA 2 2:11:77920855 USP35<br/>           SRLGGPGRIL 2 6:39272281 KCNK17<br/>           YVIEWGLGPPA 2 1:36935323 CSF3R<br/>           TLNFSVATF, STLNFSVATF, 2 10:94243045 IDE<br/>           FSVATFML, FSVATFMLL, STLNFSVATFM, TLNFSVATFM,<br/>           FSVATFML, VSTLNFSVATF<br/>           LREMVSNM 2 13:46288145 SPERT<br/>           AESLLFLTL, AESLLFL, 2 3:148863159 HPS3<br/>           AESLLFLTL, AESLLFLTL<br/>           SELQPKSKSL, SLMQTRICL 2 13:31735655--13:31732974 HSPH1<br/>           SELVEALSLL, VEALSLLIF, EALSLLIF, VEALSLLI, 2 11:57268319 SLC43A1<br/>           VEALSLLIF<br/>           YPIPVMTV, YPIPVMTV 2 4:5016903 CYTL1<br/>           HPGLRPHLHL, RPHLHL, 2 8:145625525 CPSF1<br/>           HPGLRPHL, HPGCADHPGL<br/>           GLRGLHAL 2 2:43452491--2:43452464 ZFP36L2<br/>           LLASWCVPK, LASWCVPK 2 16:50745399 NOD2<br/>           NVHFASVVNY, VVNYFIEKENY 2 13:48615145 NUDT15<br/>           KMIGGNLKI 2 2:238976762 SCLY<br/>           AQNYVEL 2 3:89259138 EPHA3<br/>           NNSQVPL 2 1:155308000 ASH1L<br/>           ILFPLRL, ILFPLRL 2 6:116836954 FAM26E<br/>           RETEPCML, RETEPCML 2 1:156814053 INSR<br/>           RMQLCTQLAR 2 17:56435161--17:56435252 RNF43<br/>           WRAGGVAV, WAGVAV, 2 14:20852646 TEP1<br/>           WAGVAV, WAGVAV<br/>           MVPNMRMAK 2 4:119951693 SYNPO2<br/>           GMLQIYLL, MSGTGMLQIY 2 18:25565698 CDH2<br/>           HPWTGVGSW 2 1:161068553 KLHDC9         </p> |
| <p>           GLLTASGSAAA 2 15:59981515 BNIP2<br/>           FMDQNYAL, FMDQNYALL, 2 2:116548905 DPP10<br/>           FMDQNYALL<br/>           FRSRPIRRI 2 21:34927647 SON<br/>           MLSALARPVSA, VSAALRRSF, 2 7:75677504 MDH2<br/>           ALARPVSA<br/>           SLQPLGNV 2 11:66055105 YIF1A<br/>           RQIYPPSTCSL 2 2:71191573 ATP6V1B1<br/>           SSLPLRHTSL, LPLRHTSL, 2 12:25232370 LRMP<br/>           LPLRHTSL<br/>           TVASSHRF, TVASSHRFCF 2 7:91732038 AKAP9<br/>           REMRAGGCC, REMRAGGC 2 10:46999601 GPRIN2<br/>           QQAVCFRAW 2 9:117071681 COL27A1<br/>           VPRRQQA, RRQCCASARSF, 2 9:98211549 PTCH1<br/>           VPRRQQA<br/>           KQDKCFSTF, KLKQDKCFSTF 2 13:38154705 POSTN<br/>           GREQRPEV 2 10:46998995 GPRIN2<br/>           AEAKATAETV 2 9:124855330 TLL11<br/>           YRFDLLWGV 2 22:50988099 KLHDC7B<br/>           SELPPGRAW 2 12:110019240 MVK<br/>           FQIRGAAPPYI, AAPPYIYAV, 2 20:47271846 PREX1<br/>           GAAPPYIYAV<br/>           SRPQLRRWL, SRPQLRRWLL, 2 1:85040070 CTBS<br/>           SRPQLRRWLL<br/>           KLDENNTPM 2 5:151051214 SPARC<br/>           FLYKYSIGPL 2 1:79392756 ELTD1<br/>           CQYLHEAY 2 13:32813960 FRY<br/>           YANDAFPEEYM 2 14:63671738 RHOJ<br/>           SRCDRVHIF 2 19:38958286 RYR1<br/>           RSSPRRPL 2 1:36643581--1:36643530 MAP7D1<br/>           VPYSLWI, YSLWIEAMV, 2 4:153881906 FHDC1<br/>           YSLWIEAM<br/>           KLPLLLFKV 2 8:145745194 LRRCL4<br/>           RRSGLWGLRL, CRRSGLWGLRL, 2 16:50745399 NOD2<br/>           RRSGLWGLRLH<br/>           YIFLHYGTQL 2 9:114695180 UGCG<br/>           SSMPSFQAF, LRADASSM 2 7:47344502 TNS3<br/>           SELKMTVSTGL 2 1:100889837 CDC14A<br/>           ATHQWPGSCPR 2 16:50745399 NOD2<br/>           KLHSLHPTSV 2 14:55817461 FBXO34<br/>           QRFPILT, RPLCQRFPTL 2 16:14346300 MKL2         </p>                      | <p>           RMMMTMPIAM, 2 X:39913253 BCOR<br/>           MMTMPIAMCL, IAMCLNLF, MMTMPIAM, RMMMTMPI, TRMMMTMPIAM,<br/>           MMTMPIAM, TRMMMTMPI, MTMPIAMCL, KTRMMMTM, MTMPIAMCLNL<br/>           SQSFFGLF 2 19:48018113 NAPA<br/>           TYKPKQDVVHIL 2 7:122341990 RNF148<br/>           AQWVSVATL 2 9:137693829--9:137677855 COL5A1<br/>           LEHDGHAVSI 2 2:145162528 ZEB2<br/>           QNDYFIRQQY, IQNDYFIRQQY 2 13:60565310 DIAPH3<br/>           AVLIFLPGYDK, VLIFLPGYDK, 2 5:112889319 YTHDC2<br/>           LIFLPGYDK<br/>           VSFEASMLL, VSFEASMLL 2 20:37464776 PPP1R16B<br/>           LLSRLPAI, GRSRTLLSRL, SRTLLSRL, GRSRTLL, 2 1:156715104 HDGF<br/>           TLLSRLPAI<br/>           FQRGLPWRL, LPWRRLDAL 2 15:101427829 ALDH1A3<br/>           SQSRSPVVK, RSSQSRSPVVK, 2 18:34205516 FHOD3<br/>           SQSRSPVVK, SQSRSPVVK, SQSRSPVVK, QSRSPVVK<br/>           RLAAGWRIPL 2 15:84639305 ADAMTSL3<br/>           LPLVPRPL 2 15:93588289 RGM<br/>           VPACVWTCL 2 12:57921401 MBD6<br/>           IYSIPPA, AFRDRNTRIL 2 11:58962827 DTX4<br/>           RPPGWNRM, NRMGEPRGF 2 1:36935323 CSF3R<br/>           GTNVVFTTK, SSGTNVVFTTK 2 5:38510602 LIFR<br/>           ESALQNMK 2 20:36940320 BPI<br/>           KTPPTNAL 2 5:137803132 EGR1<br/>           CSMQDPLLSL 2 3:168833257 MECOM<br/>           LRDGCMLIK, LRDGCMLI, 2 14:65271701 SPTB<br/>           LRDGCMLIKLL<br/>           DPSGGDHF 2 18:48591919 SMAD4<br/>           RRTMRPLPGRI 2 18:658064 C18orf56<br/>           RELALFLTPD, RELALFLTPDP 2 20:49411698 BCAS4<br/>           DEAVSTEVCLM, TEVCLMITDAA 2 5:71482444 MAP1B<br/>           FTDDPTFEF 2 8:121290381 COL14A1<br/>           WSHHTLPI, HVWSHHTLPI, 2 19:990281 WDR18<br/>           APRVWSHHTL         </p>                                                                                                                                                                                                                                                                                 |

|                                                                                          |   |                          |          |                                                                                                                                     |   |                          |          |
|------------------------------------------------------------------------------------------|---|--------------------------|----------|-------------------------------------------------------------------------------------------------------------------------------------|---|--------------------------|----------|
| IQYALDQGMNV, ALDQGMNV,<br>GMNVTQVVF, IQYALDQGM,<br>ALDQGMNVTQV                           | 2 | 19:12918306              | RNASEH2A | IKWVWVPM, LRIYKWPVPM                                                                                                                | 2 | 12:122468668             | BCL7A    |
|                                                                                          |   |                          |          | GOISTLVL, FVGQISTLV                                                                                                                 | 2 | 4:15067858               | CPEB2    |
|                                                                                          |   |                          |          | ILWNVSSL, ILWNVSSL                                                                                                                  | 2 | 5:112170822              | APC      |
| QESSFIWPSFM,<br>FIWPSFMVMTM, QESSFIWPSF,<br>SFMVMTML, FIWPSFMVM,<br>FMVMTMLRNL, FIWPSFMV | 2 | 7:21942715               | CDCA7L   | WMAKPVKSSL, TYAWMAPKV,<br>GTAWMAPKV                                                                                                 | 2 | 1:233482322              | KIAA1804 |
| ITFEGCQPPTV                                                                              | 2 | 11:76256898              | C11orf30 | WRWWTWGG                                                                                                                            | 2 | 3:196674360              | PIGZ     |
| WAFTDFTL, WAFTDFTLNL,<br>LQWAFTDFT, FTDFTLNLTL                                           | 2 | 11:76751166              | B3GNT6   | QMNDARHGGW                                                                                                                          | 2 | 3:178952085              | PIK3CA   |
| LAAGLKSSIM                                                                               | 2 | 6:36452576               | KCTD20   | QETAKFFL, QETAKFFLSL                                                                                                                | 2 | 19:6183180               | ACSBG2   |
| SASQFQSDKY                                                                               | 2 | 13:23904858              | SACS     | CRPWLEQL, CRPWLEQM                                                                                                                  | 2 | X:56591874               | UBQLN2   |
| MTSSRCWTHCL                                                                              | 2 | 15:75942664--15:75942736 | SNX33    | HTAPSLGL, SPWGSHTAPSL,<br>SHTAPSLGL, WGSHTAPSL                                                                                      | 2 | 19:17039884              | CPAMD8   |
| AESNLFLA                                                                                 | 2 | 4:151829982              | LRBA     | STISQNHPTV                                                                                                                          | 2 | 8:145150876              | CYC1     |
| TFSSVPLVASI                                                                              | 2 | 1:22191454               | IRF5     | LLWQLSIL, LSFCEFTI,                                                                                                                 | 2 | 17:19729452              | ULK2     |
| VSLTSLFL                                                                                 | 2 | 5:72199545               | TNPO1    | CLWKLLWQL, CLWKLLWQLSI                                                                                                              | 2 |                          |          |
| CSRPLCSRPL                                                                               | 2 | 7:128587374--7:128587381 | IRF5     | SPWVRRRRL, WVRPRRRL,                                                                                                                | 2 | 22:38477342              | SLC16A8  |
| ATYPKFLANAL                                                                              | 2 | 1:112303389              | DDX20    | SPWVRRRRL                                                                                                                           | 2 | 8:146067469              | ZNF7     |
| VPPPHLCLPL, MPPQVPPPHL,<br>VPPPHLCL                                                      | 2 | 1:204438071              | PIK3C2B  | QOSSSLHHQI                                                                                                                          | 2 |                          |          |
| KQICIPRSL                                                                                | 2 | 3:170013719              | PRKCI    | RTATWVRNLT, ATWVRNLT,<br>RRRTATWVRNL,                                                                                               | 2 | 9:95738900               | FGD3     |
| LYVENQFCEF, YVENQFCEF                                                                    | 2 | 3:195798938              | TRFC     | RRRTATWVRNL, LRTPPRRLTRM,<br>LRTPPRRL                                                                                               | 2 |                          |          |
| HRALQLLHEV, HRALQLLHEVL,<br>HEVLHTMPI, HEVLHTMPIA                                        | 2 | 18:48604787              | SMAD4    | EASQNLSTPPL                                                                                                                         | 2 | 1:233397867              | PCNXL2   |
| YTYQDPRGI, YTYQDPRGI                                                                     | 2 | 19:36317520              | NPHS1    | NEVKDLLRCL                                                                                                                          | 2 | 7:92760715               | SAMD9L   |
| MAASVWLLTSV, MAASVWLL                                                                    | 2 | 3:52543930               | STAB1    | ISYLYTQKF, TYQKFLCRNM,<br>ISYLYTQKF, FAISIYLY,                                                                                      | 2 | 12:9885707               | CLECL1   |
| YIDPSPDYCM                                                                               | 2 | 3:55504335               | WNT5A    | KFAISIYLY                                                                                                                           | 2 |                          |          |
| FSHHPSGSK                                                                                | 2 | 18:34205516              | FHOD3    | QVDQLWDVLL                                                                                                                          | 2 | 1:15850613               | CASP9    |
| WFDQHQIHL                                                                                | 2 | 7:9084495                | ZNF789   | RRAEQRRHL, RRHLQRDL                                                                                                                 | 2 | 17:70119807--17:70119780 | SOX9     |
| LLDDSIYI, LLDDSIYI                                                                       | 2 | 3:113138965              | WDR52    | RARARAPAA, RARARAPA                                                                                                                 | 2 | 16:88599701              | ZFPM1    |
| GPAATSSL, WAGPAATSSL                                                                     | 2 | 19:17836781              | MAP1S    | APGLWMGLAL                                                                                                                          | 2 | 11:6411935               | SMPD1    |
| YLDDRNIFR, EYLDDRNIFR,<br>YLDDRNIF                                                       | 2 | 17:7578217               | TP53     | APPLHRAA                                                                                                                            | 2 | 18:3452223               | TGIF1    |
| SRHTKFGYGV, SRHTKFGY,<br>SRHTKFGYGV                                                      | 2 | 6:121562685              | C6orf170 | RVSPRPLSPL                                                                                                                          | 2 | 13:111368164             | ING1     |
| ILSTKASNTI                                                                               | 2 | 6:116836954              | FAM2E    | FFFFFYFLWI, FFYFLWILWL,<br>FFFFFFSF, YWFFFLFF,<br>TYWFFFLF, FYFLWILWL,<br>FFFFFYFL, YFLWILWL,<br>FFFFFFFY, YWFFFLFFSF,<br>FYFLWILWI | 2 | 6:153019117              | MYCT1    |
| RTVASSPM, RTVASSPMEPL,<br>AAPRTVASSPM,<br>KMWCAPAPRTV, VASSPMEPL                         | 2 | 1:53974841               | GLIS1    | SQNNLYRYV                                                                                                                           | 2 | 19:12433451              | ZNF563   |
| TMIQDTQWV, ILMIQDTQWV,<br>KSTQNGILTM, MIQDTQWV,<br>STQNGILTM                             | 2 | 5:138643806              | MATR3    | QRVTVIRGM                                                                                                                           | 2 | 1:156715104              | HDFG     |
|                                                                                          |   |                          |          | TVALTIHR, GTVALTIHR                                                                                                                 | 2 | 2:40656129               | SLC8A1   |
|                                                                                          |   |                          |          | ILTHIECL                                                                                                                            | 2 | 5:57753012               | PLK2     |
| RDAVASAW                                                                                 | 2 | 1:228504670              | OBSCN    | STPATLTLAV, STPATLTL                                                                                                                | 2 | 19:10202224              | C19orf66 |
| VRVPSVTL, VRVPSVTLV                                                                      | 2 | 18:44400988              | PIAS2    | FLYTDLFLSL                                                                                                                          | 2 | 14:88792776              | KCNK10   |
| ARWESWPV                                                                                 | 2 | 19:17039884              | CPAMD8   | CANSWSTWLSL, CANSWSTWLSL                                                                                                            | 2 | 19:17836781              | MAP1S    |
| SSMFLRFYL, RFLYDASVQRK,<br>LRFYLDASV, SMFLRFYL                                           | 2 | 10:98133400              | TLL2     | NSWSTWLSL                                                                                                                           | 2 |                          |          |
| HEQVYIQS, HEQVYIYST                                                                      | 2 | 3:132051046              | ACPP     | CLHGASCLDGV                                                                                                                         | 2 | 9:126128253              | CRB2     |
| YTLRVQAL, AQYTLRVQAL                                                                     | 2 | 18:59166573              | CDH20    | IAFTTATKM                                                                                                                           | 2 | 13:37569724              | ALG5     |
| GIQSHSLK, CLNGIQSHSLK                                                                    | 2 | 1:235969998              | LYST     | KEITVRGGMFV, KEITVRGGMF,<br>KEITVRGGM                                                                                               | 2 | 22:38895455              | DDX17    |
| LLWPGTALIL, LLWPGTALI,<br>LLWPGTALIL, LLWPGTALI,<br>GLLWPGTALI                           | 2 | 8:144945516              | EPPK1    | YRPWGTGT                                                                                                                            | 2 | 8:67341501               | RRS1     |
| LHQNRFTF                                                                                 | 2 | 12:51497497              | TFPC2    | LSNPLCASPSY                                                                                                                         | 2 | 7:150034378              | LRRCE61  |
| PPVNRGFRAL                                                                               | 2 | 9:137688741--9:137677855 | COL5A1   | YLDRCFARNRV, FARNRVCI,<br>FARNRVCI, FARNRVCI, FARNRVCI,<br>FARNRVCI                                                                 | 2 | 3:194353875              | TMEM44   |
| HPVLTFRAG, TFRAGSRTT,<br>SPTCLGHVPL, TFRAGSRTTC,<br>HPVLTFRAG, TFRAGSRT                  | 2 | 19:10202224              | C19orf66 | LLANDPTYL, TLLANDPTYL                                                                                                               | 2 | 1:1184573                | MTOR     |
| SNYKFLFL, KLFLFLAYSL                                                                     | 2 | 8:17063200               | ZDHHC2   | EEWALLDLAQI                                                                                                                         | 2 | 19:9413107               | ZNF699   |
| FQFYLTGVTQM                                                                              | 2 | 17:56693650              | TEX14    | LQPPALSSVF                                                                                                                          | 2 | 17:7906519               | GUCY2D   |
| YLTGVTQMAYL, YLTGVTQM,<br>FYLTGVTQMAY, FQFYLTGV                                          | 2 |                          |          | EFYKLRFLCF, CFTFCDFV,<br>RFLCFTFCDFV, CFTFCDFVWLL,<br>CFTFCDFVW                                                                     | 2 | 11:111742146             | ALG9     |
| AAAVVTAAF, AAVVTAFTK,<br>AAVTAFTK, AAVVTAAF,<br>AAAVVTAFTK                               | 2 | 7:100285170              | GIGYF1   | RPNQQQQT                                                                                                                            | 2 | 19:58879976              | ZNF837   |
| VTAFTKEASK, AFTKEASK,<br>AAFTKEASK, VTAFTK                                               | 2 | 12:96077487              | NTN4     | RPHSCLADVL, RPHSCLADV,<br>RPHSCLAD, MFRPHSCL,<br>RPHSCLADVLL                                                                        | 2 | 5:112175350--5:112175351 | APC      |
| KLCSCHPV, RPFAPDACKL                                                                     | 2 | 2:84864358               | DNAH6    | ERVGRHVL, ERVGRHVLL,<br>ERVGRHVLLI                                                                                                  | 2 | 22:24225987              | SLC2A11  |
| FMFEGWEIKLV, FMFEGWEIKL,<br>FMFEGWEI                                                     | 2 | 3:48612871               | COL7A1   | WQNSIWHNL, WQNSIWHNLSL                                                                                                              | 2 | 7:4796634                | FOXX1    |
| LESLVFPG                                                                                 | 2 | 9:139752899              | MAMDC4   | TMPPSRSKTL                                                                                                                          | 2 | 5:112175605              | APC      |
| LAGPGLGGY, HLAGPGLGGY                                                                    | 2 | 17:36936775              | PIP4K2B  | SPRRGSSPACS, SPRRGSSP,<br>SPRRGSSPAC                                                                                                | 2 | 1:17265560               | CROCC    |
| FMKITMAKQLL, ITMAKQLLKI                                                                  | 2 | 8:113241029              | CSMD3    | MALCQNAREM                                                                                                                          | 2 | 3:145796919              | PLOD2    |
| LVAARTLPV, TLVAARTLPV                                                                    | 2 | 12:132394804             | ULK1     | GSYGCRLLGF, KTYQGSYGCRLL,<br>KTYQGSYGCR                                                                                             | 2 | 17:7579361               | TP53     |
| LEASINPAM, SRSLSLPL,<br>LEASINPAMV, LRSRSLSLPL                                           | 2 | 17:43482356              | ARHGAP27 | CASVAIGKAL                                                                                                                          | 2 | 1:150530506              | ADAMTSL4 |
| RVCACPGRDWR                                                                              | 2 | 17:7577094               | TP53     | FEEGMWLQY, FEEGMWLQY                                                                                                                | 2 | 7:147914416              | CNTNAP2  |
| HRRCHKFVTF                                                                               | 2 | 19:54387447              | PRKCG    | FLITLITL, FLITLITLGT                                                                                                                | 2 | 17:34313637              | CCLL4    |
| SAAWRSCIAL, IALWCASSV,<br>AAWRSCIAL                                                      | 2 | 1:27106804               | ARID1A   | HLSYHRLPL                                                                                                                           | 2 | 2:43452491--2:43452464   | ZFP36L2  |
| RFLHVFFF, RFLHVFFF,<br>RLKRLHVFFF, RFLHVFFF,<br>VFFLHFL, KRFLHVFFF                       | 2 | 2:230661315              | TRIP12   | EPKGVDPGAL                                                                                                                          | 2 | 12:52215102              | FIGL2    |
| YNPYGPQTL, LYNPYGPQTL                                                                    | 2 | 3:37150132               | LRRFIP2  | REDSRRHGRNW                                                                                                                         | 2 | 19:47768128              | CDC9     |
| EELDALKKPL                                                                               | 2 | 9:106885501              | SMC2     | VPACSHVI                                                                                                                            | 2 | 4:1388944                | CRIPAK   |
|                                                                                          |   |                          |          | LRKVPQAQRL, RRVKVPQAQRL                                                                                                             | 2 | 8:144996029              | PLEC     |
|                                                                                          |   |                          |          | EEFRDQGV                                                                                                                            | 2 | 11:380921                | B4GALNT4 |
|                                                                                          |   |                          |          | STRFLTVPV                                                                                                                           | 2 | 7:139167934              | KLRG2    |
|                                                                                          |   |                          |          | SVRSFMDLK, FMDLKIKL,<br>CSVRSFMDLK, KMISETCSV,<br>MISETCSV, SVRSFMDLKIK                                                             | 2 | 5:72199545               | TNPO1    |









|                                                         |   |                          |          |                                                                      |   |                          |           |
|---------------------------------------------------------|---|--------------------------|----------|----------------------------------------------------------------------|---|--------------------------|-----------|
| SSTPCTVL, LTAPGVCWPL, LTAPGVCWPL                        | 2 | 19:42861055--19:42861727 | MEGF8    | HCMDILFTF, RLHCMDILFTF, CMDILFTF                                     | 2 | 3:38888499               | SCN11A    |
| SQAPCLGTW, CLGTWAWV, SQAPCLGTWAW, RMSTVVSQAPCL          | 2 | 1:110168968--1:110169810 | AMPD2    | SRKKMVHRVV, HRVVCILV, HRVVCILVWLL, HRVVCILVWLL                       | 2 | 2:237489590              | CXCR7     |
| CFSDNALPY, RVCFSDNALPY                                  | 2 | 15:40259920              | EIF2AK4  | TFTPSASPL, FTSPASPL                                                  | 2 | 3:52550119--3:52551362   | STAB1     |
| SSWSGCVVQM                                              | 2 | 17:7402719               | POLR2A   | ITMAKQLL                                                             | 2 | 8:113241029              | CSMD3     |
| VPIPNRPV                                                | 2 | 16:88494491--16:88494506 | ZNF469   | FLTPDPGA                                                             | 2 | 20:49411698              | BCAS4     |
| GRSYDYTPPI                                              | 2 | 11:31812317              | PAX6     | CPASRLAVPA, CPASRLAV                                                 | 2 | 17:36830727              | C17orf96  |
| KSHHRVVFH                                               | 2 | 18:3420516               | FHOD3    | FRDRNTRI, FRDRNTRIL, AFRDRNTRIL                                      | 2 | 11:58962827              | DTX4      |
| QPLSLAI                                                 | 2 | 1:155041387              | EFNA4    | SRSQPSSL, LRPHPPL                                                    | 2 | 19:4816465               | TICAM1    |
| APSALGAL, AAHRAAPSAL, AHRAAPSAL, APSALGALT              | 2 | 6:18122506               | NHLRC1   | VTMSTCLY, YLDPPTCRAIV, VTMSTCLYL                                     | 2 | 10:81072446              | ZMZ1      |
| ALLSEGLDEL, DELPAACL, GLDELPA, GLDELPAACL               | 2 | 20:37555116              | FAM83D   | RRETPTATM, RETPTATM, ARRETPTATM                                      | 2 | 1:16462199               | EPHA2     |
| FLIHWQNTM                                               | 2 | 11:104878041             | CASP5    | TLSPVSAF, FAHQGAQEPPV                                                | 2 | 1:3410404                | MEGF6     |
| VENLYPNDII                                              | 2 | 14:103593950             | TNFAIP2  | TRFGKKNITI                                                           | 2 | 5:56219767               | MIER3     |
| GEKNQLTRDW                                              | 2 | 2:231931680              | PSMD1    | RRAPPACHWL                                                           | 2 | 17:56448298              | RNF43     |
| LPAEKEVTELY, LPAEKEVTEL                                 | 2 | 3:132338375              | ACAD11   | ALGALCHHTF                                                           | 2 | 6:18122506               | NHLRC1    |
| LPRCGCSASS, LPRCGCSAS                                   | 2 | 16:2059622               | ZNF598   | RRGGHLPV, CRRGGHLPV                                                  | 2 | 12:6657973               | IFFO1     |
| IHIPRSLV                                                | 2 | 3:170013720              | PRKCI    | MQHQRWRGSKW                                                          | 2 | 2:189454468              | GULP1     |
| ERALFRSL, ERALFRSLNL                                    | 2 | 4:87671632               | PTPN13   | LQTERSMP, LQTERSMPGAM                                                | 2 | 19:38028415              | ZNF793    |
| IYILPRYVR, YLIPRYVRDL, FIYILPRYV                        | 2 | 21:10916378              | TPTE     | SENPFKDKKI                                                           | 2 | 1:68171151               | NGG12     |
| RWKPLQTVRLM                                             | 2 | 6:151673000              | AKAP12   | QTINNIVFF                                                            | 2 | 8:68116980               | ARFGEF1   |
| VRNSFEVRV                                               | 2 | 17:7577141               | TP53     | EAMFLWRAAV                                                           | 2 | 19:36122298              | RBM42     |
| KSYNFNTF                                                | 2 | 9:99581565               | ZNF782   | TAAARRWWLFV                                                          | 2 | 11:837543--11:837536     | CD151     |
| SSCLQIHR                                                | 2 | 19:44778797--19:44778796 | ZNF233   | TAAARRWWLFV                                                          | 2 | 11:837543--11:837536     | CD151     |
| EQALPLWTV                                               | 2 | 1:108700183              | SLC25A24 | SRLPRIKSQTI                                                          | 2 | 1:156561651              | APOA1BP   |
| LEVEEVSMD                                               | 2 | 11:115099985             | CADM1    | LEGNQIEI, IEIHDQLFAV, NQIEIHDQL, LEGNQIEI                            | 2 | 5:13928280               | DNAH5     |
| FGEEPPAPPV                                              | 2 | X:128926360              | SASH3    | YQNPVQSNFS                                                           | 2 | 13:61103095              | TDSD3     |
| WSHHRML                                                 | 2 | 19:16038110              | CYP4F11  | LSAAAVPV                                                             | 2 | 20:21493012              | NKX2-2    |
| ALFPKGSQSV, ALFPKGSQSV                                  | 2 | 4:48597671               | FRYL     | LARAIGYAA                                                            | 2 | 10:1094906               | IDII      |
| LPAFDAIDM                                               | 2 | 4:8603117                | CPZ      | HAFAGLKIY                                                            | 2 | 3:3886823                | LRRN1     |
| AMILWTLVSL                                              | 2 | 1:46120890               | GPBP1L1  | LSSLCVLLHF, LSSLCVLL, FILPEFHI                                       | 2 | 3:151046142              | P2RY13    |
| LISTNPNFPF                                              | 2 | 17:10258071              | MYH13    | ILLSRYSL, SRYSLVFFL, LLSRYSLVFFL                                     | 2 | 10:101544462             | ABCC2     |
| LRPRSVVI, SFASLRPRSV                                    | 2 | 16:28847356--16:28847350 | ATXN2L   | AVRTSMLTL, AVRTSMLTLL                                                | 2 | 1:204228411              | PLEKHA6   |
| RRSRLELELQI, SRLELELQI                                  | 2 | 11:830670                | EFCAB4A  | ASPPRRPLK                                                            | 2 | 7:150698398              | NOS3      |
| VQLLGADSW                                               | 2 | 18:3452223               | TGIF1    | TRKFTWAL, SAETRFKFTWAL                                               | 2 | 13:99738554              | DOCK9     |
| ISKFCCTGK                                               | 2 | 2:163130424              | IFIH1    | LPWHIQIGL, APLWHIQI, APLWHIQIGI                                      | 2 | 12:66622063              | IRAK3     |
| KFLNSTNSWS, KFLNSTNSW                                   | 2 | 2:27248517               | MAPRE3   | RPRVAAA                                                              | 2 | 2:43452491--2:43452464   | ZFP36L2   |
| RTDVMNVV                                                | 2 | 19:52888438              | ZNF880   | LRSPADPTDL                                                           | 2 | 8:22428658               | SORBS3    |
| SEGNTPLTCM                                              | 2 | 7:100681721              | MUC17    |                                                                      |   |                          |           |
| DPSLCMFFEPL, DPSLCMFF                                   | 2 | 2:46987060               | SOCS5    |                                                                      |   |                          |           |
| IMANMYQWI, IMANMYQWIRV                                  | 2 | 14:96761299              | ATG2B    | APSVRGDAV                                                            | 2 | 20:62321691              | RTEL1     |
| IRGSTLCF, IRGSTLCFL                                     | 2 | 11:14515315              | COPB1    | CNIRFSRHETY, RHETYTVHKRY                                             | 2 | 16:88599701              | ZFPM1     |
| MPAPKSCCTGF, FAFTSPIGL, APKSCCTGF                       | 2 | 19:17955112--19:17954643 | JAK3     | RMMRRQWSLWV, RQWSLWV                                                 | 2 | 6:116836954              | FAM26E    |
| ALLGASAPCGA                                             | 2 | 1:150530506              | ADAMTSL4 | HPKVHLNTMF, MFRRPHSCL                                                | 2 | 5:112175351--5:112175350 | APC       |
| LENIQSIF                                                | 2 | X:138697171              | MCF2     | ASSVLPCHSLL                                                          | 2 | 2:73302665--2:73302655   | RAB11FIP5 |
| KRFEGINDF, KRFEGINI                                     | 2 | 17:11597209              | DNAH9    | VVMDRICSFPL, VVMDRICSF, VMDRICSFPL, VMDRICSF                         | 2 | 6:90397868               | MDN1      |
| HWKSQTLQF                                               | 2 | 4:81967605               | BMP3     | LFPPSTTTKLL, FSNCSGLF, SGLFPSTTTK, GLFPSTTTK, GLFPSTTTK, CSGLFPSTTTK | 2 | 8:100520130              | VPS13B    |
| LVSKARPAL, RPALQAPP, RPALQAPP, RLVSKARPAL, RPALQAPP     | 2 | 9:137688741--9:137677855 | COL5A1   | TVFGGFLKYTV                                                          | 2 | 18:7036080               | LAMA1     |
| KNLKWLLQL                                               | 2 | 22:21988833              | CCDC116  | SRCSPTTSL, LRSRSL, LRSRSLSLPL                                        | 2 | 17:43482356              | ARHGAP27  |
| QPLSATPSRVL                                             | 2 | 1:228559450              | OBSCN    | SLTCSWL                                                              | 2 | 11:66055105              | YIF1A     |
| HRKELCSSV                                               | 2 | 2:100210199              | AFB3     | RPSTRFLTVP, RPSTRFLT, SPRPSTRFLT                                     | 2 | 7:139167934              | KLRG2     |
| IPRRHTRST                                               | 2 | 12:4479724               | FGF23    | RLFHPWTTDM                                                           | 2 | 2:171572940              | SP5       |
| KRSAWRKTTWL                                             | 2 | 16:57113024              | NLRC5    | WTVAPTAL, HQVPCWCPW                                                  | 2 | 17:416107000             | ETV4      |
| RQHRSALMTF                                              | 2 | 16:50745399              | NOD2     | RPLPARDKHAL, LPARDKHAL                                               | 2 | 6:70423652               | LMBRD1    |
| AAAPTQQL, RAAAPTQQL                                     | 2 | 1:228559450              | OBSCN    | MPPSPMASL, MASLWSTV                                                  | 2 | 19:17836781              | MAP1S     |
| LESWRRTW                                                | 2 | 10:102762593             | LZTS2    | HEIHTGGKPY, YASHIVQHEI, YASHIVQHEI                                   | 2 | 19:38230678              | ZNF573    |
| TRPEPPPAPV, TRPEPPPAPVL                                 | 2 | 3:52550119               | STAB1    | YILGSVDK                                                             | 2 | 12:124317763             | DNAH10    |
| YLRFGVQL, ILYLRFVQVQL                                   | 2 | 6:159049469              | TMEM181  | SERDYNMDF, RESERDYNM, RDYNMDF, RDYNMDF, RDYNMDF, RESERDYNMDF         | 2 | 1:100889837              | CDC14A    |
| AEAPADCGPAQ                                             | 2 | 8:145747920              | LRRC24   | HLVVSQSIYH, KLHLVSQSIY, KLHLVSQSIYH                                  | 2 | 3:193332592              | OPA1      |
| DRIGYFPAL                                               | 2 | 17:73501069              | CASKIN2  | FTSLSSASLPR, TSLSSASLPR, LSSASLPR                                    | 2 | 16:50745399              | NOD2      |
| QLLNQIQR                                                | 2 | 6:109294665              | ARMC2    | RSRRNVGLY                                                            | 2 | 14:59113430              | DACT1     |
| FVIVFAYV, FVIVFAY                                       | 2 | 2:167162315              | SCN9A    | SYHYVFFL, YVFFLNTY                                                   | 2 | 1:63021531               | DOCK7     |
| SSAARAGM                                                | 2 | 7:100285170              | GIGYF1   | RATEVPSLTAL, FLAGDGRATEV                                             | 2 | 2:1481231                | TPO       |
| FASVVNYFI                                               | 2 | 13:48615145              | NUDT15   | MRGPPPLMPL                                                           | 2 | 1:149895562              | SFB4      |
| IQLMTRNFW, SAKNSNIQLM, QLMTRNFWPM, MTRNFWPM, LMTTRNFWPM | 2 | 8:92352747               | SLC26A7  | QRHWSSKINL, QRHWSSKI                                                 | 2 | 6:158850873              | TULP4     |
| SLLERVLFYR, MSLLERVLFYR, RVLFYRAR                       | 2 | 3:3067806                | CNTN4    | RRVQRLTL, CRRVQRLTL                                                  | 2 | 11:64597506              | CDC42BPB  |
| LLTSKLFYSK, TSKLFYSK, LTSKLFYSK                         | 2 | 7:34989478               | DPY19L1  | MMLPVRARTAR, RSALPQGRAPL, MMLPVRAR                                   | 2 | 18:34205516              | FHOD3     |
| TRWLPQAAL                                               | 2 | 1:27088681--1:27088668   | ARID1A   | KDVWNFKAW, FESLCSKDVW                                                | 2 | 17:38711971              | CCR7      |
| RTAAWQLCCR                                              | 2 | 16:50745399              | NOD2     | FQMMEGKAF, QMMEGKAF                                                  | 2 | 11:124845049             | CCDC15    |
| RVLNPCLPSIM                                             | 2 | 22:38895455              | DDX17    | RWKPLQTVL, RWKPLQTV                                                  | 2 | 6:151673000              | AKAP12    |
| SRASGTARTWL, RASGTARTWL                                 | 2 | 17:80049354              | FASN     |                                                                      |   |                          |           |
| AMMCASSTSW, AMMCASSTSWR, MMCASSTSWR                     | 2 | 8:22054260--8:22054259   | BMP1     |                                                                      |   |                          |           |
| HRSHLQHQRI                                              | 2 | 19:57840047              | ZNF543   |                                                                      |   |                          |           |

|                                                                        |   |                          |          |
|------------------------------------------------------------------------|---|--------------------------|----------|
| FTMARASVNEW,<br>TARPLSLTSLF,FTMARASV<br>ATQASMTL                       | 2 | 1:155221333--1:155221578 | FAM189B  |
| AEVLSHDHIAFL, AEVLSHDHIAF,<br>DEAEVLSDDH, VLSHDHIAFL,<br>LSDHIAFL      | 2 | 22:20130522--22:20130515 | ZDHHC8   |
| GPKSLRPPV, SPSGPKSL,<br>RPPVWAPPT                                      | 2 | 19:39330959--19:39330958 | HNRNPL   |
| RKLEAFFAF, FAFSSLLWPS<br>HAWSRRLRGL                                    | 2 | 12:51392999              | SLC11A2  |
| SSAARRSNFR, SAARRSNFR,<br>ASSAARRSNFR                                  | 2 | 19:49376582              | PPPIR15A |
| KLFSELEF, NEPWYKLF<br>YQMLQDQDF                                        | 2 | 2:60688969               | BCL11A   |
| CRNLWLTSM                                                              | 2 | 10:97135757              | SORBS1   |
| SLHNRWTWYV, LQSLHNRWTW<br>GETQNTFL, LEEPGETQNTF                        | 2 | 16:20673143              | ACSM1    |
| FRTESPPAQAV, TESPPAQAVM,<br>TESPPAQAV, TESPPAQAVML                     | 2 | 1:110168968--1:110169810 | AMPD2    |
| VLGGKAAIPEV                                                            | 2 | 3:57561285               | ARF4     |
| SEPLATPRHQY, LATPRHQYY<br>HMDCLRWL                                     | 2 | 20:5903379               | CHGB     |
| SRNKSELL                                                               | 2 | 10:102762593             | LZTS2    |
| HPQWGSQV, HPQWGSQVPR<br>RTLNGSQM                                       | 2 | 1:62672556               | LITD1    |
| SVDPPFQVK, LLASVDPPFQV,<br>SVDPPFQV                                    | 2 | X:47072566               | UBA1     |
| YLGRTLLV, YLGRTRLLVTCL,<br>NWNAYLGRTRL                                 | 2 | 12:133250289             | POLE     |
| HECSLWGSWL                                                             | 2 | 12:58025103              | B4GALNT1 |
| AQNLSYLNL                                                              | 2 | 20:62326110              | RTEL1    |
| RATPLSSL, SRRATPLSSL,<br>RRATPLSSL                                     | 2 | 19:18497024              | GDF15    |
| VAMWISSVF, RVAMWISSV,<br>VAMWISSV, RVAMWISSVF,<br>AMWISSVFEA, AMWISSVF | 2 | 14:30068249              | PRKD1    |
| YASAVSSL                                                               | 2 | 10:890939                | LARP4B   |
| ITYSHSPPR                                                              | 2 | 19:44150698              | PLAUR    |
| FLWTKDGNPF                                                             | 2 | 14:104026187             | BAG5     |
| STASPCSLTSL, TASPCLTSLR                                                | 2 | 12:124848228             | NCOR2    |
| LAAPGGRARL, RARLQGGRQTM                                                | 2 | 6:36452576               | KCTD20   |
| ASATSTPSR, STSTPSRQLHR<br>RLPELRQPQRL                                  | 2 | 6:42957352               | PPP2R5D  |
| FIHLRISAYM                                                             | 2 | 12:20522723              | PDE3A    |
|                                                                        | 2 | 3:369855                 | CHL1     |
|                                                                        | 2 | 8:22054260--8:22054259   | BMP1     |
|                                                                        | 2 | 20:21493012              | NKX2-2   |
|                                                                        | 2 | 16:50745399              | NOD2     |
|                                                                        | 2 | 2:43452439--2:43452244   | ZFP36L2  |
|                                                                        | 2 | 6:51889974--6:51890015   | PKHD1    |

|                                                                                                                   |   |                            |          |
|-------------------------------------------------------------------------------------------------------------------|---|----------------------------|----------|
| HEHAQREVQRL                                                                                                       | 2 | 1:17266536                 | CROCC    |
| FPALACSL, FPALACSL, FPALACSL,<br>FPALACSL                                                                         | 2 | 2:36825137                 | FEZ2     |
| APTSCGPTRA                                                                                                        | 2 | 8:120220776                | MAL2     |
| RPPELQQLL                                                                                                         | 2 | 17:70119909--17:70120194   | SOX9     |
| GWEPQIQT                                                                                                          | 2 | 2:68544315                 | CNRIP1   |
| YNVLDALRYFV, GLYNVDALR,<br>LYNVLDALRYF, YNVLDALRYF<br>AMTPPVLTAK, TTAKTYSV,<br>LTTAKTYSV, MTPPVLTAK,<br>VLTAKTYSV | 2 | 8:28385376                 | FZD3     |
| ILLGGSTSSWA                                                                                                       | 2 | 3:151163622                | IGSF10   |
| RRAHERPPI, RAHERPPI,<br>RAHERPPI, SRRAHERPPI                                                                      | 2 | 17:16330835                | TRPV2    |
| KRIPQIRI                                                                                                          | 2 | 15:59376343                | RNF111   |
| VEVYVQLV, AQVEVYVQLV,<br>VEVYVQLV                                                                                 | 2 | 13:73347916                | DIS3     |
| CLHLPSPPV                                                                                                         | 2 | 6:105198346                | HACE1    |
| HQTSVLSF, FTTANTVPTAI                                                                                             | 2 | 12:121432115--12:121432118 | HNFA1    |
| LRHKRDKYL, RYVYDLRHKRDK                                                                                           | 2 | 9:109689491                | ZNF42    |
| CPASCSGCYSW, SLLRFCPA,<br>WTIPPTGSPF, CPASCSGCY                                                                   | 2 | 8:77617034                 | ZFH4     |
| YSAPVPPNAL, FYSAPVPPNAL                                                                                           | 2 | 7:100855927                | PLOD3    |
| RTSYLENK, TSYLENKLSCK                                                                                             | 2 | 20:33328934                | NCOA6    |
| ISVTPPLQPY, ISVTPPL                                                                                               | 2 | 1:247588527                | NLRF3    |
| SPADPTDL                                                                                                          | 2 | 1:62253580                 | INADL    |
| CRVSTWQGT, STWQGTAL                                                                                               | 2 | 8:22428658                 | SORBS3   |
| YPPDNLRYM                                                                                                         | 2 | 19:7592444--19:7592423     | MCOLN1   |
| IACRVTPM                                                                                                          | 2 | 19:50462324                | SIGLEC11 |
| FSYLIHEI                                                                                                          | 2 | 16:2059622                 | ZNF598   |
| LECRTRHPNM, CRTRHPNMEL,<br>CRTRHPNM, RTRHPNMEL,<br>TRHPNMEL                                                       | 2 | 19:12059564                | ZNF70    |
| SLYQYFENF                                                                                                         | 2 | 16:10729660                | TEKTS    |
| FAFSSLLW, WPSHLDMSML,<br>FSSLLWPSHL, WPSHLDMSM                                                                    | 2 | 14:78045431                | SPTLC2   |
| GRLPALSL, GRHAPGRL,<br>GRLPALSL                                                                                   | 2 | 12:51392999                | SLC11A2  |
| YTQSEMEF, YTQSEMEF,<br>YTQSEMEFL                                                                                  | 2 | 17:46629736                | HOXB3    |
| EEGCGASGTW, GEEGCGASGTW                                                                                           | 2 | 1:237947200                | RYR2     |
| RSFQIHR                                                                                                           | 2 | X:153042691                | PLXNB3   |
| AATLRCPAV                                                                                                         | 2 | 19:12574841--19:12574925   | ZNF709   |
| RRIQSRSPFPL, PFLYSGRLL                                                                                            | 2 | 3:51417604                 | DOCK3    |
|                                                                                                                   | 2 | 11:46702223--11:46702224   | ARHGAP1  |

|                                                                                              |   |                            |          |
|----------------------------------------------------------------------------------------------|---|----------------------------|----------|
| MQNHTAEKPY                                                                                   | 2 | 19:37441368                | ZNF568   |
| ATASAAPRPR, ATASAAPR,<br>RAATASAAPR                                                          | 2 | 17:70119870--17:70119913   | SOX9     |
| SRWMTSLI                                                                                     | 2 | 16:14346300                | MKL2     |
| KLWNLMMPM                                                                                    | 2 | 4:141461344                | ELMOD2   |
| WRQLWFLLLL, WRQLWFLLL,<br>WFLLLLLLPGA, FLLLLLPGA,<br>WRQLWFL, WFLLLLLL,<br>RQLWFL, WRQLWFLLL | 2 | 1:179051300                | TOR3A    |
| KVDPVSLRKV                                                                                   | 2 | 5:176026129--5:176026138   | GPRIN1   |
| VEAMPLCLL, WEVEAMPLCL,<br>VEAMPLCL, WEVEAMPLCLL,<br>VEAMPLCLLPA                              | 2 | 2:120005381                | STEAP3   |
| YSVANLAKYL                                                                                   | 2 | 5:140515167                | PCDHB5   |
| FKHPHVANPQL                                                                                  | 2 | 13:113854748               | PCID2    |
| ILFSTWVF                                                                                     | 2 | 8:142221695                | SLC45A4  |
| PLDSSPLQLL                                                                                   | 2 | 3:77657038                 | ROBO2    |
| FADMERHHILF                                                                                  | 2 | 3:25668727                 | TOP2B    |
| HRHGLPAEL                                                                                    | 2 | 1:27088681--1:27088668     | ARID1A   |
| TPACTASC                                                                                     | 2 | 11:76751542--11:76751604   | B3GNT6   |
| VSSSTVSSVM, SSSTVSSVM,<br>SSTVSSVM                                                           | 2 | 3:183508631                | YEATS2   |
| TAHVTDMDV, VEVETVTQAA,<br>ITAAHVTDMDV                                                        | 2 | X:135956571--X:135956575   | RBMX     |
| LYIQNALN                                                                                     | 2 | 12:122018773--12:122018740 | KDM2B    |
| CRRPWPPRL, RRPWPPRL,<br>RRPWPPRLTPL                                                          | 2 | 12:132394804               | ULK1     |
| HERGALPRRAL                                                                                  | 2 | 17:70117710--17:70117715   | SOX9     |
| YVPGTNETL                                                                                    | 2 | 16:77353780                | ADAMTS18 |
| LPSKPFANSSL                                                                                  | 2 | 22:28389367                | TTC28    |
| IQCFILMYF                                                                                    | 2 | 7:33014804                 | FKBP9    |
| VLISPLMCV, WLVLISPL,<br>WLVLISPLMCV, TALKIWLVL                                               | 2 | 6:30864547--6:30863251     | DDR1     |
| RPSRRGPEA, AEAEAAPASPL<br>ATWLSLAL                                                           | 2 | 16:88599701                | ZFPM1    |
| RQLSSKSLW                                                                                    | 2 | 10:124895627               | HMX3     |
| LRLELAKM                                                                                     | 2 | 14:75230947                | YLP1M1   |
| TVDCINCLL, TVDCINCLLL                                                                        | 2 | 1:39332608                 | MYCBP    |
| VPCSMQDPL                                                                                    | 2 | 3:151046142                | P2RY13   |
| RNNSAFLK, RNNSAFLK,<br>IRNNSAFL, NIRNNSAFLK                                                  | 2 | 3:168833257                | MECOM    |
| RRPGGQLRL, RRGPGGQLRLM,<br>GRRPGGQLRL, LMLPSSARPW,<br>RRPGGQL                                | 2 | 18:56202169                | ALPK2    |
|                                                                                              | 2 | 9:17135271                 | CNTLN    |

|                                                                          |   |                          |          |
|--------------------------------------------------------------------------|---|--------------------------|----------|
| LARPVSA                                                                  | 2 | 7:75677504               | MDH2     |
| HPHRRHPGCA,<br>HPGGCADHPGL,<br>RPHHPHRRHPG                               | 2 | 8:145625525              | CPSF1    |
| KDNIFGTVI                                                                | 2 | 5:38510602               | LIFR     |
| SLWIEAMVLK, WIEAMVLK,<br>SLWIEAMVLK, NYSLWIEAM,<br>YSLWIEAMVLK           | 2 | 4:153881906              | FHDC1    |
| KLRQNY, LRQNYM,<br>GEDIFWTC, GEDIFWTCMLN<br>REAAAAGV                     | 2 | 2:234078674              | INPP5D   |
| TTPPPPLL                                                                 | 2 | 16:11141159              | CLEC16A  |
| FRATPLQGM, FRATPLQGM,<br>QACLTFRGSW                                      | 2 | 18:48723146              | MEX3C    |
| DVPTTSSLV                                                                | 2 | 1:109792735              | CELSR2   |
| LSFWQLTF                                                                 | 2 | 2:238289624              | COL6A3   |
| LMNLATADLL                                                               | 2 | 10:64564892              | ADO      |
| TRTLCFPRPV, FQMHTRTLCL,<br>CLFPRPVAF, FQMHTRTLCLF                        | 2 | 19:13882968              | MRI1     |
| KSYKMNGREY                                                               | 2 | 3:151046142              | P2RY13   |
| MRWSSQTCSL, RRMTRPNM                                                     | 2 | 19:17000632              | F2RL3    |
| SATVAFWRS                                                                | 2 | 11:47304002              | MADD     |
| ELRALREM                                                                 | 2 | 2:202514862              | MPP4     |
| TMLHGQVMDQK                                                              | 2 | 19:5231449               | PTPS     |
| QONELKTY                                                                 | 2 | 19:51015404              | ASPDH    |
| TRTFIAARTFV, VTRTFIAAR,<br>TRTFIAARTF                                    | 2 | 13:46288145              | SPERT    |
| SQTHLNTL                                                                 | 2 | 15:42371752              | PLA2G4D  |
| MANRNHLK, KMANRNHL                                                       | 2 | X:84526620               | ZNF711   |
| RQTSFCTLTW                                                               | 2 | 13:94482727              | GPC6     |
| QEQQNVLKVL, QEQQNVLKVL                                                   | 2 | 15:72143639              | MYO9A    |
| REVITVYQLF, REVITVYQL,<br>REVITVYQLF                                     | 2 | 5:33576343               | ADAMTS12 |
| FRLFIQNL, FQNLFFQI,<br>FRLFIQNLFF, FRLFIQNLFF,<br>RRTTFRFL, RFLFIQNLFFQI | 2 | 22:50297991              | ALG12    |
| HTEMIKKEER                                                               | 2 | 18:73000406              | TSHZ1    |
| TDGLVREW                                                                 | 2 | 16:83251091              | CDH13    |
| SATEEGNTQVL                                                              | 2 | 3:98506942               | ST3GAL6  |
| SPSVHNKET, SPSVHNKETA                                                    | 2 | 15:52244057              | LEO1     |
| FHRIQNQL, NQLQLFRNFFL,<br>FHRIQNQLQL                                     | 2 | 2:1233482260             | KIAA1804 |
| SRLLSRTAM                                                                | 2 | 9:124855211              | TLL11    |
| LTSPAVCL                                                                 | 2 | 3:195518119              | MUC4     |
| CPMTACSL, CPMTACSI                                                       | 2 | 6:117622233              | ROS1     |
|                                                                          | 2 | 10:114900984             | TCF7L2   |
|                                                                          | 2 | 6:83819938               | DOPEY1   |
|                                                                          | 2 | 22:20130515--22:20130522 | ZDHHC8   |

|                                                                             |   |                                         |                 |
|-----------------------------------------------------------------------------|---|-----------------------------------------|-----------------|
| YFREAYFWL, TRNILDYF,<br>LDYFREAYFWL                                         | 2 | 3:31666425                              | STT3B           |
| FFYRHPSY                                                                    | 2 | 1:205589099                             | ELK4            |
| ARCPRVGCL                                                                   | 2 | 16:28847356--16:28847350                | ATXN2L          |
| LEKAVQSFYW, LEKAVQSFY                                                       | 2 | 6:107361391                             | C6orf203        |
| FQNWKWITVYL, FQNWKWITV                                                      | 2 | 7:103205756                             | RELN            |
| FFFGFWLV                                                                    | 2 | 19:56249721                             | NLRP9           |
| SPASACTMPPL, QPSPASACTM,<br>MPPLHPQW, SPASACTM                              | 2 | 17:48433967                             | XYLT2           |
| SQLPASSPTK                                                                  | 2 | 18:34205516                             | FHOD3           |
| YQWNITSPEV, QQWNITSPEV                                                      | 2 | 7:4056840                               | SDK1            |
| SPLDSSPL                                                                    | 2 | 3:77657038                              | ROBO2           |
| YWKRHIEL, NYWKRHIEL                                                         | 2 | 7:73021716                              | MLXIPL          |
| GLGDGPAQPEI                                                                 | 2 | 19:55815035                             | BRSK1           |
| GEWGAFNDIMW                                                                 | 2 | 14:102463483                            | DYNC1H1         |
| HSNDGGNILYY                                                                 | 2 | 1:65332611                              | JAK1            |
| SQNTRVPRLPK                                                                 | 2 | 6:32918419                              | HLA-DMA         |
| YSAAPGAPPL                                                                  | 2 | 10:102587324                            | PAX2            |
| TRKSPALSAL                                                                  | 2 | 3:52550119                              | STAB1           |
| HPQRKRRGGPP, PPSPLAL,<br>GPPSPPLAL                                          | 2 | 17:56435161                             | RNF43           |
| LEKNVPLRVKI, FLEKNVPL                                                       | 2 | 1:156931470                             | ARHGFE11        |
| KVWSRTAYL, SSAKVWSRTAY                                                      | 2 | 12:64819643                             | XPOT            |
| YLDPPTCRAI, YLDPPTCRAIV,<br>SYLDPPTCRAI                                     | 2 | 10:81072446                             | ZMIZ1           |
| REIQTAVHLLL, REIQTAVHLL,<br>REIQTAVHL                                       | 2 | 6:27783120                              | HIST1H2BM       |
| LLVSSPPSGV, WLLVSSPPSGV                                                     | 2 | 1:85040070                              | CTBS            |
| YSTQYGLKL                                                                   | 2 | 2:159537101                             | PKP4            |
| GRPLRPPI                                                                    | 2 | 8:54792097                              | RGS20           |
| KRDQCQOM                                                                    | 2 | 11:124845049                            | CCDC15          |
| MDFSLVFSPSF                                                                 | 2 | 4:113540617                             | C4orf21         |
| WPCLWNSLLRF, SLLRFCPA,<br>WPCLWNSLL, WPCLWNSL                               | 2 | 7:100855927                             | PLOD3           |
| WRVEQRKIL, WRVEQRKILL,<br>WRVEQRKI, RIQDFVWR                                | 2 | 5:14336771                              | TRIO            |
| YKNFLRCL, YKNFLRCLVI,<br>LRSAAEYKNFL, AYKNFLRCLV,<br>AYKNFLRCL, AYKNFLRCLVI | 2 | 15:75694278                             | SIN3A           |
| FTRQSTGTIAY, QSTGTIAY<br>LEYFMKQINDA, LEYFMKQI                              | 2 | 4:187158051--4:187158019<br>3:178952074 | KLKB1<br>PIK3CA |

|                                                                                         |   |                          |         |
|-----------------------------------------------------------------------------------------|---|--------------------------|---------|
| MEANMSIPSM                                                                              | 2 | 14:105408302             | AHNAK2  |
| LEBSSGNLLV                                                                              | 2 | 17:7577141               | TP53    |
| HQADNLLM, SRHQADNLLM,<br>SRHQADNLL, SRHQADNL                                            | 2 | 22:40356095              | GRAP2   |
| SEAPGAQYPP                                                                              | 2 | 19:12996740              | KLF1    |
| HICRRFK                                                                                 | 2 | 18:74154167              | ZNF516  |
| SLKEKVNLLQK                                                                             | 2 | 5:13920716               | DNAH5   |
| LPQGRDDL, LPQGRDDLRA                                                                    | 2 | 8:145625525              | CPSF1   |
| SEREREAL                                                                                | 2 | 17:70117715--17:70117710 | SOX9    |
| VYGGNVVMLV                                                                              | 2 | 17:65119099              | HELZ    |
| MLVMHNMFSHR,<br>SYMLVMHNM, VMHNMFSH,<br>MLVMHNMFSH, VMHNMFSHR,<br>LVMHNMFSHR, SYMLVMHNM | 2 | 12:57992945              | PIP4K2C |
| FRTRARKGEKF                                                                             | 2 | 11:58962827              | DTX4    |
| YAVSLAAL, SASYAVSL,<br>SASYAVSLAAL                                                      | 2 | 19:47549454              | TMEM160 |
| LQSSLNPAASV                                                                             | 2 | 14:76368544              | TTL5    |
| NSFKYLLDQLK                                                                             | 2 | 12:112479863             | NAA25   |
| NQIVIRGLNTI                                                                             | 2 | 3:41277291               | CTNNB1  |
| FTSLSSASL                                                                               | 2 | 16:50745399              | NOD2    |
| QRFNPAFNI, FRGQRFPAM                                                                    | 2 | 7:44425654               | NUDCD3  |
| FVIIVFAYL, FVIIVFAY                                                                     | 2 | 2:167162315              | SCN9A   |
| SARTGRSV, SARTGRSVSA                                                                    | 2 | 22:20130515--22:20130522 | ZDHC8   |
| MRSSELPL                                                                                | 2 | 18:56887507              | GRP     |
| GPRMQLCT, SPPLALGPRM,<br>PPLALGPRMQL,<br>GPRMQLCTQLA                                    | 2 | 17:56435161              | RNF43   |
| LLDSLEPL, VENRAEMALL,<br>AEMALLDSLEP, AEMALLDSLE,<br>AEMALLDS, VENRAEMAL,<br>AEMALLDSL  | 2 | 3:48612871               | COL7A1  |
| TRSCISL                                                                                 | 2 | 1:155308000              | ASH1L   |
| STLNFSALLM                                                                              | 2 | 10:94243045              | IDE     |
| IQNYHLRGIGM                                                                             | 2 | 1:85020800               | CTBS    |
| ALHPLWWA, ALHPLWWATA                                                                    | 2 | 1:206650063              | IKBKE   |
| DEDIVTILQA, DEDIVTILQAT,<br>DEDIVTIL                                                    | 2 | 20:1445016               | NSFL1C  |

**Table S5:** Accession numbers of the microarray profiles of colorectal cancer

| <b>Dataset</b>  | <b>Platform</b>                | <b>#Sample</b> | <b>Publication (PMID)</b> |
|-----------------|--------------------------------|----------------|---------------------------|
| <u>TCGA</u>     | RNAseqV2                       | 538            | <u>22810696</u>           |
| <u>GSE12945</u> | HG-U133A                       | 62             | <u>19399471</u>           |
| <u>GSE41258</u> | HG-U133A                       | 187            | <u>19359472</u>           |
| <u>GSE14333</u> | HG-U133_Plus_2                 | 290            | <u>19996206</u>           |
| <u>GSE17538</u> | HG-U133_Plus_2                 | 240            | <u>22115830</u>           |
| <u>GSE29623</u> | HG-U133_Plus_2                 | 130            | <u>22362069</u>           |
| <u>GSE33113</u> | HG-U133_Plus_2                 | 90             | <u>22496204</u>           |
| <u>GSE39582</u> | HG-U133_Plus_2                 | 566            | <u>23700391</u>           |
| <u>GSE24549</u> | HuEx-1_0-st                    | 83             | <u>21619627</u>           |
| <u>GSE24550</u> | HuEx-1_0-st                    | 77             | <u>22991413</u>           |
| <u>GSE30378</u> | HuEx-1_0-st                    | 95             | <u>22991413</u>           |
| <u>GSE28722</u> | Rosetta custom human 23K array | 125            | <u>21251323</u>           |

**Table S6:** List of features used for the regression model.

| <b>Parameter</b>      | <b>Description</b>           |
|-----------------------|------------------------------|
| HLA-A                 | Antigen presenting machinery |
| HLA-B                 | Antigen presenting machinery |
| HLA-C                 | Antigen presenting machinery |
| HLA-E                 | Antigen presenting machinery |
| HLA-G                 | Antigen presenting machinery |
| HLA-F                 | Antigen presenting machinery |
| Neo-antigen frequency | Antigen presenting machinery |
| B2M                   | Antigen presenting machinery |
| TAP1/2                | Antigen presenting machinery |
| Heterogeneity         | Tumor heterogeneity          |
| Treg                  | Immunosuppressive TILs       |
| MDSC                  | Immunosuppressive TILs       |
| ATAD2                 | Cancer germline antigens     |
| CASC5                 | Cancer germline antigens     |
| CEP55                 | Cancer germline antigens     |
| CASC5                 | Cancer germline antigens     |
| CSAG1                 | Cancer germline antigens     |
| CSAG2                 | Cancer germline antigens     |
| CTAGE5                | Cancer germline antigens     |
| CTCF                  | Cancer germline antigens     |
| DCAF12                | Cancer germline antigens     |
| GPATCH2               | Cancer germline antigens     |
| KDM5B                 | Cancer germline antigens     |
| KIAA0100              | Cancer germline antigens     |
| LEMD1                 | Cancer germline antigens     |
| MAGEA12               | Cancer germline antigens     |
| MAGEA2                | Cancer germline antigens     |
| MAGEA3                | Cancer germline antigens     |
| MAGEA6                | Cancer germline antigens     |
| IGF2BP3               | Cancer germline antigens     |
| MPP1                  | Cancer germline antigens     |
| NUF2                  | Cancer germline antigens     |
| ODF2                  | Cancer germline antigens     |
| OIP5                  | Cancer germline antigens     |
| PBK                   | Cancer germline antigens     |
| PIWIL1                | Cancer germline antigens     |
| POTEE                 | Cancer germline antigens     |
| RQCD1                 | Cancer germline antigens     |
| SPA17                 | Cancer germline antigens     |
| SPAG1                 | Cancer germline antigens     |
| SPAG4                 | Cancer germline antigens     |
| SPAG9                 | Cancer germline antigens     |
| TTK                   | Cancer germline antigens     |
| ZNF165                | Cancer germline antigens     |
| SEMG1                 | Cancer germline antigens     |
| IDO                   | co-inhibitor                 |
| PDL1                  | ligand                       |

|        |               |
|--------|---------------|
| B7H2   | ligand        |
| CD28   | co-stimulator |
| ICOS   | co-stimulator |
| LAG3   | co-inhibitor  |
| BTLA   | co-inhibitor  |
| CD160  | co-inhibitor  |
| B7DC   | ligand        |
| HVEM   | ligand        |
| CD137L | ligand        |
| OX40   | co-stimulator |
| OX40L  | ligand        |
| CD70   | co-stimulator |
| GITRL  | ligand        |
| GITR   | co-stimulator |
| BAFF   | ligand        |
| BAFFR  | co-stimulator |
| APRIL  | ligand        |
| CD40L  | co-stimulator |
| CD40   | ligand        |
| TACI   | co-stimulator |
| AIMP1  | Cytokine      |
| BMP10  | Cytokine      |
| BMP13  | Cytokine      |
| BMP2   | Cytokine      |
| BMP4   | Cytokine      |
| BMP5   | Cytokine      |
| BMP6   | Cytokine      |
| BMP7   | Cytokine      |
| CSF2   | Cytokine      |
| CSF3   | Cytokine      |
| CTF1   | Cytokine      |
| EDA2R  | Cytokine      |
| IFNA1  | Cytokine      |
| IFNA13 | Cytokine      |
| IFNA14 | Cytokine      |
| IFNA16 | Cytokine      |
| IFNA17 | Cytokine      |
| IFNA2  | Cytokine      |
| IFNA21 | Cytokine      |
| IFNA4  | Cytokine      |
| IFNA5  | Cytokine      |
| IFNA6  | Cytokine      |
| IFNA7  | Cytokine      |
| IFNA8  | Cytokine      |
| IFNAR1 | Cytokine      |
| IFNAR2 | Cytokine      |
| IFNG   | Cytokine      |
| IFNGR1 | Cytokine      |
| IFNGR2 | Cytokine      |
| IFNK   | Cytokine      |

|         |          |
|---------|----------|
| IL10    | Cytokine |
| IL10RB  | Cytokine |
| IL11    | Cytokine |
| IL12B   | Cytokine |
| IL12RB1 | Cytokine |
| IL12RB2 | Cytokine |
| IL13    | Cytokine |
| IL15RA  | Cytokine |
| IL16    | Cytokine |
| IL17B   | Cytokine |
| IL17RA  | Cytokine |
| IL17RB  | Cytokine |
| IL18    | Cytokine |
| IL19    | Cytokine |
| IL1A    | Cytokine |
| IL1B    | Cytokine |
| IL1R1   | Cytokine |
| IL2     | Cytokine |
| IL20    | Cytokine |
| IL21    | Cytokine |
| IL21R   | Cytokine |
| IL22    | Cytokine |
| IL23    | Cytokine |
| IL23R   | Cytokine |
| IL24    | Cytokine |
| IL25    | Cytokine |
| IL27    | Cytokine |
| IL28RA  | Cytokine |
| IL29    | Cytokine |
| IL2RA   | Cytokine |
| IL3     | Cytokine |
| IL31RA  | Cytokine |
| IL32    | Cytokine |
| IL33    | Cytokine |
| IL36RN  | Cytokine |
| IL4     | Cytokine |
| IL4R    | Cytokine |
| IL5     | Cytokine |
| IL6     | Cytokine |
| IL7     | Cytokine |
| IL8     | Cytokine |
| IL9     | Cytokine |
| PF4     | Cytokine |
| TGFA    | Cytokine |
| TGFB1   | Cytokine |
| TGFB2   | Cytokine |
| TGFB3   | Cytokine |
| TGFBR1  | Cytokine |
| TGFBR2  | Cytokine |
| TGFBR3  | Cytokine |

|           |           |
|-----------|-----------|
| TNF       | Cytokine  |
| TNFRSF10A | Cytokine  |
| TNFRSF10B | Cytokine  |
| TNFRSF10C | Cytokine  |
| TNFRSF10D | Cytokine  |
| TNFRSF11B | Cytokine  |
| TNFRSF12A | Cytokine  |
| TNFRSF13B | Cytokine  |
| TNFRSF19  | Cytokine  |
| TNFRSF1B  | Cytokine  |
| TNFRSF21  | Cytokine  |
| TNFRSF25  | Cytokine  |
| TNFRSF3   | Cytokine  |
| TNFRSF4   | Cytokine  |
| TNFRSF6   | Cytokine  |
| TNFSF10   | Cytokine  |
| TNFSF11   | Cytokine  |
| TNFSF12   | Cytokine  |
| TSLP      | Cytokine  |
| CCL11     | Chemokine |
| CCL15     | Chemokine |
| CCL16     | Chemokine |
| CCL17     | Chemokine |
| CCL18     | Chemokine |
| CCL2      | Chemokine |
| CCL20     | Chemokine |
| CCL22     | Chemokine |
| CCL23     | Chemokine |
| CCL25     | Chemokine |
| CCL27     | Chemokine |
| CCL28     | Chemokine |
| CCL3      | Chemokine |
| CCL4L2    | Chemokine |
| CCL5      | Chemokine |
| CCL7      | Chemokine |
| CCL8      | Chemokine |
| CCR1      | Chemokine |
| CCR10     | Chemokine |
| CCR3      | Chemokine |
| CCR4      | Chemokine |
| CCR6      | Chemokine |
| CCR8      | Chemokine |
| CCR9      | Chemokine |
| CCRL1     | Chemokine |
| CCRL2     | Chemokine |
| CKLF      | Chemokine |
| CX3CL1    | Chemokine |
| CX3CR1    | Chemokine |
| CXCL1     | Chemokine |
| CXCL10    | Chemokine |



|         |           |
|---------|-----------|
| CXCL11  | Chemokine |
| CXCL12  | Chemokine |
| CXCL13  | Chemokine |
| CXCL14  | Chemokine |
| CXCL16  | Chemokine |
| CXCL17  | Chemokine |
| CXCL2   | Chemokine |
| CXCL3   | Chemokine |
| CXCL5   | Chemokine |
| CXCL6   | Chemokine |
| CXCL9   | Chemokine |
| CXCR1   | Chemokine |
| CXCR2   | Chemokine |
| CXCR2P1 | Chemokine |
| CXCR3   | Chemokine |
| CXCR4   | Chemokine |
| CXCR5   | Chemokine |
| CXCR6   | Chemokine |
| CXCR7   | Chemokine |
| DARC    | Chemokine |
| XCL1    | Chemokine |
| XCL2    | Chemokine |
| XCR1    | Chemokine |
| CXCL7   | Chemokine |

---
